1 **Alzheimer's disease-associated *TM2D* genes regulate Notch signaling and neuronal function**  
2 **in *Drosophila***

3 Jose L. Salazar<sup>1,2</sup>, Sheng-An Yang<sup>1,2</sup>, Yong Qi Lin<sup>3</sup>, David Li-Kroeger<sup>2,4</sup>, Paul C. Marcogliese<sup>1,2</sup>, Samantha  
4 L. Deal<sup>2,5</sup>, G. Gregory Neely<sup>3</sup>, Shinya Yamamoto<sup>1,2,5,6,7,#</sup>

5 <sup>1</sup> Department of Molecular and Human Genetics, Baylor College of Medicine (BCM), Houston, TX  
6 77030, USA

7 <sup>2</sup> Jan and Dan Duncan Neurological Research Institute, Texas Children's Hospital, Houston, TX 77030,  
8 USA

9 <sup>3</sup> The Dr. John and Anne Chong Lab for Functional Genomics, Charles Perkins Centre and School of Life  
10 and Environmental Sciences, The University of Sydney, Sydney, NSW 2006, Australia

11 <sup>4</sup> Department of Neurology, BCM, Houston, TX 77030, USA

12 <sup>5</sup> Program in Developmental Biology, BCM, Houston, TX 77030, USA

13 <sup>6</sup> Development, Disease Models & Therapeutics Graduate Program, BCM, Houston, TX 77030, USA

14 <sup>7</sup> Department of Neuroscience, BCM, Houston, TX 77030, USA

15

16 #Corresponding Author: Shinya Yamamoto

17 E-mail: [yamamoto@bcm.edu](mailto:yamamoto@bcm.edu); Phone: 832-824-8119; Fax: N/A

18

19 Keywords: *almondex* (*CG12127*), Alzheimer's disease, *amaretto* (*CG11103*), *biscotti* (*CG10795*),

20 *Drosophila melanogaster*, gamma-secretase complex, neurodegeneration, Notch signaling, *TM2D1*,

21 *TM2D2*, *TM2D3*.

22

23 **Abstract**

24

25 TM2 domain containing (TM2D) proteins are conserved in metazoans and encoded by three separate genes  
26 in each species. Rare variants in *TM2D3* are associated with Alzheimer's disease (AD) and its fly ortholog  
27 *almondex* is required for embryonic Notch signaling. However, the functions of this gene family remain  
28 elusive. We knocked-out all three *TM2D* genes (*almondex*, *CG11103/amaretto*, *CG10795/biscotti*) in  
29 *Drosophila* and found that they share the same maternal-effect neurogenic defect. Triple null animals are  
30 not phenotypically worse than single nulls, suggesting these genes function together. Overexpression of  
31 the most conserved region of the TM2D proteins acts as a potent inhibitor of Notch signaling at the  $\gamma$ -  
32 secretase cleavage step. Lastly, Almondex is detected in the brain and its loss causes shortened lifespan  
33 accompanied by progressive electrophysiological defects. The functional links between all three *TM2D*  
34 genes are likely to be evolutionarily conserved, suggesting that this entire gene family may be involved in  
35 AD.

## 36 Introduction

37 Alzheimer's disease (AD) is the most common neurodegenerative disease affecting the aging  
38 population and accounts for the large majority of age-related cases of dementia (Long and Holtzman, 2019;  
39 Sala Frigerio and De Strooper, 2016). AD is pathologically characterized by histological signs of  
40 neurodegeneration that are accompanied by formation of extracellular plaques and intra-neuronal tangles.  
41 Numerous studies have identified genetic factors that contribute to AD risk and pathogenesis (Bellenguez  
42 et al., 2020). Rare hereditary forms of AD are caused by dominant pathogenic variants in *APP* (*Amyloid*  
43 *Precursor Protein*), *PSEN1* (*Presenilin 1*) or *PSEN2* (*Presenilin 2*). These three genes have been  
44 extensively studied using variety of experimental systems, and the resultant knowledge has led to greater  
45 understanding of how they contribute to the formation of extracellular plaques found in both familial and  
46 sporadic AD brains (Karran et al., 2011). *PSEN1* and *PSEN2* are paralogous genes that encode the catalytic  
47 subunit of the  $\gamma$ -secretase, a membrane-bound intramembrane protease complex (Zhang et al., 2013).  $\gamma$ -  
48 secretase substrates include many type-I transmembrane proteins including APP as well as Notch receptors  
49 that play various roles in development and physiology (Artavanis-Tsakonas et al., 1995; Kopan and Ilagan,  
50 2009). Processing of APP by  $\gamma$ -secretase generates small peptide fragments of varying length, collectively  
51 termed amyloid beta ( $A\beta$ ). The plaques characteristic of AD are largely composed of  $A\beta$  peptides, likely  
52 seeded by the most oligomeric and neurotoxic species of  $A\beta$  that is 42 amino acids long ( $A\beta_{42}$ ). Since  
53 deposition of amyloid plaques can be found in pre-symptomatic stages of the disease (Sperling et al., 2011),  
54 many consider the production of toxic  $A\beta$  peptides to play a critical role during the very early phase of AD  
55 pathogenesis. Interestingly, individuals with one duplicated copy of wild-type APP including Down  
56 syndrome patients (trisomy 21, *APP* is on chromosome 21) have significantly increased risk and earlier  
57 age-of-onset of AD (Lott and Head, 2019), indicating that simply increasing APP and its cleavage products  
58 is sufficient to increase AD risk. Increases in  $A\beta$  production can also trigger the formation of intra-neuronal  
59 tangles composed of hyper-phosphorylated Tau, which can directly impact neuronal function and mediate  
60 degeneration (Ballatore et al., 2007).

61           While studies of genes that cause familial AD have been critical in providing a framework to study  
62 pathogenic mechanisms of AD, pathogenic variants in *APP* and *PSEN1/2* are responsible for only a small  
63 fraction of AD cases (Cacace et al., 2016). Familial AD can be distinguished from more common forms of  
64 AD because most patients with *APP* or *PSEN1/2* variants develop AD before the age of 65 [early-onset AD  
65 (EOAD)]. The majority (>95%) of AD cases are late-onset (LOAD, develops after 65 years of age) and of  
66 sporadic or idiopathic nature (Goldman et al., 2011). In these patients, it is thought that multiple genetic  
67 and environmental factors collaborate to cause damage to the nervous system that converges on a pathway  
68 that is affected by *APP* and *PSEN1/2*. To reveal common genetic factors with relatively small effect sizes,  
69 multiple genome-wide association studies (GWAS) have been performed and have identified over 40 loci  
70 throughout the genome that confer increase risk to developing AD (Bellenguez et al., 2020). The most  
71 notable risk-factors are variant alleles in *APOE* (Strittmatter et al., 1993). Although the precise molecular  
72 mechanism by which different alleles of *APOE* increase or decrease the risk of AD has been extensively  
73 debated, a number of studies have proposed that this gene is involved in the clearance of toxic A $\beta$  peptides  
74 (Serrano-Pozo et al., 2021). A recent meta-analysis has also identified *ADAM10* (encoding a  $\beta$ -secretase  
75 enzyme that cleaves *APP* and Notch) as an AD associated locus (Kunkle et al., 2019), suggesting that genes  
76 involved in familial EOAD and sporadic LOAD may converge on the same molecular pathway. Functional  
77 studies of these and other newly identified risk factors for AD are critical to fully understand the etiology  
78 of this complicated disease that lack effective treatments or preventions.

79           We have previously reported that a rare missense variant (rs139709573, NP\_510883.2:p.P155L) in  
80 *TM2D3* (*TM2 domain containing 3*) is significantly (OR=7.45, p<sub>META</sub> =6.6x10<sup>-9</sup>) associated with  
81 increased risk of developing LOAD through an exome-wide association analysis in collaboration with the  
82 CHARGE (Cohorts for Heart and Aging Research in Genomic Epidemiology) consortium (Jakobsdottir et  
83 al., 2016). This variant was also associated with earlier age-at-onset that corresponds to up to 10 years of  
84 difference with a hazard ratio of 5.3 (95% confidence interval 2.7-10.5) after adjusting for the  $\epsilon 4$  allele of  
85 *APOE*. Although the function of this gene in vertebrates was unknown and this missense variant was not

86 predicted to be pathogenic based on multiple variant pathogenicity prediction algorithms including SIFT  
87 (Sim et al., 2012), PolyPhen (Adzhubei et al., 2010) and CADD (Kircher et al., 2014), we experimentally  
88 demonstrated that p.P155L has deleterious consequences on TM2D3 function based on an assay we  
89 established using *Drosophila* embryos (Jakobsdottir et al., 2016). The *Drosophila* ortholog of *TM2D3*,  
90 *almondex* (*amx*), was initially identified based on an X-linked female sterile mutant allele (*amx<sup>l</sup>*) generated  
91 through random mutagenesis (Shannon, 1972). Although homozygous or hemizygous (over a deficiency)  
92 *amx<sup>l</sup>* mutant females and hemizygous (over Y chromosome) males are viable with no morphological  
93 phenotypes, all embryos laid by *amx<sup>l</sup>* hemi/homozygous mothers exhibit severe developmental  
94 abnormalities including expansion of the nervous system at the expense of the epidermis (Lehmann et al.,  
95 1983; Shannon, 1973). This ‘neurogenic’ phenotype results when Notch signaling mediated lateral  
96 inhibition is disrupted during cell-fate decisions in the developing ectoderm (Lewis, 1996; Salazar and  
97 Yamamoto, 2018). By taking advantage of this scorable phenotype, we showed that the maternal-effect  
98 neurogenic phenotype of *amx<sup>l</sup>* hemizygous females can be significantly suppressed by introducing the  
99 reference human TM2D3 expressed under the regulatory elements of fly *amx*, but TM2D3<sup>p.P155L</sup> expressed  
100 in the same manner fails to do so (Jakobsdottir et al., 2016). This showed that the function of *TM2D3* is  
101 evolutionarily conserved between flies and humans, and the molecular function of *TM2D3* that is relevant  
102 to LOAD may also be related to Notch signaling. More recently, another rare missense variant (p.P69L) in  
103 this gene has been reported in a proband that fit the diagnostic criteria of EOAD or frontotemporal dementia  
104 (Cochran et al., 2019), indicating that other *TM2D3* variants may be involved in dementia beyond LOAD.

105 TM2D3 is one of three highly conserved TM2 domain containing (TM2D) proteins encoded in the  
106 human genome. The two other TM2 domain-containing proteins, TM2D1 and TM2D2 share a similar  
107 protein domain structure with TM2D3, and each protein is encoded by a highly conserved orthologous gene  
108 in *Drosophila* that have not been functionally characterized (*CG10795* and *CG11103*, respectively)  
109 (**Supplemental Figure 1**). All TM2D proteins have a predicted N-terminal signal sequence and two  
110 transmembrane domains that are connected through a short intracellular loop. Within this loop, there is an

111 evolutionarily conserved DRF (aspartate-arginine-phenylalanine) motif, a sequence found in some G-  
112 protein coupled receptors that mediates their conformational change upon ligand binding (Koenen et al.,  
113 2017). The extracellular region between the signal sequence and first transmembrane domain is divergent  
114 in different species as well as among the three TM2D containing proteins. In contrast, the sequences of the  
115 two transmembrane domains as well as the intracellular loop is highly conserved throughout evolution as  
116 well as between the three TM2 domain containing proteins (Kajkowski et al., 2001) (**Supplemental Figure**  
117 **1**). The three proteins also have short C-terminal extracellular tails that are evolutionarily conserved but  
118 vary among the three proteins (e.g. TM2D1 has a slightly longer C'-tail than TM2D2 and TM2D3). The  
119 molecular functions of these conserved and non-conserved domains of TM2D proteins are unknown.

120 In this study, we generated clean null alleles of all three *Drosophila TM2D* genes using  
121 CRISPR/Cas9-mediated homology directed repair (HDR) and assessed their functions *in vivo*. Surprisingly,  
122 we found that *CG10795 (TM2D1)* and *CG11103 (TM2D2)* knockout flies are phenotypically  
123 indistinguishable from *amx (TM2D3)* null animals, displaying severe maternal-effect neurogenic  
124 phenotypes. We also generated double- and triple-knockout animals to determine whether these three genes  
125 have redundant functions in other Notch signaling dependent contexts during development. The triple-  
126 knockout of all *TM2D* genes did not exhibit any obvious morphological phenotypes but shared the same  
127 maternal-effect neurogenic phenotype similar to the single null mutants, suggesting these three genes  
128 function together. We also provide evidence that Amx functions on  $\gamma$ -secretase to modulate Notch signaling  
129 *in vivo*, and further uncover a previously unknown role of this gene in maintenance of neural function in  
130 adults.

131

## 132 **Results**

### 133 **A clean null allele of *amx* fully recapitulates previously reported maternal-effect phenotypes**

134 In a previous study, Michellod et al. reported the generation of a null allele of *amx* (*amx<sup>m</sup>*) by  
135 generating flies that are homozygous for a deletion that removes *amx* and several other genes [*Df(1)FF8*]  
136 and bringing back a genomic rescue construct for *Dsor1*, an essential gene that lies within this locus  
137 (Michellod et al., 2003). The authors reported that zygotic *amx<sup>m</sup>* [actual genotype: *Df(1)FF8; P(Dsor1<sup>+S</sup>)*]  
138 mutant flies have reduced eye size and nicked wing margin as adults, which are phenotypes that had not  
139 been reported in the classic *amx<sup>l</sup>* allele. Because the *amx<sup>l</sup>* allele is caused by a 5bp deletion that may still  
140 produce a product that encodes a portion of the N'-extracellular domain (*amx* is a single exon gene in  
141 *Drosophila*, hence will not be subjected to nonsense mediated decay), the authors concluded that *amx<sup>l</sup>* is a  
142 hypomorphic allele.

143 Since *Df(1)FF8* has not been molecularly characterized and it was uncertain whether all of the  
144 phenotypes attributed to *amx<sup>m</sup>* are due to loss of *amx* alone, we decided to generate a clean null allele of  
145 *amx* (hereafter referred to as *amx<sup>Δ</sup>*) using CRISPR/Cas9 technology (Bier et al., 2018; Knott and Doudna,  
146 2018). We knocked-in a dominant wing color marker (*y<sup>wing2+</sup>*) to replace the coding sequence of *amx* using  
147 HDR (Li-Kroeger et al., 2018) (**Figure 1A**). Insertion of this cassette was screened by the presence of the  
148 visible marker (dark wings) in a *yellow* mutant background and the targeting event was molecularly  
149 confirmed via Sanger sequencing. We also confirmed the loss of *amx* transcript by RT-PCR (**Supplemental**  
150 **Figure 2**). Similar to *amx<sup>l</sup>*, homozygous *amx<sup>Δ</sup>* females exhibit sterility and all embryos produced by these  
151 animals exhibit a neurogenic phenotype (**Figure 1C-E**). Both female fertility and neurogenic phenotypes  
152 of their progeny can be suppressed by introducing a 3.3 kb genomic rescue construct containing the *amx*  
153 locus (**Figure 1A**) (Jakobsdottir et al., 2016). Human TM2D3 expressed using the same regulatory elements  
154 has ~50% activity of fly Amx (**Figure 1C**), consistent with what we previously observed using *amx<sup>l</sup>*  
155 hemizygous females. We did not observe any morphological defects in the eye and wing of homozygous  
156 and hemizygous *amx<sup>Δ</sup>* flies at all temperatures tested (between 18-29°C). We also looked at other tissues  
157 that are often affected when Notch signaling is defective including the notum and legs (Córdoba and Estella,  
158 2020; Schweisguth, 2015) but we did not observe any morphological phenotypes in these tissues either. In

159 summary, *amx*<sup>A</sup> is the first clean loss-of-function (LoF) allele of *amx* generated by CRISPR/Cas9, and  
160 phenotypically resembles the classic *amx*<sup>l</sup> allele rather than the *amx*<sup>m</sup> allele.

161

## 162 Null alleles of other *TM2D* genes exhibit the maternal-effect neurogenic phenotype similar to *amx*

163 Using a similar strategy that we used to generate *amx*<sup>A</sup> (Li-Kroeger et al., 2018), we generated null  
164 alleles for *CG11103* (*TM2D2*, located on the X-chromosome) and *CG10795* (*TM2D1*, located on the 2<sup>nd</sup>  
165 chromosome), two uncharacterized genes without official names (**Figure 2**). This time, we inserted a  
166 dominant body color marker (*y*<sup>body+</sup>) into the endogenous loci of *CG11103* and *CG10795* to knock-out these  
167 genes, and we phenotypically and molecularly characterized these alleles in a similar manner.

168 Both males and females that are hemizygous or homozygous null for *CG11103* are viable and these  
169 animals do not exhibit any morphological defects. Similar to *amx*, *CG11103* mutant females are fully  
170 sterile, and all embryos laid by these mothers exhibit neurogenic phenotypes (**Figure 2C**). Importantly,  
171 these phenotypes are rescued by a 1.5 kb genomic construct containing the *CG11103* locus (**Figure 2B, D,**  
172 **E**). Given the phenotypic and molecular similarities with *amx*, we gave *CG11103* the name *amaretto* (*amrt*),  
173 after the sweet Italian liqueur traditionally flavored with almonds. The knockout allele for this gene is  
174 referred to as *amrt*<sup>A</sup> hereafter.

175 Like *amx* and *amrt*, mutants that are homozygous null for *CG10795* appear morphologically  
176 normal, but all females are sterile and their embryos exhibit a neurogenic phenotype (**Figure 2G**). We were  
177 able to suppress these phenotypes using a ~40kb fosmid transgene in which the *CG10795* protein is C-  
178 terminally tagged with multiple epitopes including GFP (Sarov et al., 2016). Given the phenotypic similarity  
179 to *amx* and *amrt* mutants, we named this gene *biscotti* (*bisc*), after the Italian biscuits traditionally made  
180 with almonds. The knockout allele for this gene is referred to as *bisc*<sup>A</sup> hereafter.

181



## 182 Triple knockout of *TM2D* genes is phenotypically similar to single gene knockouts

183 Embryonic neurogenic defect is a rare phenotype that is almost exclusively associated with genes  
184 that affect the Notch signaling pathway (Lewis, 1996). Given the importance of Notch signaling in most  
185 stages of development preceding adulthood (Artavanis-Tsakonas et al., 1995), it was peculiar that all three  
186 *TM2D* gene mutants do not exhibit any obvious morphological defects related to Notch signaling while all  
187 three alleles exhibit a robust maternal-effect neurogenic phenotype. To test whether this may be due to  
188 redundancy between the three genes, we generated a fly strain that lacks all three *TM2D* genes (**Figure 3**).

189 Because *amx* and *amrt* are both located on the X-chromosome (located in cytological regions 8D2  
190 and 12C4, respectively, which are 19cM away), we recombined the two null alleles by following the  
191 dominant wing color and body color markers knocked into each locus (**Figure 3A**). The *amx*, *amrt* double  
192 null flies (*amx<sup>A</sup> amrt<sup>A</sup>*) in a *yellow* mutant background exhibit wild-type color wings (*y<sup>wing2+</sup>* marker of  
193 *amx<sup>A</sup>*) and bodies (*y<sup>body+</sup>* marker of *amrt<sup>A</sup>*). Absence of both *amx* and *amrt* transcripts in this line was verified  
194 by RT-PCR (**Supplemental Figure 2**). These double null adult flies also appeared morphologically normal  
195 similar to the single null animals (**Figure 3F, I, L**), suggesting that these two genes do not play redundant  
196 roles during the development of imaginal tissues. Consistent with single null animals, the *amx*, *amrt* double  
197 null females were fully sterile, exhibiting a maternal-effect neurogenic phenotype (**Figure 3C**).

198 We next combined the *bisc<sup>A</sup>* allele on the second chromosome with the *amx<sup>A</sup> amrt<sup>A</sup>* mutant X-  
199 chromosome to generate a triple null mutant line (*amx<sup>A</sup> amrt<sup>A</sup>; bisc<sup>A</sup>*) (**Figure 3A**). This genetic  
200 manipulation still did not produce any adult animals with obvious Notch signaling related external  
201 morphological defects (**Figure 3G, J, M**), suggesting that these three genes also do not play redundant roles  
202 in these contexts. Consistent with the single and double null lines, the triple null mutant females are  
203 completely sterile and their progeny show maternal-effect neurogenic defects (**Figure 3D**). We did not  
204 observe any differences in the severity of the neurogenic phenotype in the embryos from the single gene  
205 knockouts and the triple knockout mothers (**Figure 1D, Figure 2C, 2G, Figure 3D**), likely because the

206 neurogenic defect is already strong in single gene knockout animals (**Figures 1, 2**), precluding any additive  
207 or synergistic effects.

208

### 209 **A truncated form of Amx acts as a potent inhibitor of Notch signaling**

210 Knock-out experiments revealed that while each of the three *TM2D* genes are individually  
211 maternally necessary for proper Notch signaling during embryogenesis, they appear to be dispensable for  
212 other developmental contexts that depend on Notch. To further study the function of TM2D proteins *in*  
213 *vivo*, we tested whether overexpression of Amx is sufficient to modulate Notch signaling (**Figure 4**). In  
214 addition to generating a transgene that allows the expression of a full-length Amx protein tagged with an  
215 N'-3xHA tag (placed immediately after the predicted signal sequence, 3xHA::Amx<sup>FL</sup>) (**Figure 4A**) using  
216 the GAL4/UAS binary expression system (Brand and Perrimon, 1993), we generated a version of this  
217 construct that lacks the majority of the non-conserved N'-terminal extracellular domain (3xHA::Amx<sup>ΔECD</sup>)  
218 (**Figure 4D**) to specifically test the function of the highly conserved TM2 domain.

219 When we expressed these two transgenes in the developing dorsal thorax using *pannier-GAL4* (*pnr-*  
220 *GAL4*), we observed that Amx<sup>FL</sup> did not cause any defects whereas Amx<sup>ΔECD</sup> caused an increase in the  
221 number of mechanosensory bristles (**Figure 4B, E**), suggesting an effect on Notch mediated lateral  
222 inhibition. We then expressed the two proteins in the developing posterior compartment within wing  
223 imaginal discs using *engrailed-GAL4* (*en-GAL4*). We observed notching of the posterior wing margin when  
224 Amx<sup>ΔECD</sup> was expressed (**Figure 4F**), while no such defect was seen upon expression of Amx<sup>FL</sup> (**Figure**  
225 **4C**). To determine whether the wing notching caused by Amx<sup>ΔECD</sup> overexpression was indeed due to loss  
226 of Notch signaling, we visualized Notch activation using NRE-GFP (Notch Responsive Element-Green  
227 Fluorescent Protein), a synthetic *in vivo* Notch signaling reporter (Housden et al., 2012), as well as  
228 immunostaining of Cut, encoded by an endogenous downstream target gene of Notch activation in this  
229 context (Micchelli et al., 1997). While overexpression of Amx<sup>FL</sup> did not affect NRE-GFP and Cut

230 expression (**Figure 4G**), expression of Amx<sup>ΔECD</sup> caused a reduction in both NRE-GFP and Cut expression  
231 within the *en-GAL4* expression domain (**Figure 4H**). In summary, overexpression of full-length Amx did  
232 not affect developmental events related to Notch signaling in the thorax and wing, while overexpression of  
233 a truncated form that only carries the conserved TM2 domain and its short C'-tail inhibited Notch signaling  
234 in several developmental contexts.

235

### 236 **Truncated Amx inhibits Notch signaling at the $\gamma$ -secretase mediated receptor cleavage step**

237 Amx has been proposed to function at the  $\gamma$ -secretase cleavage step of Notch activation based on a  
238 genetic epistasis experiment (Michellod and Randsholt, 2008). Notch signaling activation is initiated by the  
239 binding of the Notch receptor to its ligands (Delta or Serrate in *Drosophila*) (Hori et al., 2013). This induces  
240 a conformational change of Notch to reveal a cleavage site that is recognized by ADAM10 (encoded by  
241 *kuzbanian* in *Drosophila*) (Duoja and Rubin, 1997). Notch receptor that has undergone ADAM10 cleavage  
242 (S2 cleavage) is referred to as N<sup>EXT</sup> (Notch extracellular truncation) and becomes a substrate for  $\gamma$ -secretase  
243 (Mumm et al., 2000). N<sup>EXT</sup> that is cleaved by  $\gamma$ -secretase (S3 cleavage) releases its intracellular domain  
244 (N<sup>ICD</sup>), which then translocates to the nucleus and regulates transcription of downstream target genes (De  
245 Strooper et al., 1999). To determine how *amx* regulates Notch signaling, Michellod and Randsholt  
246 attempted to suppress the embryonic neurogenic phenotype of embryos produced from *amx<sup>l</sup>* mutant  
247 mothers by zygotically overexpressing different forms of Notch using a heat-shock promoter (Michellod  
248 and Randsholt, 2008). While N<sup>ICD</sup> was able to weakly suppress the neurogenic defect, N<sup>EXT</sup> was not able to  
249 do so, suggesting that Amx somehow modulates the function of the  $\gamma$ -secretase complex. However, because  
250 the phenotypic suppression observed by N<sup>ICD</sup> in this study was very mild and since the authors used Notch  
251 transgenes that were inserted into different regions of the genome (thus N<sup>ICD</sup> and N<sup>EXT</sup> may be expressed at  
252 different levels and cannot be directly compared), additional data is required to fully support this  
253 conclusion.

254 To determine how  $\text{Amx}^{\Delta\text{ECD}}$  inhibits Notch signaling when ectopically overexpressed, we  
255 performed similar epistasis experiments but with improved genetic tools (**Figure 5**). First, we generated  
256 several UAS constructs expressing different forms of Notch and inserted them into the identical genomic  
257 location on the 2<sup>nd</sup> chromosome using site specific  $\phi\text{C31}$ -mediated transgenesis to avoid positional effects  
258 (Bischof et al., 2012; Venken et al., 2006) (**Figure 5A**). In addition to transgenes that allow expression of  
259  $\text{N}^{\text{ICD}}$ ,  $\text{N}^{\text{EXT}}$  and full-length Notch ( $\text{N}^{\text{FL}}$ ), we also generated a ligand-independent form of *UAS-Notch* that  
260 still depends on ADAM10 and  $\gamma$ -secretase by deleting several epidermal growth factor-like repeats (EGF)  
261 of the extracellular domain that contains the ligand binding domain and Lin-12/Notch Repeats (LNR)  
262 within the negative regulatory region ( $\text{N}^{\Delta\text{EGF1-18.LNR}}$ ) (Lieber et al., 2002). When we overexpressed  $\text{N}^{\text{ICD}}$ ,  
263  $\text{N}^{\text{EXT}}$  or  $\text{N}^{\Delta\text{EGF1-18.LNR}}$  in the developing wing pouch using *nubbin-GAL4* (*nub-GAL4*), we observed increased  
264 Cut expression throughout the wing pouch, indicating ectopic Notch activation (**Figure 5B-D**). Over-  
265 expression of  $\text{N}^{\text{FL}}$  only showed a mild increase in Cut expression in limited regions of the wing pouch  
266 (**Supplemental Figure 3B**), likely due to its ligand-dependence. These observations are consistent with  
267 previous reports using UAS-Notch transgenic lines generated using random (P-element mediated)  
268 transgenesis technology (Doherty et al., 1996).

269 Next, we recombined *nub-GAL4* and *UAS-3xHA::amx<sup>ΔECD</sup>* onto the same chromosome. The  
270 resultant genetic recombinants constitutively overexpresses  $\text{Amx}^{\Delta\text{ECD}}$  in the wing pouch, with heterozygous  
271 adults exhibiting wing notching and homozygous animals completely lacking wings in adulthood  
272 (**Supplemental Figure 4A-B**). We then crossed these *nub-GAL4*, *UAS-3xHA::amx<sup>ΔECD</sup>* flies to different  
273 *UAS-Notch* lines to determine if  $\text{Amx}^{\Delta\text{ECD}}$  can modulate the ectopic Cut expression phenotype caused by  
274 Notch overexpression. We found that co-overexpression of  $\text{Amx}^{\Delta\text{ECD}}$  significantly suppresses the induction  
275 in Cut expression caused by  $\text{N}^{\Delta\text{EGF1-18.LNR}}$  or  $\text{N}^{\text{EXT}}$  (**Figure 5E-F**), but had no effect on the same phenotype  
276 caused by  $\text{N}^{\text{ICD}}$  (**Figure 5G**). This indicates that *amx<sup>ΔECD</sup>* genetically acts at the  $\gamma$ -secretase-mediated  
277 cleavage step of Notch activation, consistent with previous epistasis experiments using *amx<sup>l</sup>* (Michellod  
278 and Randsholt, 2008).

279 To further understand how Amx<sup>ΔECD</sup> inhibits Notch signaling upon overexpression, we assessed  
280 the distribution of the Notch receptor through immunostaining using a monoclonal antibody that  
281 recognizes both cleaved and uncleaved forms of Notch (Fehon et al., 1990). Upon overexpression with  
282 *decapentaplegic-GAL4* (*dpp-GAL4*), which is expressed in a limited domain within the wing pouch, we  
283 observed that Amx<sup>ΔECD</sup> causes wing notching (**Supplemental Figure 4D**) that is accompanied by a  
284 dramatic upregulation of Notch receptor (**Figure 5J-K**). To test whether a similar phenotype is seen upon  
285 loss of  $\gamma$ -secretase function, we knocked-down *Psn* (*Presenilin*, which is orthologous to human *PSENI*  
286 and *PSEN2*) in the wing disc and assessed its effect on Notch protein levels. When we performed RNAi  
287 against *Psn* using a *UAS-RNAi* line that had been validated in a previous study (Kang et al., 2017) with  
288 *dpp-GAL4*, we found that knock-down of *Psn* shows an accumulation of Notch similar to Amx<sup>ΔECD</sup> over-  
289 expression but to a lesser extent (**Figure 5L**). To also test whether this Notch accumulation phenotype  
290 occurs when Notch cleavage is altered by another mechanism, we tested whether loss of ADAM10 also  
291 causes this defect. When we generated mutant clones of a null allele of *kuz* (*kuz<sup>e29-4</sup>*) (Rooke et al., 1996)  
292 using the MARCM (Mosaic analysis with a repressible cell marker) system (Lee and Luo, 1999), we did  
293 not observe any alterations in Notch expression (**Supplemental Figure 5**), indicating that the increase in  
294 Notch levels seen upon over-expression of Amx<sup>ΔECD</sup> and *Psn* knockdown is rather specific.

295 In summary, while over-expression of the full-length Amx protein did not cause any obvious  
296 defects, we serendipitously found that a truncated form of this protein that only contains the region that is  
297 highly conserved among all TM2D proteins can act as a potent inhibitor of Notch signaling when  
298 overexpressed. Epistasis experiments show that Amx<sup>ΔECD</sup> acts at the S3 cleavage step of Notch activation,  
299 suggesting that it likely regulates  $\gamma$ -secretase. This is further supported by our findings that overexpression  
300 of Amx<sup>ΔECD</sup> and knock-down of *Psn*, but not loss of *kuz*, both lead to accumulation of Notch.

301

302 ***amx* null mutants have shortened lifespan**

303 AD is an adult-onset age-dependent disease that worsens over time. While *TM2D3<sup>p.P155L</sup>* has been  
304 associated with LOAD (Jakobsdottir et al., 2016) and *TM2D3<sup>p.P69L</sup>* has been recently reported in a proband  
305 with EOAD or frontotemporal dementia (Cochran et al., 2019), there is no functional data that directly links  
306 this gene to an age-dependent neurological phenotype in any species. To determine if loss of *TM2D3* causes  
307 an age-dependent phenotype, we first assessed the lifespan of *amx<sup>A</sup>* mutant animals. We compared the  
308 longevity of *amx<sup>A</sup>* hemizygous male flies with flies that also carry a genomic rescue construct (*amx<sup>A</sup> + amx*)  
309 to minimize the effect of genetic background (Jakobsdottir et al., 2016). We selected males for our analysis  
310 because *amx* loss does not affect male fertility, allowing us to ignore any changes in lifespan that may be  
311 caused by alterations in fecundity (Flatt, 2011). In contrast to the rescued control animals that exhibit a  
312 median lifespan of 51 days, the median lifespan of *amx* null flies is significantly shorter at 27 days (**Figure**  
313 **6A**,  $p=1.0 \times 10^{-11}$ ). We next tested whether human *TM2D3* can substitute for the loss of *amx* in this context  
314 by introducing the humanized genomic rescue construct (Jakobsdottir et al., 2016) into the *amx* null mutant  
315 background (*amx<sup>A</sup> + hTM2D3*). These humanized *TM2D3* animals had a median lifespan of 33 days  
316 (**Figure 6A**). These data indicate that loss of *amx* causes reduction in lifespan, and human *TM2D3* can  
317 weakly but significantly ( $p=9.5 \times 10^{-10}$ ) suppress this phenotype.

318

### 319 **Amx is expressed in the adult brain**

320 Shortened lifespan seen in *amx<sup>A</sup>* animals could be due to a number of reasons including defects in  
321 the nervous system or other organs functionally affected by the loss of *amx*. Based on publicly available  
322 microarray (Chintapalli et al., 2007), RNA sequencing (RNA-seq) (Brown et al., 2014) and single cell  
323 RNA-sequencing (scRNA-seq) (Davie et al., 2018) datasets, *amx* mRNA has been detected in the adult  
324 nervous system at low levels in a subset of neurons and glia cells, though it's expression level in the nervous  
325 system is higher than most other tissues examined. (**Supplemental Figure 6**). To determine whether Amx  
326 protein can be detected in the adult nervous system, we generated an N<sup>2</sup>-tagged *amx* genomic rescue

327 construct in which a 3xHA epitope is inserted immediately after the signal sequence of the Amx protein  
328 (**Figure 1A-B**) similar to the *UAS-3xHA::amx* transgene (**Figure 4A**). This tagged genomic rescue  
329 construct is able to rescue the female fertility and the maternal-effect neurogenic phenotype of *amx<sup>d</sup>* (**Figure**  
330 **1C, 1F**), indicating the epitope tag does not have a major effect on Amx function. Next, we verified  
331 expression of 3xHA::Amx in the female ovary through immunofluorescent staining and western blot  
332 (**Supplemental Figure 7**). Based on immunostaining, we detected 3xHA::Amx in nurse cells of the ovary  
333 and observed that it localizes to the cell membrane as well as in intracellular puncta (**Supplemental Figure**  
334 **7A-B**). Based on western blot, we identified 3xHA::Amx at the predicted molecular weight [34.82 kDa  
335 (31.35 kDa for Amx, 3.47 kDa for the 3xHA tag)] (**Supplemental Figure 7C**). Finally, we assessed the  
336 expression of 3xHA::Amx in the adult brain via immunostaining and western blot. While we did not observe  
337 a strong signal beyond background fluorescence based on immunofluorescence staining using an anti-HA  
338 antibody (not shown), we detected 3xHA::Amx via western blot using brain extracts at the expected  
339 molecular weight as we observed in the ovary extracts (**Figure 6C**). In conclusion, Amx is expressed in the  
340 adult nervous system at relatively low levels.

341

#### 342 ***amx* null mutants show progressive electrophysiological defects**

343 Finally, to directly assess whether *amx* is required for maintenance of neural function, we  
344 performed electrophysiology on *amx<sup>d</sup>* animals and controls. The giant fiber system is a neuronal circuitry  
345 that is required for rapid escape responses in insects and has been used as a model circuitry to assess  
346 neuronal function in a quantitative manner in adult flies (Allen and Godenschwege, 2010). This pathway  
347 can be activated through direct stimulation of the brain and the outputs of the circuit can monitored by  
348 recording the responses from the tergotrochanteral (TTM) and dorsal longitudinal (DLM) muscles (**Figure**  
349 **6C**). For a given time point, we applied multiple stimulations at different frequencies (20, 50, and 100 Hz;  
350 **Figure 6D-G, Supplemental Figures 8-10**), and measured how well these muscles respond to each  
351 stimulation. Healthy neurons can follow the stimulations showing a ‘probability of response’ that is close



352 to 1.0, but neurons that are unhealthy show decreased ‘probability of response’, which indicates failure of  
353 the signal to travel from the brain to the muscles (Martinez et al., 2007; Oyston et al., 2018).

354 At 5 days post-eclosion, *amx*<sup>Δ</sup> flies have a minor but significant failure rate at later stimulations at  
355 100 Hz in the DLM muscle compared to control animals (rescued with a wild-type *amx* [*amx*<sup>Δ</sup> + *amx*] or  
356 N<sup>+</sup>-3xHA tagged *amx* [*amx*<sup>Δ</sup> + 3xHA::*amx*]; **Figure 6E**). Additionally, *amx*<sup>Δ</sup> animals show only slight,  
357 early stimulation failure rates in the TTM at 50 and 100 Hz at 5 days (**Figure 6D, Supplemental Figure**  
358 **8D**). At 15 days post-eclosion, *amx*<sup>Δ</sup> animals still only show slight failure rate in the TTM at 100 Hz  
359 (**Supplemental Figure 9E**) but begin to show a significant increase in failure rate compared to control  
360 animal recordings from the DLM at 50 and 100 Hz (**Supplemental Figure 9D, F**). At 25 days post-eclosion,  
361 the defects in the DLM increase in severity for 50 and 100 Hz compared to rescued controls (**Figure 6G,**  
362 **Supplemental Figure 10D**). At this time point, the TTM also begins to show a significant failure rate in  
363 *amx*<sup>Δ</sup> animals compared to rescued animals (**Figure 6F**). Interestingly, unlike in the lifespan assay in which  
364 the human TM2D3 did not dramatically suppress the *amx*<sup>Δ</sup> mutant phenotype and in the  
365 fertility/neurogenesis assay in which the human TM2D3 showed ~50% activity of the fly Amx protein, we  
366 found that human TM2D3 is able to significantly suppress the electrophysiological defects close to the level  
367 of fly Amx (**Figure 6F-G**). In summary, loss of *amx* causes an age-dependent decline in neuronal function,  
368 and this defect can be fully rescued by both fly and human *TM2D3*, indicating an evolutionarily conserved  
369 role of this gene in healthy aging.

370

## 371 Discussion

372 In this study, we functionally characterized *TM2D* genes through gene knockout and over-  
373 expression strategies in *Drosophila melanogaster* to gain biological knowledge on this understudied but  
374 evolutionarily conserved gene family that has been implicated in AD. We first showed that the knockout  
375 allele of *amx* (*Drosophila* homolog of *TM2D3*) generated by CRISPR is phenotypically indistinguishable



376 from the classic *amx*<sup>l</sup> allele and displays female sterility and a maternal-effect neurogenic defect. Recently,  
377 we reported that this allele also shows a maternal-effect inductive signaling defect to specify the  
378 mesoectoderm during embryogenesis, which is another Notch-dependent event (Das et al., 2020),  
379 demonstrating that *amx* is maternally required for multiple Notch signaling dependent processes during  
380 embryogenesis. In addition, we generated the first knockout alleles of *amrt* (*Drosophila* ortholog of  
381 *TM2D2*) and *bisc* (*Drosophila* ortholog of *TM2D1*) and documented that each null allele phenotypically  
382 mimics the loss of *amx*. Furthermore, we revealed that the triple knockout of all three *TM2D* genes in  
383 *Drosophila* show identical maternal-effect neurogenic phenotypes without exhibiting other obvious Notch  
384 signaling-related developmental defects. Moreover, although the over-expression of the full-length Amx  
385 did not cause any scorable defects, we serendipitously found that expression of a truncated form of Amx  
386 that lacks the majority of the extracellular domain (Amx<sup>ΔECD</sup>) can strongly inhibit Notch signaling in the  
387 developing wing imaginal disc. Through genetic epistatic experiments using newly generated *UAS-Notch*  
388 transgenic lines, we mapped this inhibitory effect to the  $\gamma$ -secretase cleavage step of Notch activation.  
389 Subsequently, we showed that Amx is expressed in the adult nervous system and that *amx* null animals  
390 have a shortened lifespan. Finally, through electrophysiological recordings of the giant fiber system, we  
391 showed that *amx* null flies show age-dependent decline in neuronal function. In summary, we demonstrate  
392 that all three *TM2D* genes play critical roles in embryonic Notch signaling to inhibit the epithelial-to-neuron  
393 cell fate transformation as maternal-effect genes, and that *amx* is required for neuronal maintenance in the  
394 adult nervous system, a function that may be related to the role of human *TM2D3* in AD.

395 *TM2D* genes are found in multicellular animals but are absent in yeasts (e.g. *Saccharomyces*  
396 *cerevisiae*, *Schizosaccharomyces pombe*) and plants (e.g. *Arabidopsis thaliana*), suggesting that this family  
397 of genes arose early in the metazoan lineage. In humans and flies, there are three *TM2 domain-containing*  
398 genes (*TM2D1*, *TM2D2*, *TM2D3* in *Homo sapiens*; *bisc*, *amrt*, *amx* in *Drosophila melanogaster*,  
399 respectively), each corresponding to a single gene in the other species. Interestingly, this 1:1 ortholog  
400 relationship is also seen in mouse (*Tm2d1*, *Tm2d2*, *Tm2d3*), frog (*Xenopus tropicalis*: *tm2d1*, *tmd2d*, *tm2d3*)

401 zebrafish (*Danio rerio*: *tm2d1*, *tm2d2*, *tm2d3*) and worm (*Caenorhabditis elegans*: *Y66D12A.21*, *C02F5.13*,  
402 *C41D11.9*) (**Supplemental Figure 1**). In general, most genes have more paralogous genes in humans  
403 compared to flies (for example, one *Drosophila Notch* gene corresponding to four *NOTCH* genes in human)  
404 as vertebrates underwent two rounds of whole-genome duplication (WGD) events during evolution  
405 (Kasahara, 2007). Furthermore, teleosts including zebrafish underwent an extra round of WGD (Glasauer  
406 and Neuhauss, 2014), leading to formation of extra duplicates in 25% of all genes (e.g. one *NOTCH1* gene  
407 in human corresponds to *notch1a* and *notch1b* in zebrafish). Hence it is interesting that each of the three  
408 *TM2D* genes remained as single copy genes in various species despite whole genome level evolutionary  
409 changes, suggesting that there may have been some selective pressure to keep the dosage of these genes  
410 consistent and balanced during evolution.

411         Although the *in vivo* functions of *TM2D1* and *TM2D2* have not been studied in any organism,  
412 several lines of studies performed in cultured cells suggest that these genes may also play a role in AD  
413 pathogenesis. Through a yeast-two hybrid screen to identify proteins that bind to A $\beta$ 42, Kajkowski et al.  
414 identified TM2D1 and referred to this protein as BBP (beta-amyloid binding protein) in their study  
415 (Kajkowski et al., 2001). They further showed that TM2D1 can also interact with A $\beta$ 40, a non-  
416 amyloidogenic form of A $\beta$ , and mentioned that they have preliminary data that it also binds to APP  
417 (published and unpublished data in Kajkowski et al., 2001). The interaction between A $\beta$  peptides and  
418 TM2D1 was shown to require the extracellular domain as well as a portion of the first transmembrane  
419 domain of TM2D1. Because overexpression of TM2D1 in a human neuroblastoma cell line (SH-SY5Y)  
420 increased the sensitivity of these cells to cell death caused by incubation with aggregated A $\beta$  and since the  
421 DRF motif was found to be required for this activity, the authors of this original study proposed that TM2D1  
422 may function as a transmembrane receptor that mediates A $\beta$ -toxicity (Kajkowski et al., 2001). However, a  
423 follow-up study from another group refuted this hypothesis by providing data that TM2D1 is not coupled  
424 to G proteins using a heterologous expression system in *Xenopus* oocytes (Lee et al., 2003).

425 To our surprise, loss of *bisc/TM2D1* and *amrt/TM2D2* were phenotypically indistinguishable from  
426 the loss of *amx/TM2D3*. The zygotic loss of each gene did not exhibit any strong developmental defects  
427 into adulthood, despite their relatively ubiquitous expression pattern according to large transcriptome  
428 datasets (Brown et al., 2014; Chintapalli et al., 2007). Similarly, the triple null mutants did not exhibit any  
429 morphological defect, suggesting that these genes are not required zygotically during development. In  
430 contrast, maternal loss of any single *TM2D* gene causes a strong neurogenic defect, which is also seen in  
431 embryos laid by triple knockout animals. The neurogenic defect is a classical phenotype in *Drosophila* that  
432 was originally reported in the mid-1930s (Artavanis-Tsakonas and Muskavitch, 2010; Yamamoto et al.,  
433 2014), and the study of mutants that show this phenotype led to the establishment of the core Notch  
434 signaling pathway in the late 1980's and early 1990's (Artavanis-Tsakonas et al., 1995; Lehmann et al.,  
435 1981). Although the study of neurogenic phenotypes and genes has a long history, this phenotype is a very  
436 rare defect that has so far been associated with only 18 genes according to FlyBase (Larkin et al., 2021),  
437 prior to this work. Seven genes show this defect as zygotic mutants [*aqz*, *bib*, *Dl*, *E(spl)m8-HLH*, *mam*, *N*  
438 and *neur*], seven genes are zygotically-required essential genes with large maternal contributions (hence  
439 the need to generate maternal-zygotic mutants by generating germline clones to reveal the embryonic  
440 neurogenic defect) [*Gmd*, *Gmer*, *gro*, *Nct*, *O-fut1*, *Psn* and *Su(H)*], one gene has only been investigated by  
441 RNAi (*Par-1*) and four genes including *amx* are non-essential genes and show maternal-effect neurogenic  
442 defects (*amx*, *brn*, *egh*, *pcx*). Hence, our study has revealed two new genes that are evolutionarily closely  
443 linked to *amx* in this Notch signaling related process.

444 The similarity of the phenotypes and sequences of *amx*, *amrt* and *bisc* suggests that these proteins  
445 may function together in the context of embryonic neurogenesis. Interestingly, high-throughput proteomics  
446 data based on co-immunoprecipitation mass spectrometry (co-IP/MS) from human cells has detected  
447 physical interactions between TM2D1-TM2D3 (Oughtred et al., 2021) and TM2D2-TM2D3 (Huttlin et al.,  
448 2017), suggesting these proteins may form a protein complex. Further biochemical studies will be required  
449 to clarify the functional relationship between the three TM2D proteins. Two additional mammalian datasets

450 further support our hypothesis that these three proteins functions together. First, all three *TM2D* genes were  
451 identified through a large scale cell-based CRISPR-based screen to identify novel regulators of  
452 phagocytosis (Haney et al., 2018). Singular knock-out of *TM2D* genes in a myeloid cell line was sufficient  
453 to cause a similar phagocytic defect among the mutant cell lines based on the parameters the authors  
454 screened for (e.g. substrate size, materials to be engulfed). Although the authors of this study did not  
455 generate double or triple knockout cell lines to determine whether there were additive or synergistic effects  
456 when multiple *TM2D* genes were knocked out, this suggests that the three genes may function together in  
457 phagocytosis. The authors further note these genes are broadly expressed in diverse cell types beyond  
458 phagocytic cells in the nervous system and thus may play other roles in disease progression (Zhang et al.,  
459 2014). Second, preliminary phenotypic data from the International Mouse Phenotyping Consortium  
460 (Dickinson et al., 2016) indicates that single knockout of mice of *Tm2d1*  
461 (<https://www.mousephenotype.org/data/genes/MGI:2137022>), *Tm2d2*  
462 (<https://www.mousephenotype.org/data/genes/MGI:1916992>) and *Tm2d3*  
463 (<https://www.mousephenotype.org/data/genes/MGI:1915884>) are all recessive embryonic lethal prior to  
464 E18.5. Although detailed characterization of these mice will be required and further generation of a triple  
465 knockout line is desired, the shared embryonic lethality may indicate that these three genes potentially  
466 function together in an essential developmental paradigm during embryogenesis in mice.

467 Our attempts to unravel the function of Amx through overexpression of the full-length protein was  
468 uninformative since this manipulation did not cause any scorable phenotype. However, we found that  
469 expression of the most conserved region of Amx that lacks the majority of the N'-extracellular domain  
470 strongly inhibited Notch signaling during wing and notum development. These results were surprising  
471 because we did not see any wing or bristle defects in the triple *TM2D* gene family knockout flies. This  
472 could be due to one of the two following possibilities: First, *TM2D* genes do indeed play regulatory roles  
473 during wing and bristle development but zygotic mutants do not show any phenotypes because there is  
474 sufficient maternal contribution (the zygotic triple knockout *amx<sup>A</sup> amrt<sup>A</sup>; bisc<sup>A</sup>* flies are derived from *amx<sup>A</sup>*

475 *amrt*<sup>A/+</sup> +; *bisc*<sup>A/+</sup> females who have one copy of each *TM2D* gene still intact). This hypothesis is  
476 supported by high-throughput transcriptomics (microarray and RNA-seq) data that *TM2D* genes are  
477 expressed in the ovary at a higher level compared to most other tissues (Brown et al., 2014; Chintapalli et  
478 al., 2007). In this case, Amx<sup>ΔECD</sup> may be acting as a dominant-negative protein, sequestering the endogenous  
479 substrates of Amx (and potentially of Amrt and Bisc as well) because it likely only carries one of the critical  
480 functional domains of this protein (TM2 domain). The second possibility is that Amx<sup>ΔECD</sup> acts as a  
481 neomorphic allele, inhibiting a protein that is involved in Notch signaling in which the conserved portion  
482 of Amx has the capacity of binding to. In either scenario, by performing epistasis analysis using different  
483 forms of Notch, we determined that the factor that Amx<sup>ΔECD</sup> acts on is likely to be the  $\gamma$ -secretase complex.  
484 This data is consistent with earlier epistasis experiments performed on *amx*<sup>l</sup> in the context of embryonic  
485 neurogenesis (Michellod and Randsholt, 2008), further supporting the idea that *amx* has the capacity to  
486 regulate  $\gamma$ -secretase *in vivo*. We further determined that over-expression of Amx<sup>ΔECD</sup> in the wing imaginal  
487 disc causes an accumulation of Notch protein, similar to what is seen upon knockdown of *Psn* (fly ortholog  
488 of human *PSEN1* and *PSEN2*), consistent with earlier findings showing Notch accumulation at the cell  
489 membrane in the neuroblasts of *Psn* mutants (Guo et al., 1999). In summary, we showed that ectopic over-  
490 expression of a portion of Amx that is conserved among TM2D proteins causes a strong Notch signaling  
491 defect due to a defect in  $\gamma$ -secretase function, suggesting that endogenous function of this protein is likely  
492 related to  $\gamma$ -secretase, providing a potential molecular link to AD pathogenesis in humans.

493 By aging the *amx* null male flies that are visibly indistinguishable from the control flies (*amx* null  
494 flies with genomic rescue constructs), we found that loss of *amx* causes a significant decrease in lifespan.  
495 By generating a functional genomic rescue transgene in which Amx is tagged with an epitope tag, we found  
496 that this protein is expressed in the adult brain. By further performing electrophysiological recordings of  
497 the giant fiber system, which is a model circuit that is frequently used in neurological and neurodegenerative  
498 research in *Drosophila* (Allen and Godenschwege, 2010; Luan et al., 2014; Watson et al., 2008; Zhao et  
499 al., 2010), we found that there is an age-dependent decline in the integrity of this circuit. We observed that

500 the DLM branch of the giant fiber system begins to show failures earlier than the TTM branch. The DLM  
501 is activated by giant fiber neurons that chemically synapse onto PSI (peripherally synapsing interneuron)  
502 neurons through cholinergic synapses, which in turn chemically synapse onto motor neurons (DLMn which  
503 are glutamatergic) through cholinergic connections. The TTM, in contrast, is activated by GF neurons that  
504 electrically synapse onto motor neurons (TTMn which are glutamatergic) through gap junctions, causing a  
505 more rapid response. Considering the difference in the sensitivity of the two branches, cholinergic  
506 neurons/synapses may be more sensitive to the loss of *amx*, a neuronal/synaptic subtype that is severely  
507 affected in Alzheimer's disease in an age-dependent manner (Hampel et al., 2018).

508         How does *amx* maintain neuronal function in aged animals and is this molecular function related  
509 to AD? One potential molecular mechanism is through the regulation of  $\gamma$ -secretase in the adult brain. By  
510 knocking down subunits of the  $\gamma$ -secretase complex, *Psn* and *Nct* (*Nicastrin*), specifically in adult neurons,  
511 Kang et al. showed that reduction of  $\gamma$ -secretase function decreases lifespan, which was associated with  
512 histological signs of neurodegeneration (Kang et al., 2017). The requirement of  $\gamma$ -secretase components in  
513 neuronal integrity has also been reported in mice (Feng et al., 2004; Saura et al., 2004; Tabuchi et al., 2009;  
514 Watanabe et al., 2014; Wines-Samuelson et al., 2010), suggesting this is an evolutionarily conserved  
515 phenomenon. Interestingly, the role of the  $\gamma$ -secretase complex in neuronal maintenance is unlikely to be  
516 due to defects in Notch signaling because neurodegeneration has not been observed upon conditional  
517 removal of Notch activity in post-developmental brains in flies and in mice (Salazar et al., 2020). While the  
518 precise function of  $\gamma$ -secretase in neuronal maintenance is still unknown, several possibilities including its  
519 role in regulating mitochondrial morphology (Wines-Samuelson et al., 2010) and calcium homeostasis (Wu  
520 et al., 2013; Zhang et al., 2009) based on studies in *C. elegans* and mice. Investigating whether *Amx* does  
521 indeed regulate  $\gamma$ -secretase in adult neurons and whether it impacts the aforementioned processes will likely  
522 facilitate our understanding on how this gene regulates neuronal health. Furthermore, considering that  
523 *TM2D3* and other *TM2D* genes have been proposed to function in phagocytic cells, and because  
524 phagocytosis process plays many roles beyond engulfment of toxic A $\beta$  molecules in the nervous system

525 (Fu et al., 2014), Amx may also be playing a role in engulfing unwanted materials that are harmful for the  
526 adult brain. For example, loss of the phagocytic receptor Draper in glia cells causes age-dependent  
527 neurodegeneration that is accompanied by accumulation of non-engulfed apoptotic neurons throughout the  
528 fly brain (Etchegaray et al., 2016). Interestingly, a recent study has shown that over-expression of  
529 phagocytic receptors can also promote neurodegeneration (Hakim-Mishnaevski et al., 2019), indicating the  
530 level of phagocytic activity needs to be tightly controlled *in vivo*. Further studies of *amx*<sup>Δ</sup> mutants (as well  
531 as *amx*<sup>Δ</sup> *amrt*<sup>Δ</sup>; *bisc*<sup>Δ</sup> triple mutants) in the context of phagocytosis will likely reveal the precise molecular  
532 function of Amx and other TM2D proteins in this process.

533 Finally, could there be any molecular link between the role of *TM2D* genes in Notch signaling  
534 (proposed based on experiments in *Drosophila*) and phagocytosis (revealed based on mammalian cell  
535 culture based studies), or are they two independent molecular functions of the same proteins? All TM2D  
536 proteins have two transmembrane domains connected by a short intracellular loop, making them an integral  
537 membrane protein. By tagging the *amx* genomic rescue construct with a 3xHA tag that does not influence  
538 the function of Amx, we observed that 3xHA::Amx is localized to the plasma membrane as well as  
539 intracellular puncta, which likely reflects intracellular vesicles. Interestingly in embryos laid by *amx*<sup>Δ</sup>  
540 mutant females, we observed a mild and transient but significant alteration in Notch distribution during  
541 early embryogenesis (Das et al., 2020). Moreover, we observed a strong accumulation of Notch when we  
542 overexpressed Amx<sup>ΔECD</sup> in the developing wing primordium. These data indicate that *amx* may affect  
543 protein trafficking, which in turn may impact the processing of Notch by the  $\gamma$ -secretase complex. Indeed,  
544 Notch signaling is highly regulated by vesicle trafficking and alterations in exocytosis, endocytosis,  
545 recycling and degradation all impact the signaling outcome (Schnute et al., 2018; Yamamoto et al., 2010).  
546 In fact, multiple studies have proposed that  $\gamma$ -secretase cleavage occurs most effectively in acidified  
547 endocytic vesicles (Baron, 2012; Fortini and Bilder, 2009). Hence, while *amx* may be specifically required  
548 for the proper assembly or function of the  $\gamma$ -secretase complex, it may alternatively be necessary to bring  
549 Notch and other substrates to the proper subcellular location for proteolytic cleavages to occur efficiently.



550 This latter model indicates that the primary function of Amx is to regulate intracellular trafficking, which  
551 may also explain how this protein may be involved in phagocytosis. Similar to Notch signaling,  
552 phagocytosis requires coordination of many cellular trafficking events to expand the plasma membrane to  
553 form a phagophore, internalize the particle of interest to generate a phagosome, and fuse the phagosome to  
554 lysosomes to degrade its content (Melcarne et al., 2019). By studying the role of *TM2D* genes and proteins  
555 in embryonic Notch signaling, phagocytosis and age-dependent neuronal maintenance, we will likely  
556 understand the precise molecular function of this evolutionarily conserved understudied protein family,  
557 which may lead to further understanding of molecular pathogenesis of AD and other human diseases.  
558 Considering the phenotypic similarities of *amrt* and *bisc* to *amx* in *Drosophila* neurogenesis, the similarities  
559 between *TM2D1-3* in human cells in the context of phagocytosis, and the similarities of *Tm2d1-3* knockout  
560 mice in the context of embryogenesis, we propose that rare genetic variants, epigenetic regulators or  
561 proteomic changes in other *TM2D* genes may reveal novel risk factors or biomarkers in epidemiologic study  
562 of AD and other forms of dementia.

563

#### 564 **Acknowledgements**

565 This work was supported by the Alzheimer's Association New Investigator Research Grant (NIRG-15-  
566 364099) and Nancy Chang, Ph.D. Award for Research Excellence to S.Y. P.C.M. is supported by the  
567 Canadian Institutes of Health Research (MFE-164712). Confocal imaging performed in this study was  
568 supported by the Eunice Kennedy Shriver Intellectual and Developmental Disabilities Research Center  
569 (IDDRRC) at Baylor College of Medicine (P50-HD10355). We are grateful to Danqing Bei and Hongling  
570 Pan for *Drosophila* microinjections. We acknowledge the Knockout Mouse Phenotyping Project (KOMP2)  
571 and International Mouse Phenotyping Consortium (IMPC) for the generation and phenotyping of  
572 *Tm2d1-3* knockout mouse strains. We thank Dr. Oguz Kanca for technical advice and useful suggestions.  
573 We thank Drs. Joshua Shulman, Hugo Bellen, Bart De Strooper, Katrien Horr , Motoo Kitagawa, Wataru



574 Masuda, Kenji Matsuno and Tomoko Yamakawa for valuable discussions. We thank Shelley Gibson and  
575 J. Michael Harnish for helpful comments on the manuscript.

576

## 577 **Materials and Methods**

### 578 ***Drosophila* strains and fly husbandry**

579 *Drosophila melanogaster* stocks used in this study are listed in the **Key Resources Table**. Some strains  
580 were generated in house for this study (see below), and others were obtained from Bloomington *Drosophila*  
581 Stock Center and other sources. Flies were kept on standard media and maintained at room temperature  
582 (21-23 °C). Crosses were performed at 25 °C in an incubator unless otherwise stated.

583

### 584 **Genotype of Flies used in each Figure panel**

585 The genotypes of the flies shown in each figure panel are listed in the table below:

| <b>Figure 1 panel(s)</b> | Genotype                                              |
|--------------------------|-------------------------------------------------------|
| C,D                      | Embryos from <i>y, w, amx<sup>A</sup></i>             |
| C,E                      | Embryos from <i>y, w, amx<sup>A</sup>; amx</i>        |
| C,F                      | Embryos from <i>y, w, amx<sup>A</sup>; 3xHA::amx</i>  |
| C,G                      | Embryos from <i>y, w, amx<sup>A</sup>; TM2D3</i>      |
| <b>Figure 2 panel(s)</b> |                                                       |
| C,E                      | Embryos from <i>y, w, amrt<sup>A</sup></i>            |
| D,E                      | Embryos from <i>y, w, amrt<sup>A</sup>; amrt</i>      |
| G,I                      | Embryos from <i>y, w; bisc<sup>A</sup></i>            |
| H,I                      | Embryos from <i>y, w; bisc<sup>A</sup>; bisc::GFP</i> |

|                          |                                                                               |
|--------------------------|-------------------------------------------------------------------------------|
| <b>Figure 3 panel(s)</b> |                                                                               |
| B                        | Embryos from <i>y, w</i>                                                      |
| C                        | Embryos from <i>y, w, amx<sup>A</sup>, amrt<sup>A</sup></i>                   |
| D                        | Embryos from <i>y, w, amx<sup>A</sup>, amrt<sup>A</sup>; bisc<sup>A</sup></i> |
| E,H,K                    | <i>y, w</i>                                                                   |
| F,I,L                    | <i>y, w, amx<sup>A</sup>, amrt<sup>A</sup></i>                                |
| G,J,M                    | <i>y, w, amx<sup>A</sup>, amrt<sup>A</sup>; bisc<sup>A</sup></i>              |
| <b>Figure 4 panel(s)</b> |                                                                               |
| B                        | <i>y, w; UAS-3xHA::amx<sup>FL</sup> / +; pnr-GAL4/+</i>                       |
| C,G                      | <i>en-GAL4, UAS-myr::mRFP, NRE-GFP / UAS-3xHA::amx<sup>FL</sup></i>           |
| E                        | <i>y, w; UAS-3xHA::amx<sup>AECD</sup> / +; pnr-GAL4/+</i>                     |
| F,H                      | <i>en-GAL4, UAS-myr::mRFP, NRE-GFP / UAS-3xHA::amx<sup>AECD</sup></i>         |
| <b>Figure 5 panel(s)</b> |                                                                               |
| B,H                      | <i>nub-GAL4, UAS-CD8::mCherry / UAS-N<sup>ICD</sup></i>                       |
| C,H                      | <i>nub-GAL4, UAS-CD8::mCherry / UAS-N<sup>EXT</sup></i>                       |
| D,H                      | <i>nub-GAL4, UAS-CD8::mCherry / UAS-N<sup>EGF1-18.LNR</sup></i>               |
| E,H                      | <i>nub-GAL4, UAS-3xHA::amx<sup>AECD</sup> / UAS-N<sup>ICD</sup></i>           |
| F,H                      | <i>nub-GAL4, UAS-3xHA::amx<sup>AECD</sup> / UAS-N<sup>EXT</sup></i>           |
| G,H                      | <i>nub-GAL4, UAS-3xHA::amx<sup>AECD</sup> / UAS-N<sup>EGF1-18.LNR</sup></i>   |
| I                        | <i>dpp-GAL4, UAS-CD8::mCherry / UAS-lacZ</i>                                  |
| J                        | <i>UAS-3xHA::amx<sup>AECD</sup>/+; dpp-GAL4, UAS-CD8::mCherry/+</i>           |
| K                        | <i>dpp-GAL4, UAS-CD8::mCherry / UAS-shPsn</i>                                 |
| <b>Figure 6 panel(s)</b> |                                                                               |
| A,B,D,E,F,G              | <i>y, w, amx<sup>A</sup></i>                                                  |
| A,D,E,F,G                | <i>y, w, amx<sup>A</sup>; amx</i>                                             |

|                               |                                                                                                  |
|-------------------------------|--------------------------------------------------------------------------------------------------|
| B,D,E,F,G                     | <i>y, w, amx<sup>A</sup>; 3xHA::amx</i>                                                          |
| A,D,E,F,G                     | <i>y, w, amx<sup>A</sup>; TM2D3</i>                                                              |
| <b>Sup. Figure 2 panel(s)</b> |                                                                                                  |
| A, B                          | <i>y, w</i>                                                                                      |
| A                             | <i>y, w, amx<sup>A</sup></i>                                                                     |
| A                             | <i>y, w, amrt<sup>A</sup></i>                                                                    |
| A                             | <i>y, w; bisc<sup>A</sup></i>                                                                    |
| B                             | <i>y, w, amx<sup>A</sup>, amrt<sup>A</sup></i>                                                   |
| B                             | <i>y, w, amx<sup>A</sup>, amrt<sup>A</sup>; bisc<sup>A</sup></i>                                 |
| <b>Sup. Figure 3 panel(s)</b> |                                                                                                  |
| A                             | <i>nub-GAL4, UAS-CD8::mCherry</i>                                                                |
| B                             | <i>nub-GAL4, UAS-CD8::mCherry / UAS-N<sup>FL</sup></i>                                           |
| <b>Sup. Figure 4 panel(s)</b> |                                                                                                  |
| A                             | <i>nub-GAL4 / UAS-3xHA::amx<sup>AECD</sup></i>                                                   |
| B                             | <i>nub-GAL4, UAS-3xHA::amx<sup>AECD</sup> / nub-GAL4, UAS-3xHA::amx<sup>AECD</sup></i>           |
| C                             | <i>UAS-3xHA::amx<sup>FL</sup> / +; dpp-GAL4 / +</i>                                              |
| D                             | <i>UAS-3xHA::amx<sup>AECD</sup> / +; dpp-GAL4 / +</i>                                            |
| <b>Sup. Figure 5 panel(s)</b> |                                                                                                  |
| A                             | <i>hsFLP; tub-Gal80<sup>S</sup>, FRT40A / kuz<sup>e29-4</sup>, FRT40A; tub-GAL4, UAS-GFP / +</i> |
| <b>Sup. Figure 7 panel(s)</b> |                                                                                                  |
| A                             | <i>y, w, amx<sup>A</sup>; amx</i>                                                                |
| A                             | <i>y, w, amx<sup>A</sup>; 3xHA::amx</i>                                                          |
| B                             | <i>y, w</i>                                                                                      |
| B                             | <i>y, w; 3xHA::amx</i>                                                                           |

## 587 **Generation of N<sup>3</sup>-3xHA tagged full-length and truncated *amx* overexpression transgenes**

588 The cDNA templates used to generate the UAS constructs for 3xHA epitope tagged full-length and  
589 truncated Amx were synthesized by Genewiz®. The *amx* open reading frame was based on the coding  
590 sequence of the genomic rescue construct we reported in (Jakobsdottir et al., 2016). A 3xHA epitope  
591 sequence (N<sup>3</sup>-YPYDVPDYAGYPYDVPDYAGSYPYDVPDYA-C<sup>3</sup>) was inserted after the signal  
592 sequence (SS) as predicted by SignalP 4.1 (<http://www.cbs.dtu.dk/services/SignalP-4.1>) and Phobius  
593 (<http://phobius.sbc.su.se>). A 968 bp fragment corresponding to 3xHA tagged full-length Amx was  
594 synthesized with NotI and XbaI restriction sites on the 5' and 3' end respectively. Furthermore, a 464 bp  
595 fragment corresponding to 3xHA::amx<sup>ΔECD</sup> was designed based on the full-length 3xHA::Amx construct,  
596 but with the majority of the endogenous Amx N<sup>3</sup>-end removed leaving the SS, epitope tag, and TM2  
597 domains intact. We subcloned the synthesized fragments into pUASTattB (Bischof et al., 2007) via  
598 restriction enzyme cloning utilizing the NotI and XbaI cut sites. We then injected the final plasmids into  
599 VK37 (*PBac{y[+]-attP}VK00037*) attP docking site (Venken et al., 2006) and injected animals were  
600 crossed to *y w* and screened for the presence of the *white*<sup>+</sup> marker encoded in the pUASTattB backbone in  
601 a *white*<sup>-</sup> background. Positive animals were then crossed to *SM6a* to create a balanced stock. One line each  
602 was chosen for this study.

603

## 604 **Generation of a N<sup>3</sup>-tagged *amx* genomic transgene**

605 The 3xHA::amx genomic rescue transgene was designed and constructed based on the non-tagged genomic  
606 rescue construct we reported in (Jakobsdottir et al., 2016). A ~3.3kb region including the full *amx* gene has  
607 the ability to fully rescue the maternal effect neurogenic phenotype of *amx*<sup>l</sup> (Jakobsdottir et al., 2016) and  
608 *amx*<sup>Δ</sup> (this study). We inserted a 3xHA sequence into the pattB-*amx* genomic rescue construct described in  
609 (Jakobsdottir et al., 2016) via NEBuilder® HiFi DNA Assembly. 3xHA was inserted after the predicted  
610 signal sequence (N<sup>3</sup>-ATMRLQRQCIVVNMRSIAIVLIMIFVLTGIRNSET-C<sup>3</sup>) to tag Amx at its N<sup>3</sup>.

611 pUASTattB-3xHA::amx<sup>FL</sup> described above was used as a template to amplify and add appropriate  
612 homology arms to the SS-3xHA::Amx DNA sequence with the primers 5'-  
613 CCCCCTCTATCTGACCAAAGCCACCATGAGGCTCCAACGAC-3' and 5'-  
614 AAAACTAACTAAGAACGGACTACTATATGTAAAGTGAGCCATCCGC-3' using Q5® High-  
615 Fidelity 2X Master Mix (M0492S, NEB). The section of pattB-amx plasmid containing the *amx* regulatory  
616 elements was linearized by PCR using Q5 polymerase and primers 5'-  
617 CGTTGGAGCCTCATGGTGGCTTTGGTCAGATAGAGCG-3' and 5'-  
618 GCTCACTTTACATATAGTAGTCCGTTCTTAGTTTACAGGGGT-3', which add appropriate  
619 homology arms to allow for assembly with the 3xHA::Amx fragment. The construct was assembled  
620 following the protocol described by NEBuilder® HiFi DNA Assembly Master Mix (NEB Catalog  
621 #E2621S) and confirmed by Sanger sequencing. The validated construct was injected into embryos  
622 expressing  $\phi$ C31 integrase with a 2<sup>nd</sup> chromosome *attP* docking site (VK37) (Venken et al., 2006).  
623 Transgenic flies were isolated based on eye color (*w*<sup>+</sup> encoded by the *mini-white* gene in pattB vector) and  
624 balanced over *SM6a*.

625

## 626 **Generation of the *amrt*<sup>A</sup> mutant**

627 The *amrt* (*CG11103*) null allele was created based on a method we described in (Li-Kroeger et al., 2018).  
628 We selected gRNA (guide RNA) target sites using CRISPR Optimal Target Finder  
629 (<http://targetfinder.flycrispr.neuro.brown.edu/>). sgRNAs (single gRNA) expressing plasmid was generated  
630 using the pCFD3-dU6:3 gRNA vector (Plasmid ID: #49410, Addgene) as described in (Port et al., 2014).  
631 Oligo DNA to generate the upstream sgRNA plasmid were 5'-GTCGCGCTGCGTGCCTGTATCGCT-3'  
632 and 5'-AAACAGCGATACAGGCACGCAGCG-3'. Oligo DNA to generate the downstream sgRNA  
633 plasmid were 5'-GTCGTCCTCGGGCAGCAAATTGT-C' and 5'-  
634 AAACACAATTTGCTGCCCGAGGA-3'. Donor plasmid containing the *yellow*<sup>body+</sup> marker (*y*<sup>body+</sup>) to be

635 integrated into the *amrt* locus via HDR was generated through NEBuilder® HiFi DNA Assembly. Primers  
636 amplifying and adding homology arms to a pBH vector (Housden and Perrimon, 2016) backbone were 5'-  
637 GATGCTGTTAGACTAACGGTGTATATCTAGAGCCGTCCCGTCAAG-3' and  
638 5'-CCGCAAGCAATGGCCAAACTGGGTCCTCGAGTCGACGTTG-3'. Primers for amplifying the  
639 *ybody*<sup>+</sup> insert and adding homology arms from P{ybody+} plasmid (Li-Kroeger et al., 2018) were  
640 5'-CAGACAACACGATGCCCAAGCGGATCGCTTGATGTTGTTTTGTTTTG-3' and  
641 5'-TGCCGTCCTCGGGCAGCAAATGGAAGGAACCTGCAGGTCAACG-3'. All plasmids were  
642 verified by Sanger sequencing. *y, w, iso#6(X); attP2{nos-Cas9}* (Li-Kroeger et al., 2018) embryos were  
643 injected with 25 ng/ul concentration of each sgRNA plasmid mixed with 150 ng/ul of the *y*<sup>body+</sup> donor  
644 plasmid. Resulting adults were crossed to *y w* animals and offspring screened for the presence of the *y*<sup>body+</sup>  
645 marker (dark body color instead of yellow body). Positive animals were crossed to the *FM7c* balancer to  
646 establish the lines and were molecularly genotyped (see below).

647

#### 648 **Generation of the *bisc*<sup>A</sup> mutant**

649 The *bisc* (*CG10795*) null allele was generated using the same strategy discussed above that was used to  
650 generate the *amrt* null allele. Oligo DNAs to generate the upstream sgRNA plasmid were 5'-  
651 GTCGTATGAGGGACCATGTACAT-3' and  
652 5'-AAACATGTACATGGTCCCTCATA-3'. Oligo DNA to generate the downstream sgRNA plasmid  
653 were 5'-GTCGAGGCGGTGGTGGTGTCTGT-3' and 5'-AAACACAGAACACCACCACCGCCT-3'.  
654 Primers amplifying and adding homology arms to a pBH vector backbone were  
655 5'-GTAGACACACGGCATAGATGGTATATCTAGAGCCGTCCCGTC-3' and  
656 5'-GAAGAAGTTGACAATGTGTTGGGTCCTCGAGTCGACGTTG-3'. Primers for amplifying the  
657 *ybody*<sup>+</sup> insert and adding homology arms from p{ybody+} plasmid were

658 5'-AATTGTATGAGGGACCATGTAGGATCGCTTGATGTTGTTTTG-3' and  
659 5'-GTTGACCTGCAGGTTCTGTTGGCGGGAGCTCTTTCTC-3'. All plasmids were verified by  
660 Sanger sequencing. *y, w; iso#2(2); attP2{nos-Cas9}* embryos were injected with 25 ng/ul concentration of  
661 each sgRNA plasmid mixed with 150 ng/ul of the *y<sup>body+</sup>* donor plasmid. Resulting adults were crossed to *y,*  
662 *w* animals and offspring screened for the presence of the *y<sup>body+</sup>* marker. Positive animals were crossed to the  
663 *SM6a* balancer to establish the lines and were molecularly genotyped (see below).

664

#### 665 **RT-PCR verification of mRNA expression in null mutant flies for *TM2D* genes**

666 The presence or absence of mRNA corresponding to *TM2D* genes were determined using RT-PCR (Reverse  
667 Transcription-Polymerase Chain Reaction). Whole body RNA was isolated from adult animals through  
668 standard TRIzol/chloroform RNA extraction protocol. We prepared cDNA with iScript™ Reverse  
669 Transcription Supermix, (#1708840, BioRad). PCR was done using Q5 polymerase (M0492S, NEB).  
670 Primers used to detect the presence of *amx* cDNA were 5'-TCCCCGCTCTATCTGACCAA-3' and 5'-  
671 GCTCTGTTGCCACATTTCCG-3'. Primers to detect the presence of *amrt* cDNA were 5'-  
672 CTACGGACTACTGGCGTTCC-3' and 5'-CCCGTTTGACCGAGACAGAA-3'. Primers to detect the  
673 presence of *bisc* cDNA were 5'-CCCCGCGAACTGCAATAAAC-3' and 5'-  
674 CACAACCTGCAGGGCTATCA-3'. Primers targeting *TM2D* cDNA were annealed at 68° C, extended for  
675 30s at 72° C for 30 cycles. Primers for control gene *rp49* were 5'-TCTGCATGAGCAGGACCTC-3' and  
676 5'-CGGTTACGGATCGAACAAG-3' (Li et al., 2014); annealed at 64° C and extended 30s for 30 cycles.

677

#### 678 **Generation of an *amrt* genomic rescue construct**

679 Genomic DNA was isolated from *y, w, iso#6; +/+; attP2{nos-Cas9}* animals using PureLink Genomic  
680 DNA Mini Kit (Cat no. K1820-01, Invitrogen). Genomic region fully containing the *amrt* (*CG11103*) locus

681 and neighboring sequences was amplified by PCR using the primers 5'-  
682 TATATACTCGAGGcgcgaaacttctgattcc-3' and 5'-TATATAGAATTCatcgaatgtagagatgggc-3' (small  
683 letters indicate annealing region) which added EcoRI and XhoI restriction sites for follow-up cloning into  
684 the pattB vector (Bischof et al., 2007). The pattB-amrt plasmid was injected into VK37 (Venken et al.,  
685 2006) docking site on the second chromosome. Eclosed animals were crossed to *y, w* and screened for the  
686 *w*<sup>+</sup> marker in the subsequent generation. Positive animals were then crossed to *SM6a* to create a balanced  
687 stock.

688

### 689 **Generation of *biscotti::GFP* fosmid transgenic line**

690 A ~40kb genomic fosmid construct in which *bisc* is C'-tagged with GFP and other epitopes (Sarov et al.,  
691 2016) (*bisc::GFP*, FlyFos021003, *Drosophila* TransgeneOme Resource ID: CBGtg9060C1139D) was  
692 obtained from Source BioScience. Bacterial colonies were provided to GenetiVision Corp. for DNA  
693 preparation, injection into VK33 (*PBac{y[+]-attP}VK00033*) on the third chromosome (Venken et al.,  
694 2006), selection, and balancing of fly lines using the *TM3, Sb* balancer. Three independent lines were  
695 generated and all three behaved in a similar manner. One line was chosen for the experiments performed in  
696 this study.

697

### 698 **Creation of Notch overexpression transgenic lines (*UAS-Notch*)**

699 All transgenic constructs were generated by Gateway® (Thermo Fisher Scientific) cloning into the pUASg-  
700 HA.attB plasmid (Bischof et al., 2007). First, we generated Gateway compatible plasmid that contains the  
701 full-length Notch open reading frame. We subcloned the full-length *Notch* (*N<sup>FL</sup>*) open reading frame into  
702 the pDONR223 plasmid based on a cDNA clone provided by Dr. Spyros Artavanis-Tsakonas (Wharton et  
703 al., 1985), which was mediated by a Gateway reaction using BP clonase II (Thermo Fisher Scientific,  
704 #11789100) following a PCR reaction and addition of attB sites to the amplicon (Harnish et al., 2019;



705 Marcogliese et al., 2018). Truncated *Notch* constructs were generated by Q5 site-directed mutagenesis  
706 (NEB) with the following primers:

707  $N^{EXT}$ : 5'-GCGGCCAAACATCAGCTG-3' and 5'-GTGCATTTTGTTAATCCAAAAACAAATCC-3'.

708  $N^{ICD}$ : 5'-GTCTTGAGTACGCAAAGAAAG-3' and 5'-CATGGTGAAGCCTGCTTT-3'.

709  $N^{EGF1-18.LNR}$  (two-step mutagenesis): 5'-CTGAGCGATGTGGACGAGTGCGCATCGAAT-3' and 5'-  
710 CAACGCGGTATCAGTTCC-3' followed by mutagenesis with 5'-AACAAGACCCAGTCACCG-3' and  
711 5'-CATGGCACGTTGTTGCTC-3'.

712 All constructs were fully sequenced (Sanger), and cloned into pUASg-HA.attB via LR clonase II (Thermo  
713 Fisher Scientific, #11791020). All expression constructs were inserted into VK37 integration site (Venken  
714 et al., 2006). Two transgenic lines were established for each and one line each was used for this study.

715

## 716 **Embryo collection, staining and imaging**

717 Embryo collection, staining and imaging was performed as previously described (Jakobsdottir et al., 2016).  
718 In brief, virgin females that are homozygous for each or all *TM2D* gene mutations, with or without genomic  
719 rescue constructs, were crossed to males flies of the same genotype or *Canton-S* males, and allowed to mate  
720 in a vial for 24 hrs. Flies were then transferred to a bottle with a grape juice plate supplemented with active  
721 yeast and allowed to lay eggs overnight. Embryos were then gently collected using a paint brush and their  
722 chorions were removed by 1.5 minute incubation in 66% bleach. Dechorionated embryos were then washed  
723 with water and fixed in 4% paraformaldehyde/PBS(phosphate buffered saline)/n-heptane solution for 30  
724 minutes at room temperature. Fixed embryos were washed and stored in 100% methanol at -20°C until use.  
725 Fixed embryos were rehydrated and rinsed with 0.03% Triton-X in PBS (PBST). A primary antibody to  
726 label neuronal nuclei [anti-Elav, rat monoclonal (7E8A10) (O'Neill et al., 1994), 1:200, Developmental  
727 Studies Hybridoma Bank (DSHB)] was applied in a solution of PBST/5% normal donkey serum

728 (NDS)/0.1% NaN<sub>3</sub> overnight at 4°C. Embryos were further washed with PBST upon removal of the primary  
729 antibody, and a secondary antibody (donkey anti-rat-Alexa488, 1:500; Jackson ImmunoResearch #712-  
730 545-153) was applied for 1 hour at room temperature. Stained embryos were washed in PBST and mounted  
731 onto glass slides using Vectashield<sup>®</sup> with DAPI (4',6-diamidino-2-phenylindole, Vector labs). Embryos  
732 were imaged using Ti2E Spinning Disc confocal microscope (Nikon) and images analyzed using NIS  
733 software (Nikon).

734

### 735 **Egg hatching assay**

736 Egg hatching assay was performed as previously described (Jakobsdottir et al., 2016). Embryos were  
737 collected and dechorionated as described above. Dechorionated embryos were suspended in PBS and placed  
738 in 12-well cell culture dishes. The dishes were then placed in a 25°C incubator for 24 hours. The ratio of  
739 hatched to unhatched embryos after the 24 hour period was recorded for each genotype and used to calculate  
740 hatching rate (%). This was repeated at least 3 times and statistical analysis and graph generation was  
741 performed using GraphPad Prism 9.0 software. We performed one-way ANOVA followed by Dunnett test  
742 or t-test. \*\*\*\* = p-value ≤0.0001.

743

### 744 **Imaging of adult flies**

745 Heads and wings from adult flies were removed from the body using fine dissection scissors and imaged  
746 directly using a MZ16 microscope (Leica) with attached Microfire camera (Optronics) using ImagePro Plus  
747 5.0 acquisition software (Media Cybernetics). Extended focus function was used to obtain deep focus  
748 images out of Z-stack images. Imaging of the dorsal thoraxes (nota) were described in (Yamamoto et al.,  
749 2012) with slight modifications. In brief, legs, head, and abdomen were removed from thoraxes with fine  
750 dissection scissors. Then, the dissected thoraxes were then placed in 10% KOH at 95°C. for 10 min to  
751 dissolve soft tissue. Thoraxes were then further trimmed with scissors prior to imaging and mounted on a

752 glass slide with spacers using 75% glycerol/25% ethanol solution. Photos were taken using microscope  
753 system and imaging software as above.

754

#### 755 **Immunostaining and imaging of *Drosophila* wing imaginal discs and ovaries:**

756 Wing discs from wandering larvae and ovaries from females were dissected in 1x PBS and fixed for 30  
757 minutes in 4% paraformaldehyde in PBS. Tissues were then washed with 0.2% PBST. Primary antibodies  
758 [mouse anti-Notch intracellular domain (NICD) (1:50; DSHB, C17.9C6), mouse anti-Cut (1:100; DSHB,  
759 2B10), rat anti-HA (1:100, Sigma-Aldrich, 11867423001)] were applied in 0.2% PBST with 5% NDS/0.1%  
760  $\text{NaN}_3$  overnight at 4°C. Tissue was then washed with 0.2% PBST 3 times, 15 minutes and secondary  
761 antibodies/stains [donkey anti-rat IgG-Cy3 (1:500; Jackson ImmunoResearch #712-165-153) donkey anti-  
762 mouse IgG-Alexa-647 (1:500; Jackson ImmunoResearch #715-605-151), donkey anti-mouse Alexa-488  
763 (1:500; Jackson ImmunoResearch #715-545-151), and Alexa-488 Phalloidin (1:1000; ThermoFisher  
764 A12379)] were applied in 0.2% PBST/NDS for 2 hours at room temperature. Tissues were washed with  
765 0.2% PBST and mounted in Vectashield® with DAPI (Vector labs). Images were taken with LSM 710  
766 Confocal Microscope (Zeiss).

767

#### 768 **Notch epistasis assay**

769 *UAS-Notch* lines were crossed to either *nub-GAL4*, *UAS-CD8::mCherry* (control) or *nub-GAL4*, *UAS-*  
770 *amx*<sup>*AECD*</sup> flies. Wing discs from 3<sup>rd</sup> instar larvae were dissected out, fixed washed and stained for Cut as  
771 described earlier. Cut intensity within the wing pouch was quantified using ImageJ. Graph generation and  
772 statistical analysis was performed with GraphPad Prism software version 9.0. One way t-test was used to  
773 compare experiments. \*=  $p \leq 0.05$ . \*\*\*\*=  $p \leq 0.0001$

774

775 **MARCM analysis**

776 The following fly lines were used for MARCM (Lee and Luo, 1999) analysis:

777 *hsFLP; tub-Gal80<sup>ts</sup>, FRT40A/CyO; tub-GAL4, UAS-GFP/TM6b, Tb* (Yang and Deng, 2018)

778 *kuz<sup>e29-4</sup>, FRT40A/CyO* (Rooke et al., 1996)

779 Flies were crossed and maintained at 25°C. First-instar larvae (36-48 hours after egg laying) were heat  
780 shocked for 40 minutes twice a day at 37°C. Wing discs were dissected in 1×PBS from wandering larvae  
781 (108-120 hours after egg laying). Discs were then fixed in 4% paraformaldehyde in PBS for 20 minutes at  
782 room temperature. Fixed discs were washed with 0.2% PBST. A mouse anti-Notch primary antibody  
783 (1:40; DSHB, C17.9C6, raised against the intracellular domain) was applied in 0.2% PBST with 5%  
784 NDS/0.1% NaN<sub>3</sub> overnight at 4°C. Discs were further washed with 0.2% PBST after primary antibody  
785 staining. A donkey anti-mouse-Cy3 secondary antibody (1:500; Jackson ImmunoResearch #715-165-151)  
786 in 0.2% PBST was applied for 2 hours at room temperature. Stained discs were washed with 0.2% PBST  
787 and mounted with Vectashield® with DAPI (Vector labs). Fluorescence Images were taken by LSM 710  
788 Confocal Microscope (Zeiss).

789

790 **Western blot of 3xHA::Amx**

791 To determine whether 3xHA::Amx is expressed in adult brains or ovaries, we performed western blot. Adult  
792 brains from *y, w; VK37{pattB-3xHA::amx}* flies were dissected out as described in (Tito et al., 2016). For  
793 ovaries, we mated the *y, w; VK37{pattB-3xHA::amx}* females flies to male flies of the same genotype while  
794 supplying plenty of active yeast to stimulate oogenesis for two days prior to protein isolation. Ovaries were  
795 then dissected out from the abdomen in cold (4°C) PBS. Dissected brains and ovaries were rinsed with cold  
796 PBS and placed immediately in cold 8M urea lysis buffer (8M urea, 10% glycerol, 0.5% SDS, 5% β-  
797 mercaptoethanol) with Halt™ Protease Inhibitor Cocktail 100X (Thermo Scientific, #78430) added before

798 lysis. We homogenized the brains or ovaries were via pestle in 15 uL of 8M urea lysis buffer. Homogenate  
799 was incubated for 30 minutes on ice, and 2x Laemmli Sample Buffer (Bio-Rad, #1610737) was added prior  
800 to gel loading. Best results were obtained when avoiding heating/boiling protein sample. Homogenate was  
801 loaded directly into Mini-PROTEAN® TGX™ 4-20% Precast Gels (Bio-Rad, #4561094). SDS-PAGE  
802 (Sodium Dodecyl Sulphate–PolyAcrylamide Gel Electrophoresis) was run for 30 minutes at 120V in  
803 Tris/Glycine/SDS buffer (BioRad, #1610732). Protein was then transferred onto PVDF membrane using  
804 Bio-Rad TransBlot Turbo system using the low molecular weight protocol. The membrane was blocked  
805 with 5% skim milk in 0.5% Tween-20/Tris-Buffered Saline (TBST) for 1 hour at room temperature and  
806 then washed 3 times for 5 minutes with TBST. A primary antibody (rat anti-HA, 1:1,000, Sigma, 3F10)  
807 was diluted in 5% fetal bovine serum/TBST and the membrane was incubated overnight at 4°C. The  
808 membrane was again washed with TBST and a secondary antibody (donkey anti-rat HRP, 1:5,000, Jackson  
809 ImmunoResearch, #712-035-150) was applied in 5% milk/TBST for 2 hours at room temperature. The  
810 membrane was washed again and imaged using SuperSignal™ West Femto Maximum Sensitivity Substrate  
811 (Thermo Scientific, 34096) and ChemiDoc imaging system (Bio-Rad) using default settings.

812

### 813 **Longevity assay of *amx*<sup>Δ</sup> flies**

814 To determine whether loss of *amx* causes lifespan defects, we compared the longevity of male flies that  
815 lack *amx* (*y, w, amx*<sup>Δ</sup>) to flies in which *amx* function has been rescued with genomic constructs that express  
816 wild-type Amx (*y, w, amx*<sup>Δ</sup>; *VK37{pattB-amx}*), N<sup>3</sup>-3xHA tagged Amx (*y, w, amx*<sup>Δ</sup>; *VK37{pattB-*  
817 *3xHA::amx}*) or human TM2D3 expressed under the control of fly *amx* regulatory elements (*y, w, amx*<sup>Δ</sup>;  
818 *VK37{pattB-TM2D3}*). Flies were reared and collected as described in (Linford et al., 2013). Ten animals  
819 were housed together in a single vial and flies were flipped to a new vial with fresh food every 2-3 days.  
820 Vials were kept in a 25°C incubator with a 12 hr light/dark cycle. Dead flies were recorded after every vial

821 flip. Generation of the Kaplan-Meier curve and statistical analysis was performed with GraphPad Prism  
822 9.0. We applied log-rank test (Mantel-Cox), \*\*\*\*= $p \leq 0.0001$ .

823

#### 824 **Electrophysiological recordings of the giant fiber system**

825 Electrophysiological recordings of the giant fiber system were performed with a protocol modified from  
826 (Tanouye and Wyman, 1980). Flies were first anesthetized on ice then transferred to a petri dish filled with  
827 soft dental wax; wings and legs were mounted in wax, ventral side down, using forceps. Five electrolytically  
828 sharpened tungsten electrodes were used: two for stimulating the giant fiber, one as a reference electrode,  
829 and two for recording from the TTM and DLM, respectively. To activate the giant fiber, two sharp tungsten  
830 electrodes were inserted into each eye and voltage stimulation was applied at different frequencies ranging  
831 from 0.5 Hz to 100 Hz. DLM and TTM responses were measured through the two electrodes implanted in  
832 the DLM and TTM.

833 For each adult fly, prior to applying high frequency stimulation on the giant fiber, low frequency  
834 stimulations at 0.5 Hz were applied after placing the two recording electrodes in TTM and DLM to ensure  
835 that the electrodes are recording from the proper muscles (the latency of responses for TTM: 0.8 ms and  
836 for DLM: 1.2 ms (Tanouye and Wyman, 1980). For the actual experiments, high frequency train  
837 stimulations of 20 pulses were delivered to the giant fiber at 20, 50 and 100 Hz in random order. Ten times  
838 repetitive stimulations were applied for each particular frequency train, interspersed with few minutes rests  
839 between two trains of stimuli (for 20 Hz, 1 minute resting; 50 Hz 2 minutes and 100 Hz 3 minutes). 0.5 Hz  
840 stimulations were used again after high frequency stimulation to confirm that electrodes were still in the  
841 proper muscle. The aforementioned process was considered as one biological sample. Stimuli of the  
842 crossing electrodes were fixed at a duration of 10 microseconds at 10–13 V of amplitudes through a stimulus  
843 isolation unit (Digitimer Ltd, model DS2A) and the frequency of train stimuli was controlled by LabChart  
844 Pro-8 acquisition software (ADInstruments). A microelectrode amplifier (A-M system, Model 1800) was

845 used for all recordings. PowerLab 4/35 (ADInstruments) was used for data acquisition. The probability of  
846 responses for one biological sample, under particular frequency of giant fiber stimulation, due to a particular  
847 stimulus, was calculated from the proportion of successful responses (out of 10) for both TTM and DLM  
848 pathways. The difference of 'probability of responses' between control and experimental samples (p-value)  
849 for each stimuli were calculated by multiple unpaired t-tests with Holm-Šídák correction for multiple  
850 comparisons using Graph Pad Prism 9.0. n.s.= not significant. \* =  $p \leq 0.05$ . \*\* =  $p \leq 0.01$ . \*\*\* =  $p \leq 0.001$ .  
851 \*\*\*\* =  $p \leq 0.0001$ .

852 **Figures and Figure Legends (Figures 1-6)**

853 **Figure 1.**

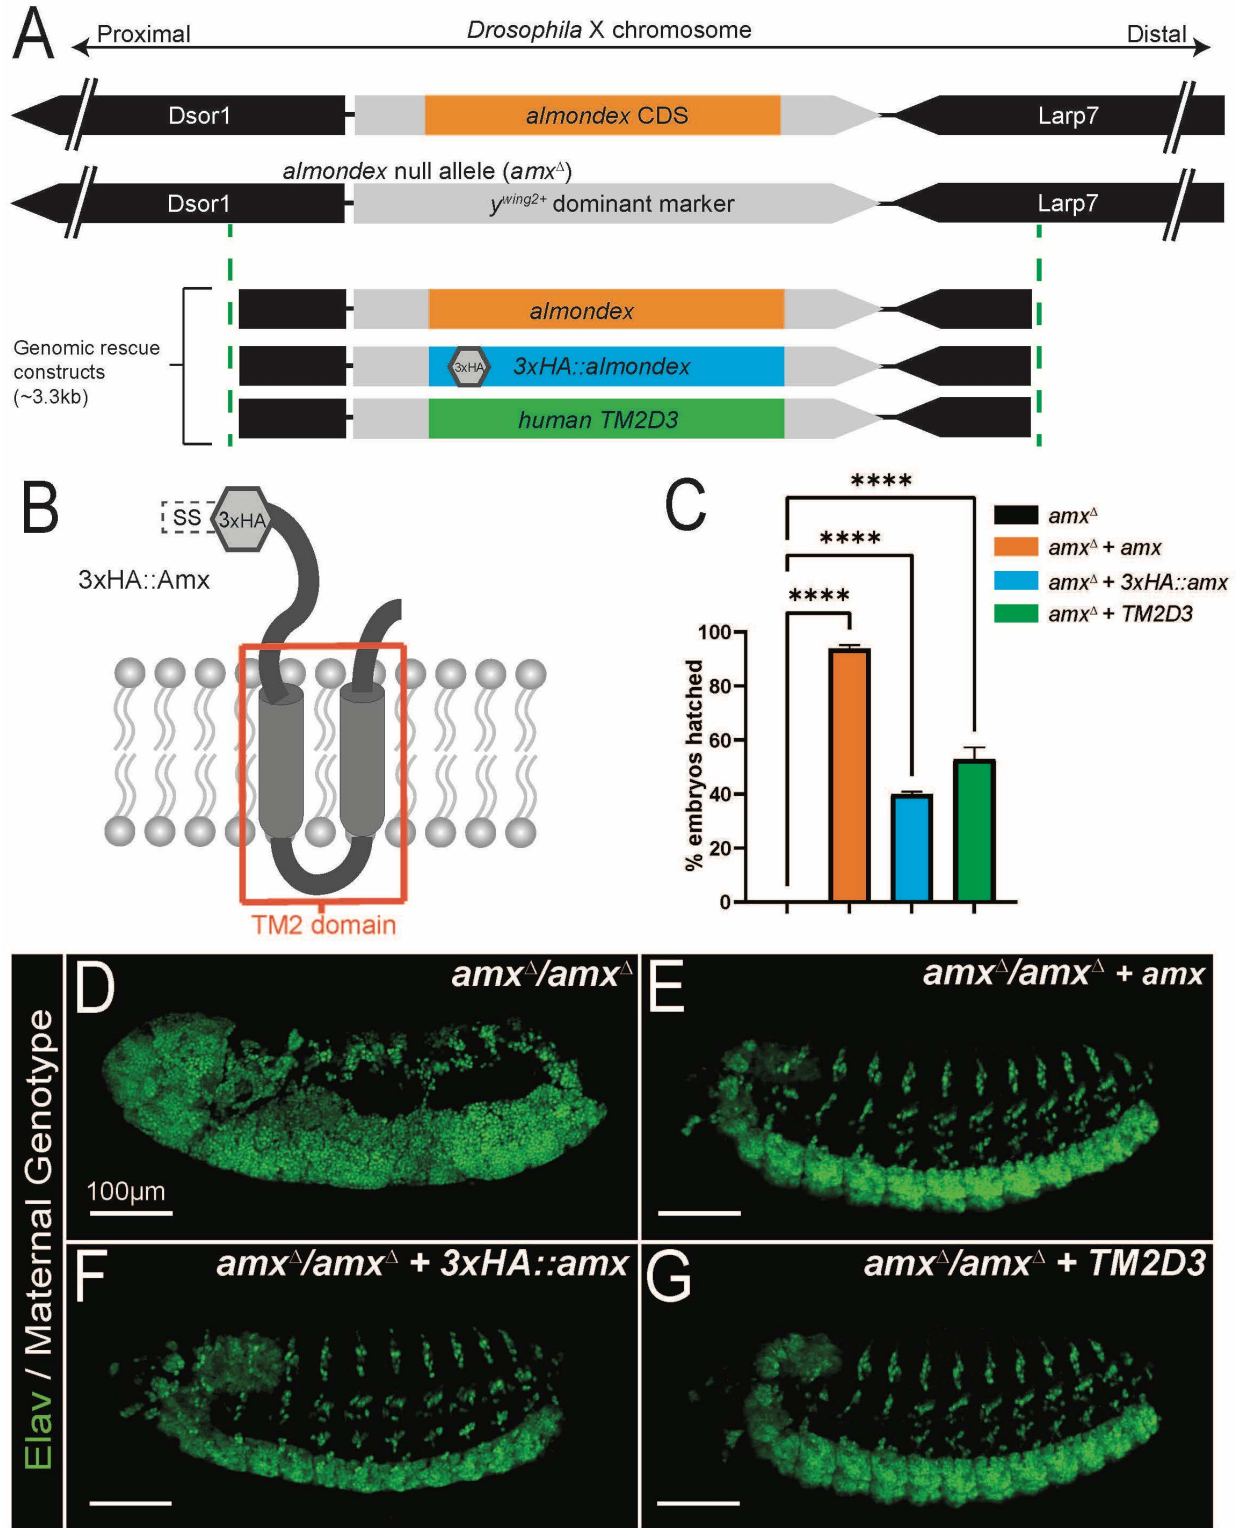

854



855 **Figure 1. A clean null allele of *TM2D3* fly ortholog *almondex* (*amx<sup>A</sup>*) behaves like the classic *amx<sup>l</sup>***  
856 **allele** (A) Schematic diagram of *almondex* (*amx*) locus, *amx<sup>A</sup>* allele and genomic rescue constructs used in  
857 this study. (B) Predicted 2D-structure of *Drosophila* Amx protein. SS = signal sequence for membrane  
858 localization. Transmembrane 2 (TM2) domain is boxed in red. Hexagon denotes where 3xHA epitope is  
859 located in 3xHA::*Amx* protein. (C) Egg hatching assay shows that genomic rescue constructs can suppress  
860 embryonic lethality (*amx<sup>A</sup>* n=857. *amx<sup>A</sup>* + *amx* n=139. *amx<sup>A</sup>* + 3xHA::*amx* n=1673. *amx<sup>A</sup>* + *TM2D3*  
861 n=257). Error bars show SEM. One-way ANOVA followed by Dunnett test. \*\*\*\* = p-value≤0.0001. (D-  
862 G) Embryonic nervous tissue (neuronal nuclei, Elav, green) of developing embryos. Embryos from  
863 homozygous *amx<sup>A</sup>* females (D) exhibit a neurogenic phenotype. This phenotype can be suppressed by wild-  
864 type *amx* (E), 3xHA::*amx* (F), or human *TM2D3* (G) genomic rescue constructs.

865 **Figure 2.**

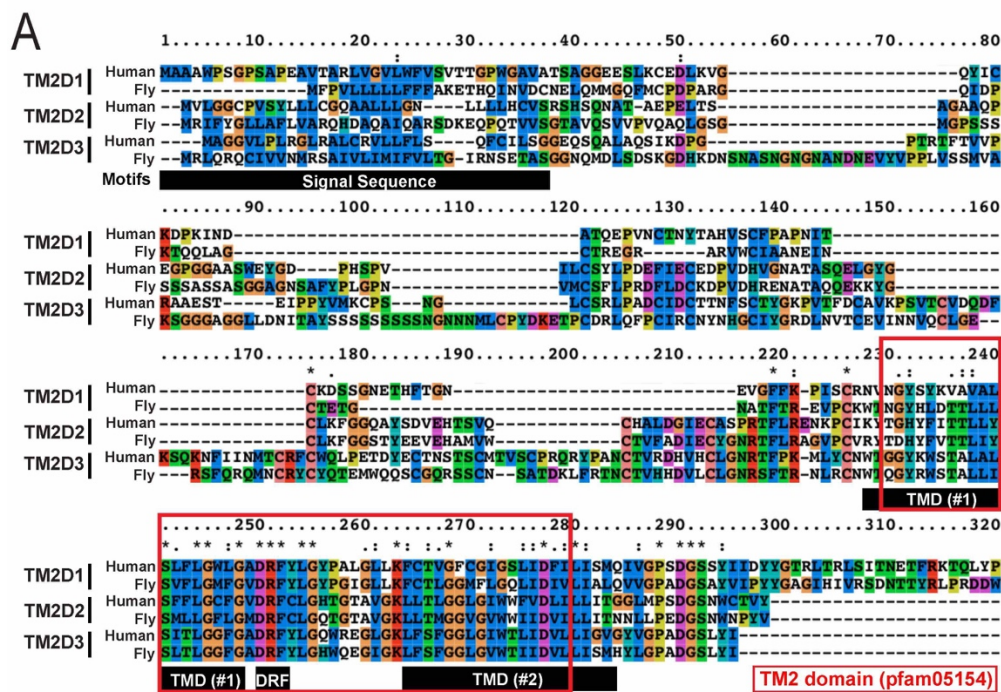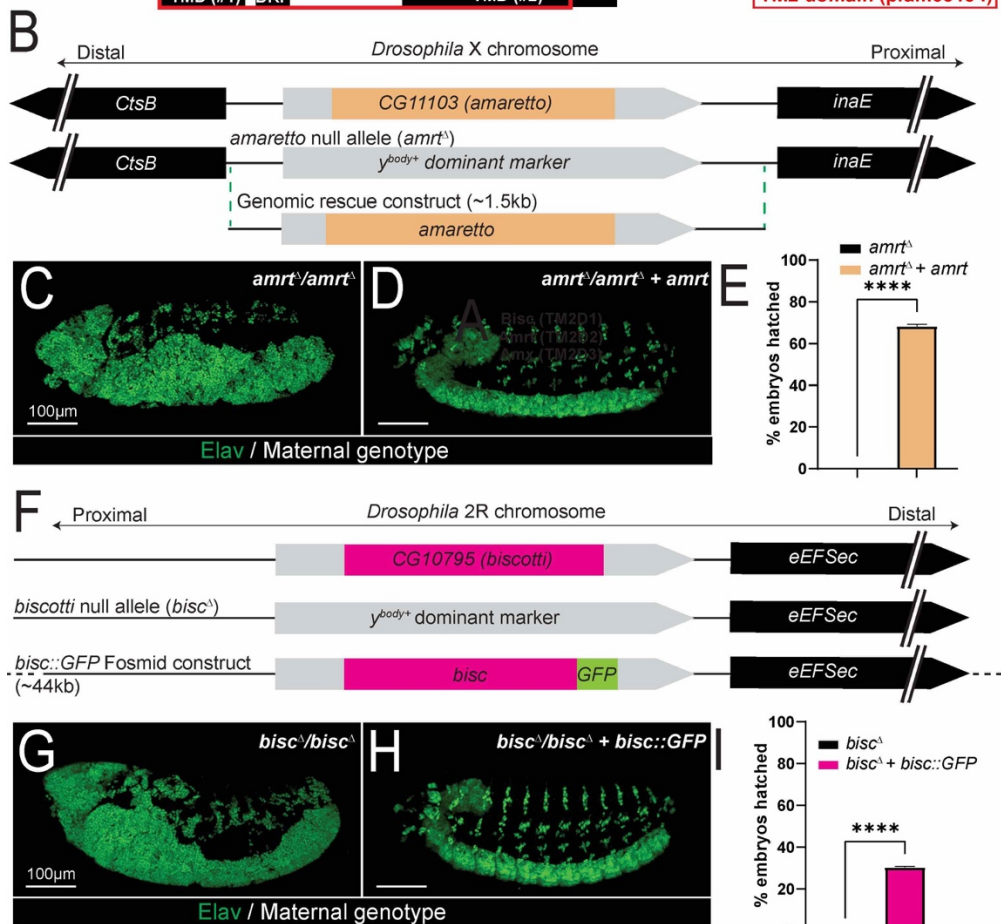

866

867 **Figure 2. Null alleles of fly orthologs of *TM2D2* (*CG11103/amrt*) and *TM2D1* (*CG10795/bisc*)**  
868 **phenotypically mimics the loss of *TM2D3* (*amx*).** (A) Protein alignment of human and *Drosophila* TM2D  
869 proteins. The TM2 domain (boxed in red) is composed of two transmembrane domains (TMD) and an  
870 intracellular DRF motif (denoted by black bars for TM2D3). (B) Schematic of *amaretto* (*amrt*) locus, *amrt*  
871 null allele (*amrt<sup>A</sup>*), and *amrt* genomic rescue plasmid construct generated for this study. (C) Embryos from  
872 homozygous *amrt<sup>A</sup>* females exhibit neurogenic phenotype, which can be suppressed by the *amrt* genomic  
873 rescue construct (D). (E) Egg hatching assay showing that *amrt* genomic rescue construct suppresses 68%  
874 of embryo lethality (*amrt<sup>A</sup>* n=954. *amrt<sup>A</sup>* + *amrt* n=1490). (F) Schematic of *biscotti* (*bisc*) locus, *bisc* null  
875 allele (*bisc<sup>A</sup>*), and *bisc::GFP* genomic rescue fosmid construct generated for this study. (G) Embryos from  
876 homozygous *bisc<sup>A</sup>* females exhibit neurogenic phenotype (n=379) which can be suppressed by *bisc::GFP*  
877 genomic rescue construct (H). (I) Egg hatching assay showing that *bisc::GFP* suppresses 30% of embryonic  
878 lethality (*bisc<sup>A</sup>* n=379. *bisc<sup>A</sup>* + *bisc::GFP* n=436). t-test, \*\*\*\* = p-value<0.0001.

879 **Figure 3.**

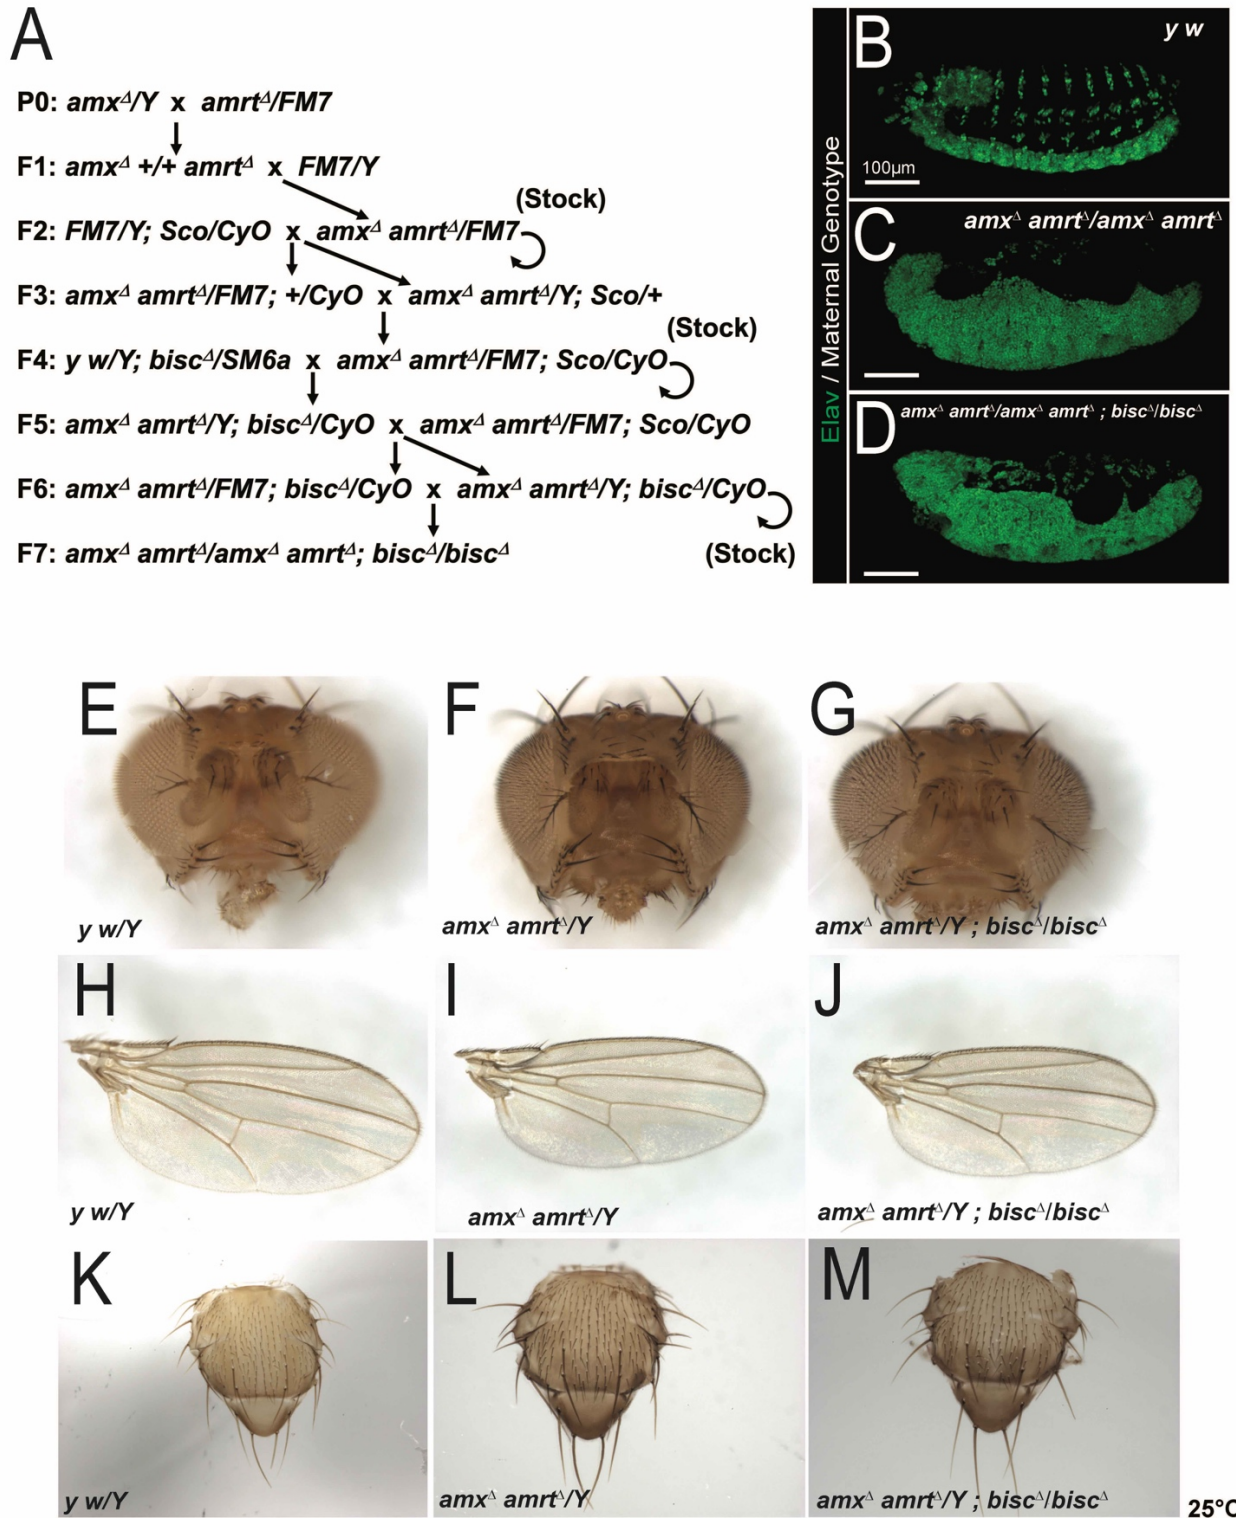

880

881 **Figure 3. Triple null mutant for all three *TM2D* fly genes is phenotypically similar to single null**  
882 **mutants.** (A) Crossing scheme used to generate *TM2D* triple null mutant flies. (B) A normal embryonic  
883 nervous system highlighted by neuronal nuclei marker Elav (green). (C-D) *amx<sup>Δ</sup> amrt<sup>Δ</sup>* double mutants (C)  
884 and *amx<sup>Δ</sup> amrt<sup>Δ</sup> bisc<sup>Δ</sup>* triple mutants (D) exhibit a neurogenic phenotype. (E-K) *TM2D* double and triple  
885 null mutants exhibit no overt morphological phenotypes. Head structures of mutants (F, G) appear normal  
886 compared to *y w* control (E). Mutant wings (I, J) and thorax (L, M) also appear normal compared to control  
887 (H, K).



888 **Figure 4.**

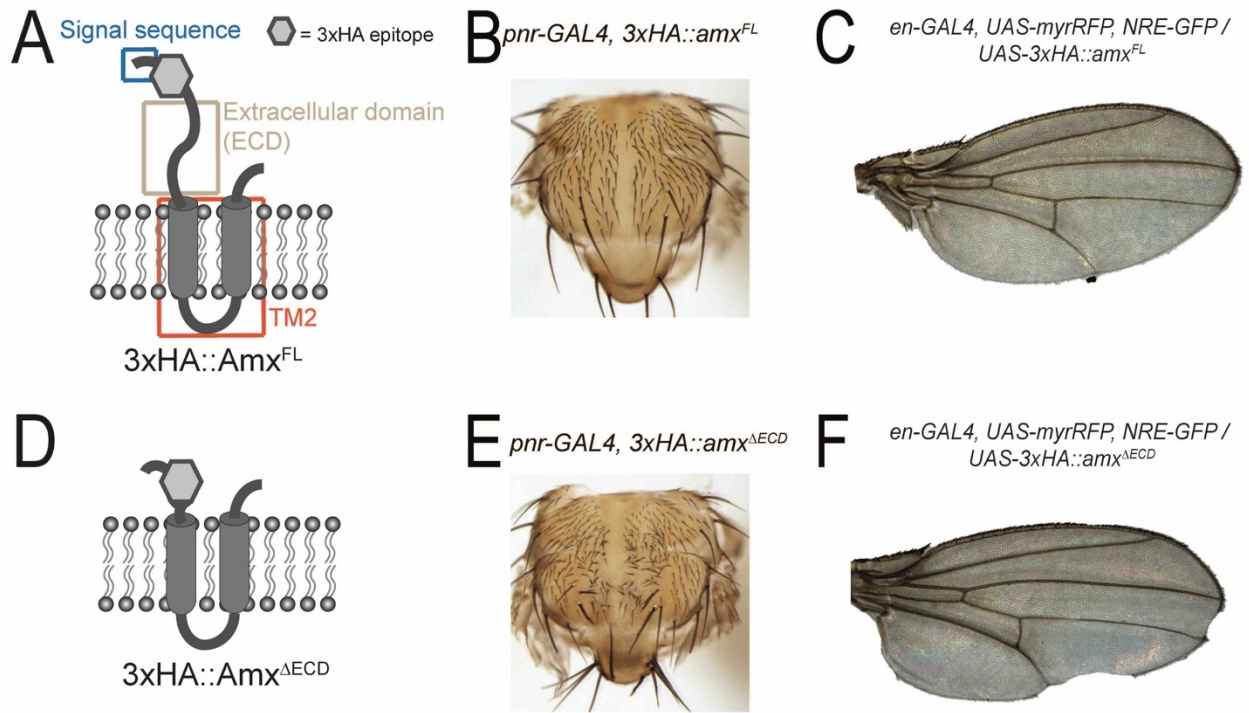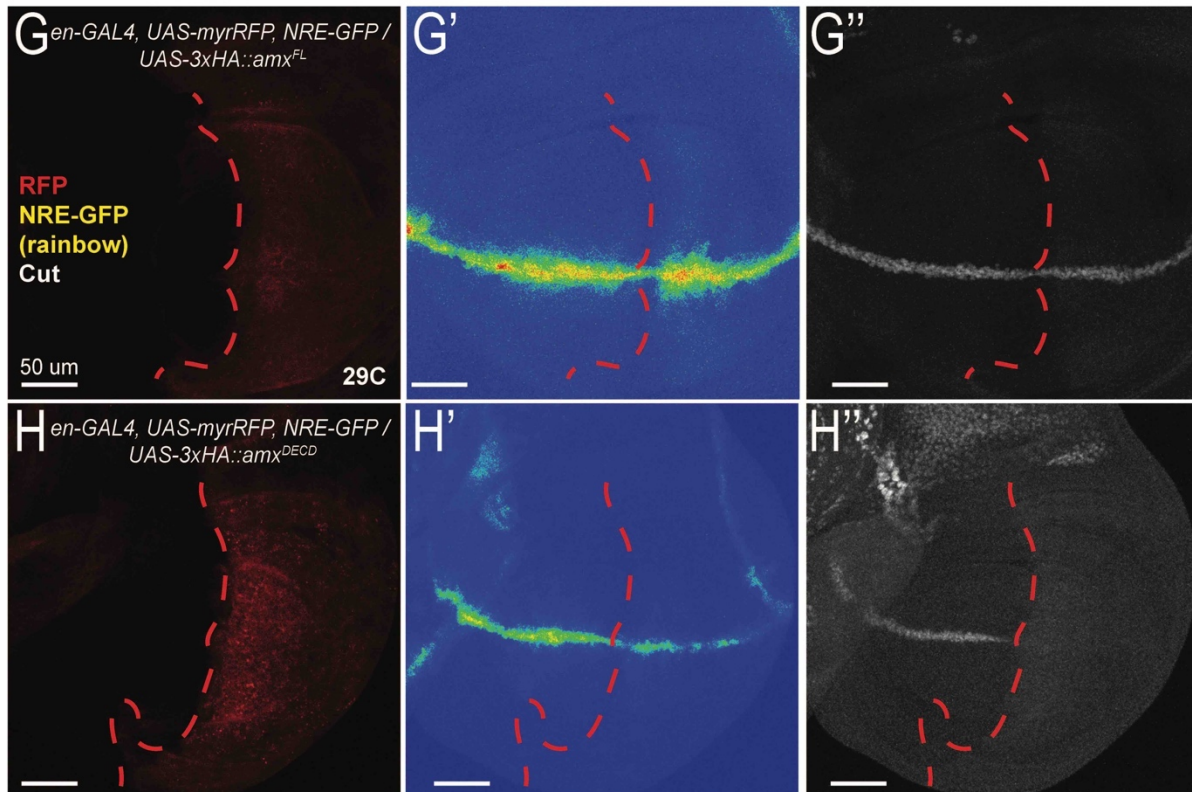

889

890 **Figure 4. Amx that only possesses the highly conserved TM2 domain is a potent inhibitor of Notch**  
891 **signaling.** (A, D) Schematic of proteins generated from *UAS-3xHA::amx<sup>FL</sup>* and *UAS-3xHA::amx<sup>ΔECD</sup>*  
892 transgenes. A 3xHA epitope (grey hexagon) was inserted after a predicted signal sequence (SS, blue box).  
893 The majority of the extracellular domain (ECD, light brown box) was removed to generate 3xHA::amx<sup>ΔECD</sup>,  
894 consisting mostly of the TM2 domain (red box) tagged with the N-terminal 3xHA epitope. (B)  
895 Overexpression of 3xHA::Amx<sup>FL</sup> with *pannier(pnr)*-GAL4 has no effect on notum morphology. (C)  
896 Expression of 3xHA::Amx<sup>FL</sup> in the posterior wing using *engrailed (en)*-GAL4 has no effect of the  
897 morphology of wings of adults raised at 29°C. (E) *pnr-GAL4* driven overexpression of truncated Amx  
898 causes an increase in the number of micro- and macrochaete, indicative of loss of Notch mediated lateral  
899 inhibition. (F) *en-GAL4* driven overexpression of 3xHA::Amx<sup>ΔECD</sup> causes notching of the posterior wing  
900 margin. (G-H) Immunostaining of wing imaginal discs expressing full-length or truncated 3xHA::Amx. (G)  
901 3xHA::Amx<sup>FL</sup> expression in the posterior imaginal wing disc using *en-GAL4* has no effect on NRE (Notch  
902 response element)-GFP expression, a synthetic *in vivo* Notch signaling reporter (G', rainbow) and on Cut  
903 (G'', white) expression, a downstream target of Notch activation in this context. The domain expressing  
904 GAL4 is marked by RFP (red). (H) Expression of 3xHA::Amx<sup>ΔECD</sup> decreases NRE-GFP (rainbow)  
905 expression (H') and reduces Cut expression (H'').

906 **Figure 5.**

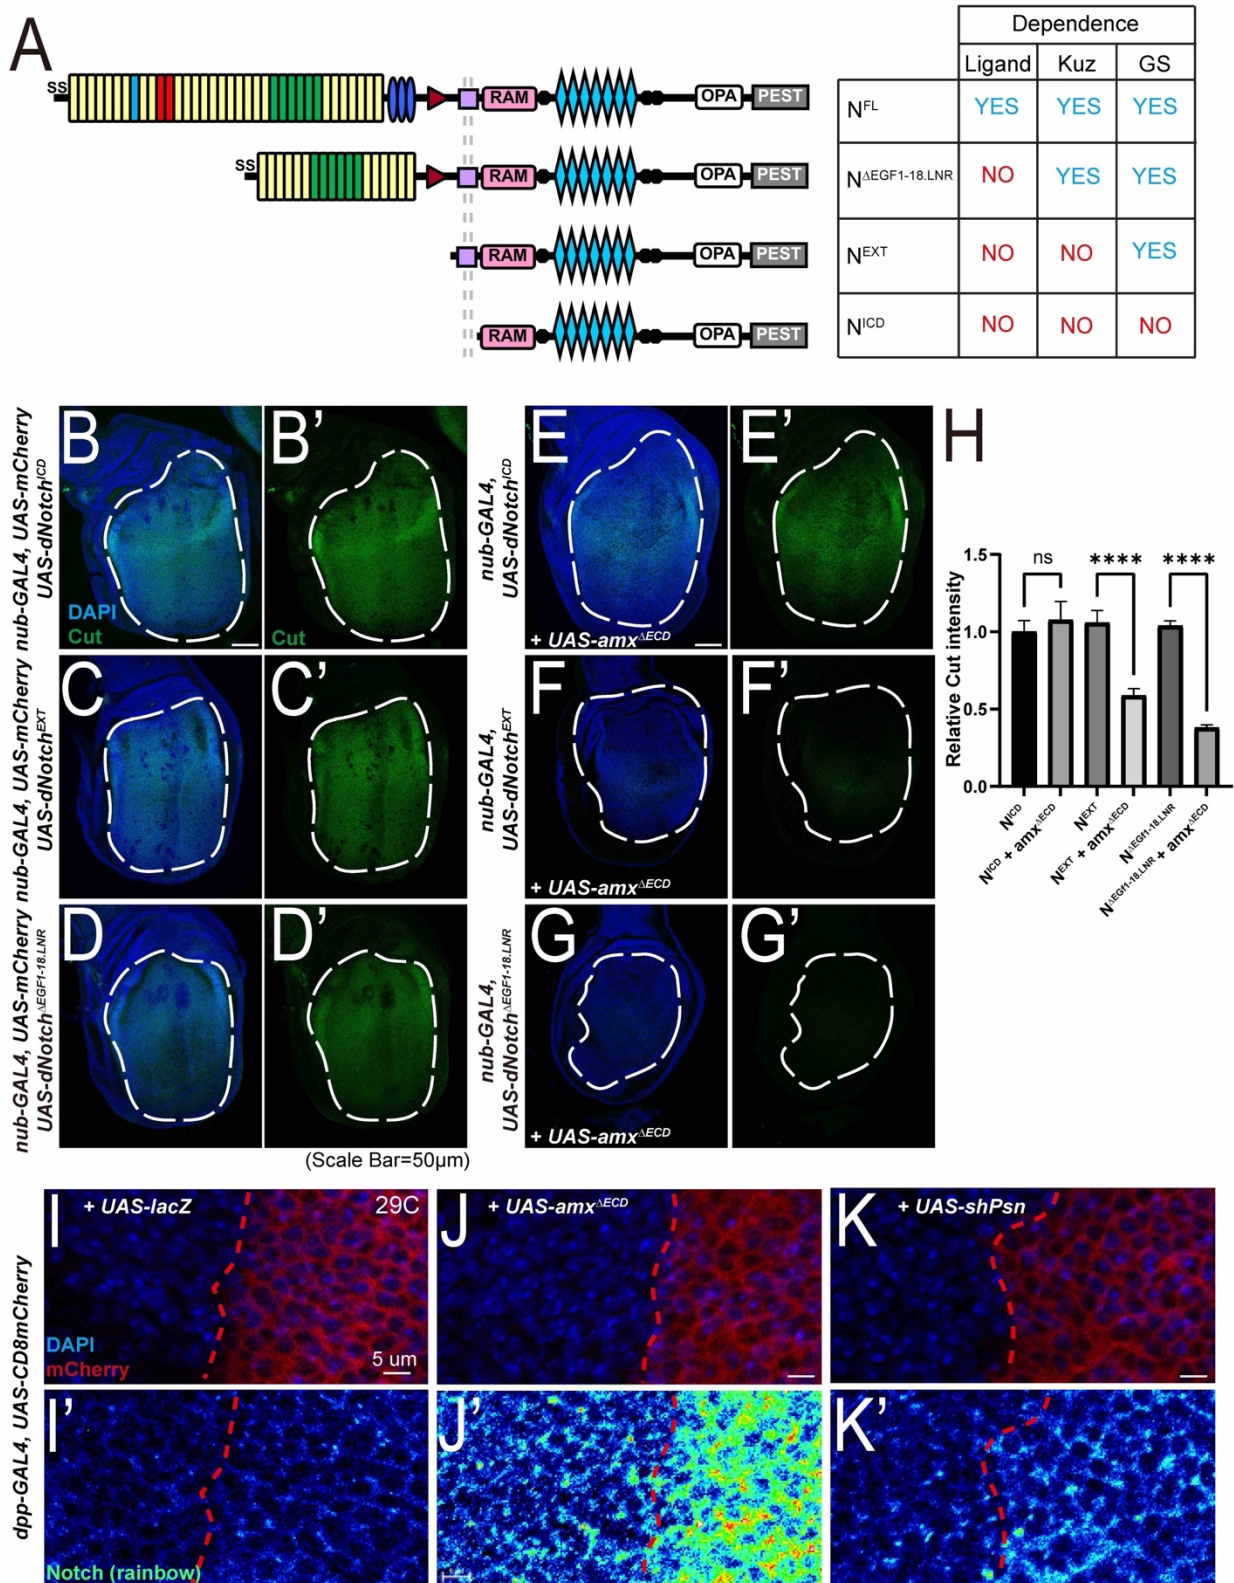

907



908 **Figure 5. Genetic epistasis experiments place truncated Amx at the  $\gamma$ -secretase cleavage step of Notch**  
909 **activation.** (A) Schematics and characteristics of Notch proteins made from each *UAS-Notch* transgenes  
910 that were generated for this study. Full-length Notch ( $N^{FL}$ ) requires ligand binding and processing by  
911 Kuzbanian (Kuz) and  $\gamma$ -secretase (GS) for activation. Notch with EGF repeats and LNR domains removed  
912 ( $N^{\Delta EGF1-18.LNR}$ ) is not dependent on ligands but are dependent on both Kuz and GS for activation. Notch with  
913 an extracellular truncation ( $N^{EXT}$ ) is dependent only on GS for activation. The Notch intracellular domain  
914 ( $N^{ICD}$ ) is constitutively active. (B-D) Expression of Notch constructs leads to increase in Cut (green)  
915 expression, quantified in (H). (E) Co-overexpression of 3xHA::Amx $^{\Delta ECD}$  has no effect of  $N^{ICD}$  mediated  
916 increases in Cut expression (E', H). (F-G') 3xHA::Amx $^{\Delta ECD}$  expression suppresses the effects of  $N^{\Delta EGF1-}$   
917  $^{18.LNR}$  and  $N^{EXT}$  on Cut expression (F', G', H). t-test. \*= p<0.05. \*\*\*\*= p<0.0001. Error bars show SEM.  
918 Scale bar = 50  $\mu$ m. (I-K) Overexpression of 3xHA::Amx $^{\Delta ECD}$  causes an increase of Notch protein levels (J')  
919 compared to overexpression of a neutral protein, LacZ ( $\beta$ -galactosidase) (I'). Knockdown of *psn* mediated  
920 by shRNA also results in mild increase Notch levels (K'), mimicking the effect of 3xHA::Amx $^{\Delta ECD}$ .

921 **Figure 6.**

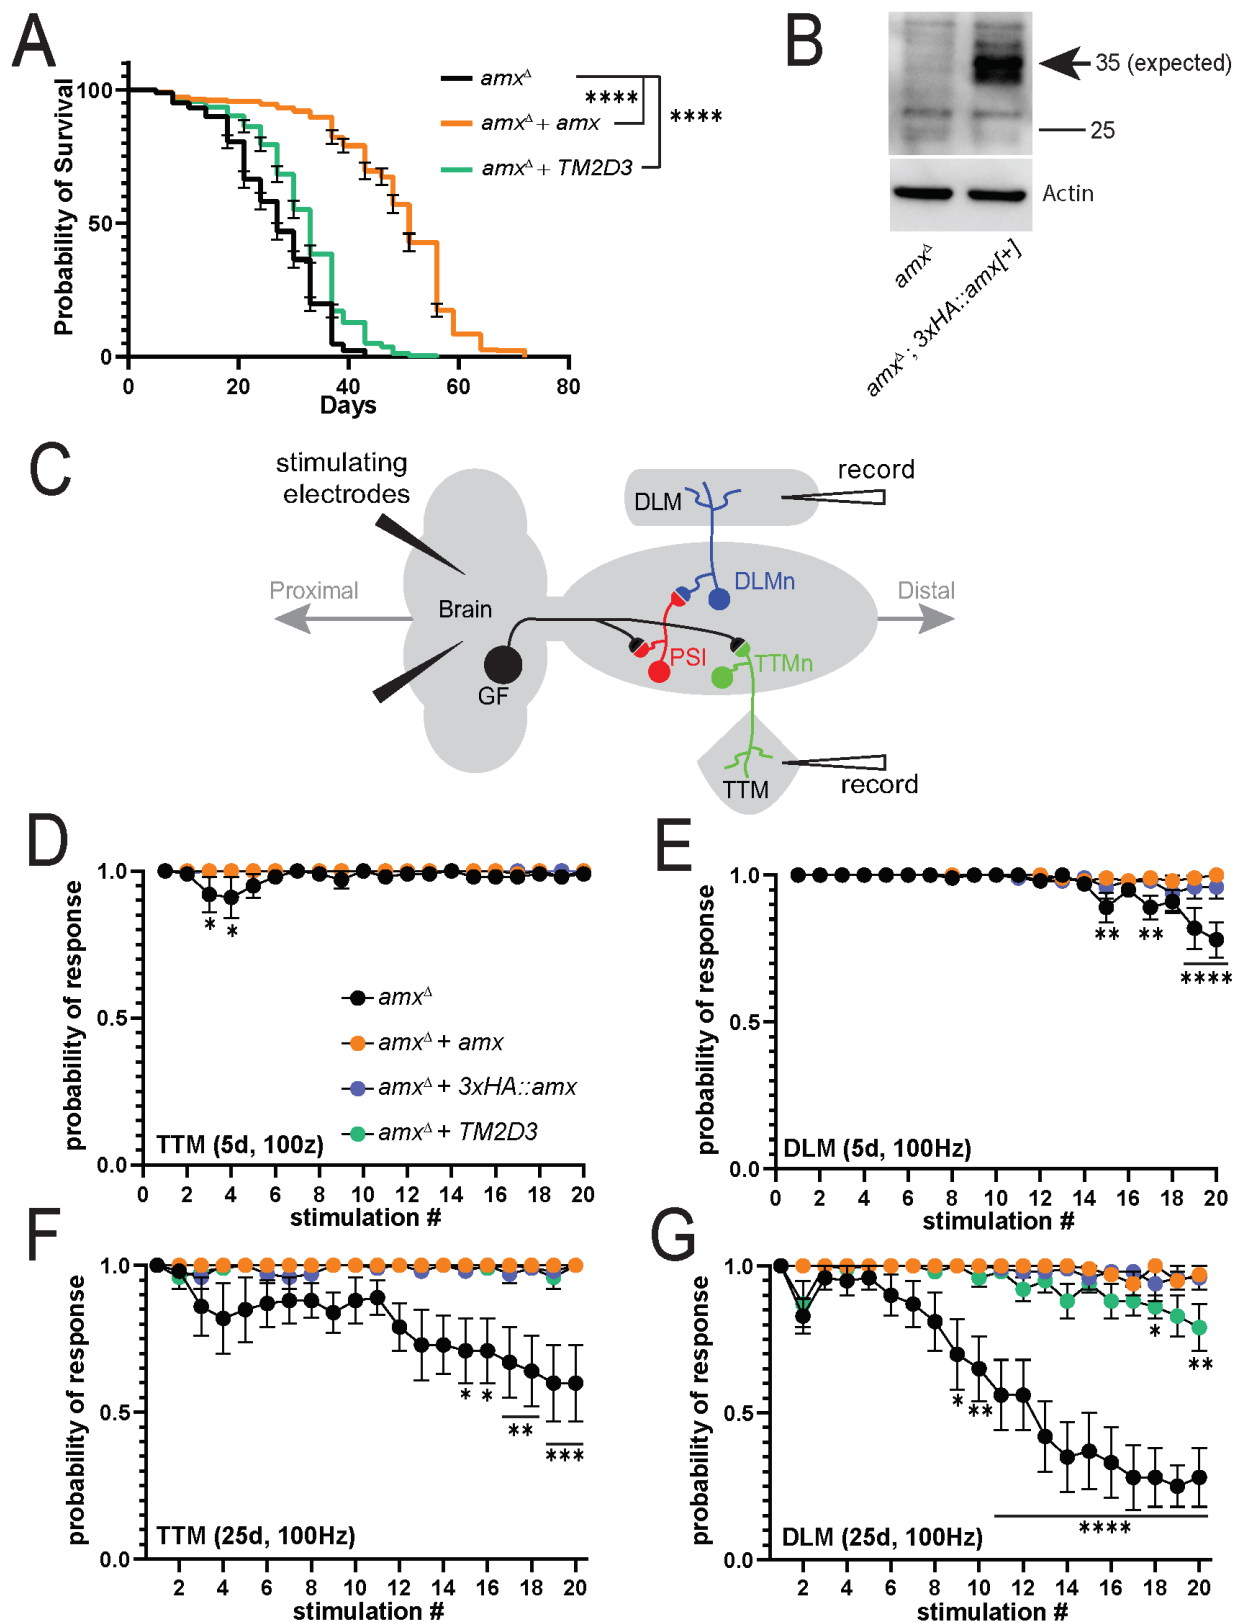

922

923 **Figure 6. Loss of *amx* causes shortening of lifespan and age-dependent neurophysiological defects.**

924 (A) Lifespan assay shows *amx*<sup>Δ</sup> animals (black, n=247) have reduced lifespan compared to *amx*<sup>Δ</sup> + *amx*  
925 controls (orange, n=224). *amx*<sup>Δ</sup> + human *TM2D3* flies (green, n=234) have significantly longer lifespan  
926 than *amx*<sup>Δ</sup> animals, but shorter than control. Animals were reared at 25°C; Log-rank test (Mantel-Cox),  
927 \*\*\*\*= p<0.0001. (B) Western blot of *amx*<sup>Δ</sup>; *3xHA::amx* brains shows that 3xHA::Amx (predicted 35 kDa  
928 size) is expressed in the adult nervous system (arrow). Protein isolate from five brains was loaded per lane  
929 and Actin was probed as a loading control. (C) Schematization of the giant fiber electrophysiological  
930 recordings. Stimulating electrodes are inserted into the brain and recording electrodes record responses  
931 from the TTM and DLM muscles. (D-E) TTM muscles of 5d old *amx*<sup>Δ</sup> mutants (black) have a response  
932 similar to *amx*<sup>Δ</sup> + *amx* controls (orange) while DLM muscles have small but significant decrease in response  
933 probability. *3xHA::amx* (blue) flies also perform as well as controls. (F-G) TTM and DLM response in 25d  
934 old *amx*<sup>Δ</sup> mutants is significantly reduced. DLM response of 25d old *amx*<sup>Δ</sup> + human *TM2D3* (green) flies  
935 is reduced compared to controls (I). Multiple unpaired t-tests with Holm-Šidák correction for multiple  
936 comparisons. \*= p<0.05. \*\* = p≤0.01. \*\*\*= p<0.001, \*\*\*\*= p<0.0001. Error bars show SEM. Additional  
937 data can be found in **Supplemental Figures 8-10**.

938 Supplemental Figures and Figure Legends (Supplemental Figures 1-10).

939 Supplemental Figure 1.

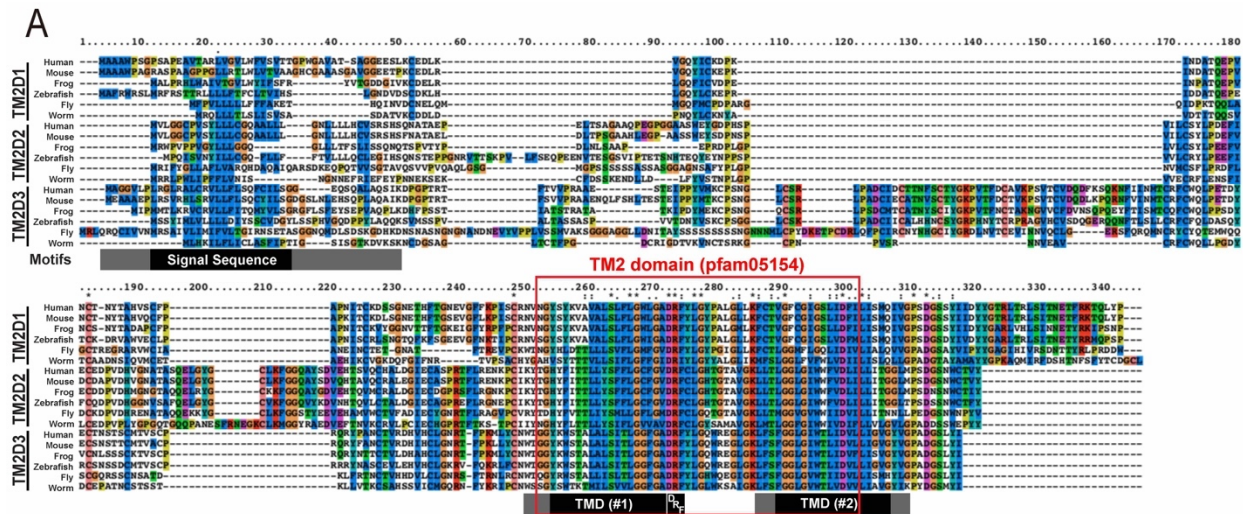

940

941 **Supplemental Figure 1. *TM2D* genes are conserved in metazoan species.** Protein alignment of Human  
942 *TM2D* proteins across multiple species (human, mouse, frog, zebrafish, fly, worm). *TM2* domain (red box,  
943 [pfam05154](#)) is highly conserved among the proteins and across species. C' terminus of the proteins are also  
944 well conserved across species. Black bars denote the regions that are commonly annotated as Signal  
945 Sequence, TMD (Transmembrane domain, #1), DRF or TMD (#2) in all human *TM2D1-3* proteins  
946 (consensus regions) based on Uniprot (<https://www.uniprot.org/>). Gray bars show regions that have been  
947 annotated as Signal Sequence, TMD (#1) or TMD (#2) in one or two human *TM2D1-3* proteins.  
948

949 **Supplemental Figure 2.**

**A**

TM2D transcript:  
(expected size  
550bp each)

Genotype:

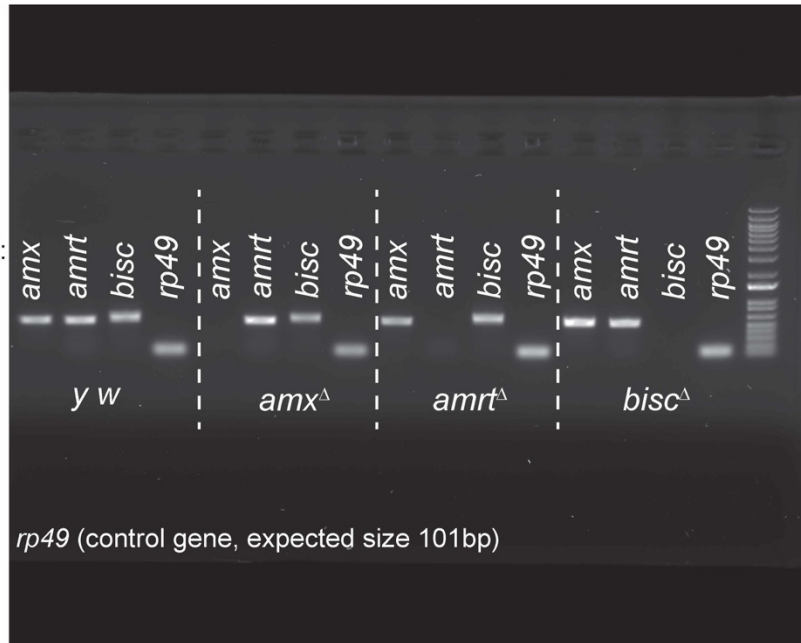

**B**

TM2D transcript:  
(expected size  
550bp each)

Genotype:

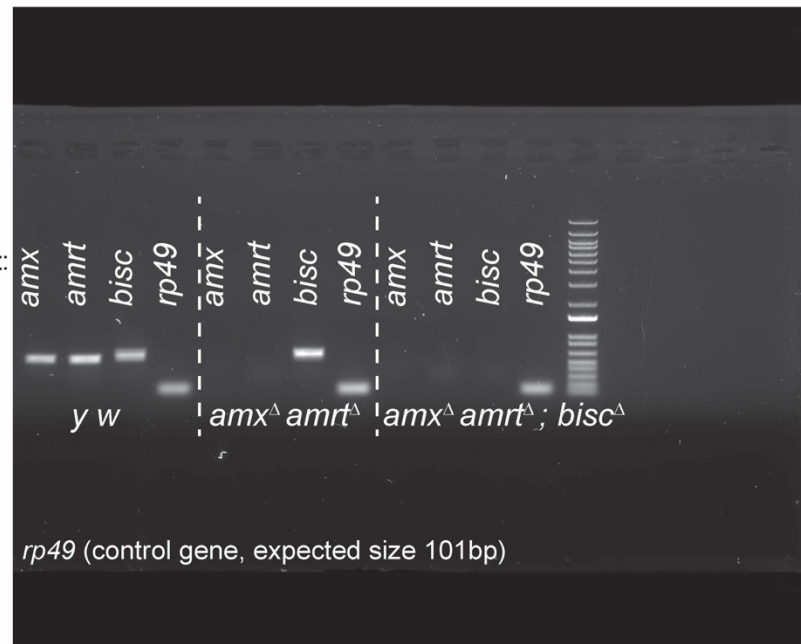

950

951 **Supplemental Figure 2. *TM2D* null fly mutants do not express corresponding mRNAs.** Reverse  
952 transcription followed by PCR (RT-PCR) to verify loss of *TM2D* gene transcripts in mutant fly lines.  
953 mRNA was isolated from animals homozygous for their respective alleles. (A) Single mutant lines lack  
954 their appropriate gene transcript while other *TM2D* transcripts are unaffected. (B) *amx amrt* double mutants  
955 express *bisc*. *TM2D* triple mutants lack all transcripts. *rp49* is a house-keeping gene used as a control for  
956 the reverse transcription reaction.

957 **Supplemental Figure 3.**

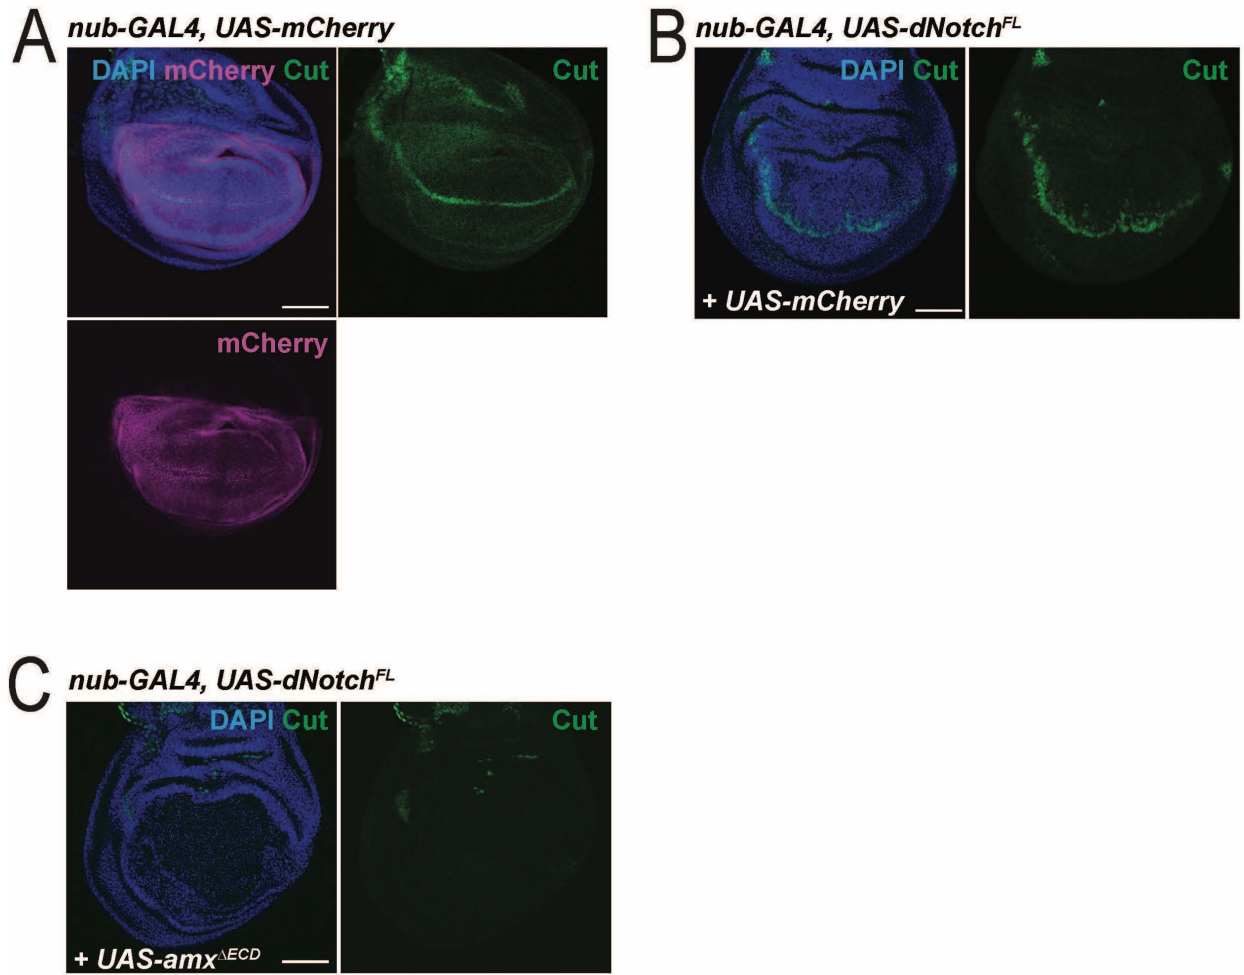

958



959 **Supplemental Figure 3. Epistasis experiments between Amx<sup>ΔECD</sup> and full-length Notch in the wing**  
960 **imaginal disc.** (A) A developing wing disc exhibiting normal expression of Notch target Cut (green) within  
961 the wing pouch labeled by *UAS-CD8::mCherry* driven by *nub-GAL4* (magenta). (B) Overexpression of  
962 full-length Notch in the developing wing pouch via *nub-GAL4* causes a minor upregulation of Cut  
963 expression close to the wing margin, likely reflecting the availability of ligands within the wing pouch. (C)  
964 Amx<sup>ΔECD</sup> inhibits the increase of Cut expression induced by Notch as well as abolishing the normal  
965 expression levels of Cut, showing it is epistatic to full-length Notch.

966 **Supplemental Figure 4.**

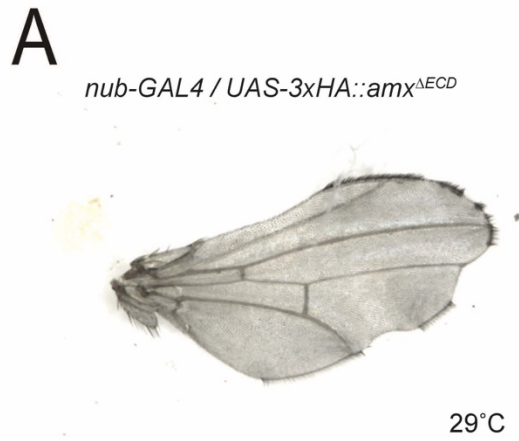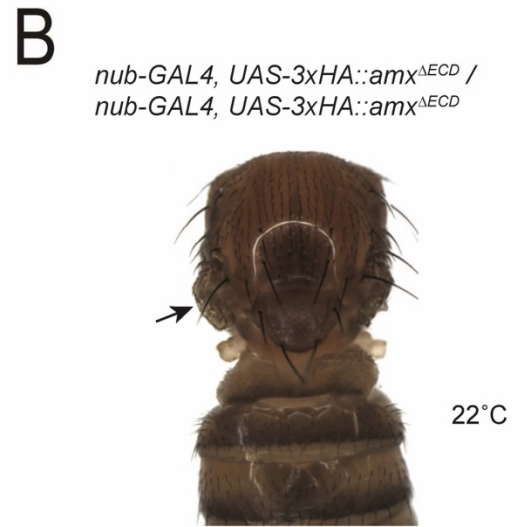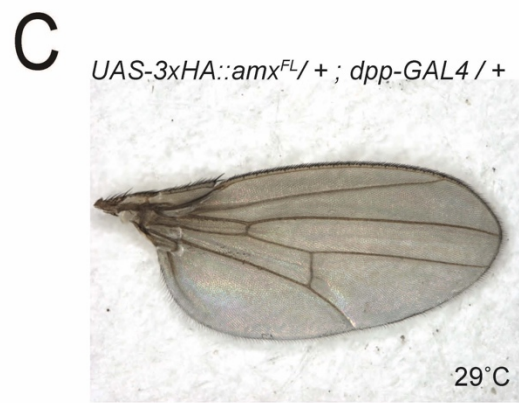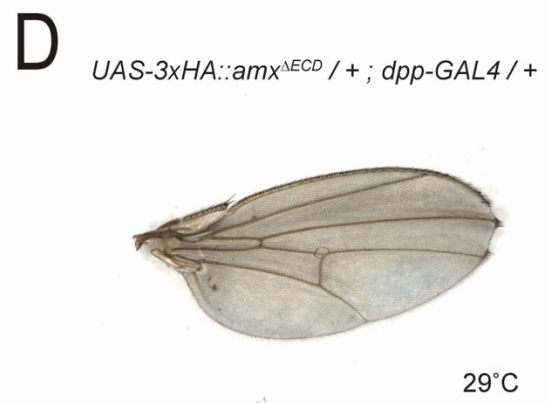

967

968 **Supplemental Figure 4. Truncated Amx causes wing notching or wing loss when expressed with**  
969 **multiple wing-expressed GAL4 drivers. (A) Amx<sup>ΔECD</sup> expressed in the developing wing pouch with nub-**  
970 **GAL4 causes notching along the wing margin. (B) Homozygous nub-GAL4, UAS-amx<sup>ΔECD</sup> recombinant**  
971 **animals show near complete loss of wing (arrow). (C) dpp-GAL4 (expressed between the third and fourth**  
972 **wing veins) driven expression of Amx<sup>FL</sup> has no effect on wing morphology. (D) dpp-GAL4 driven**  
973 **expression of Amx<sup>ΔECD</sup> causes notching at the wing tip.**

974 **Supplemental Figure 5.**

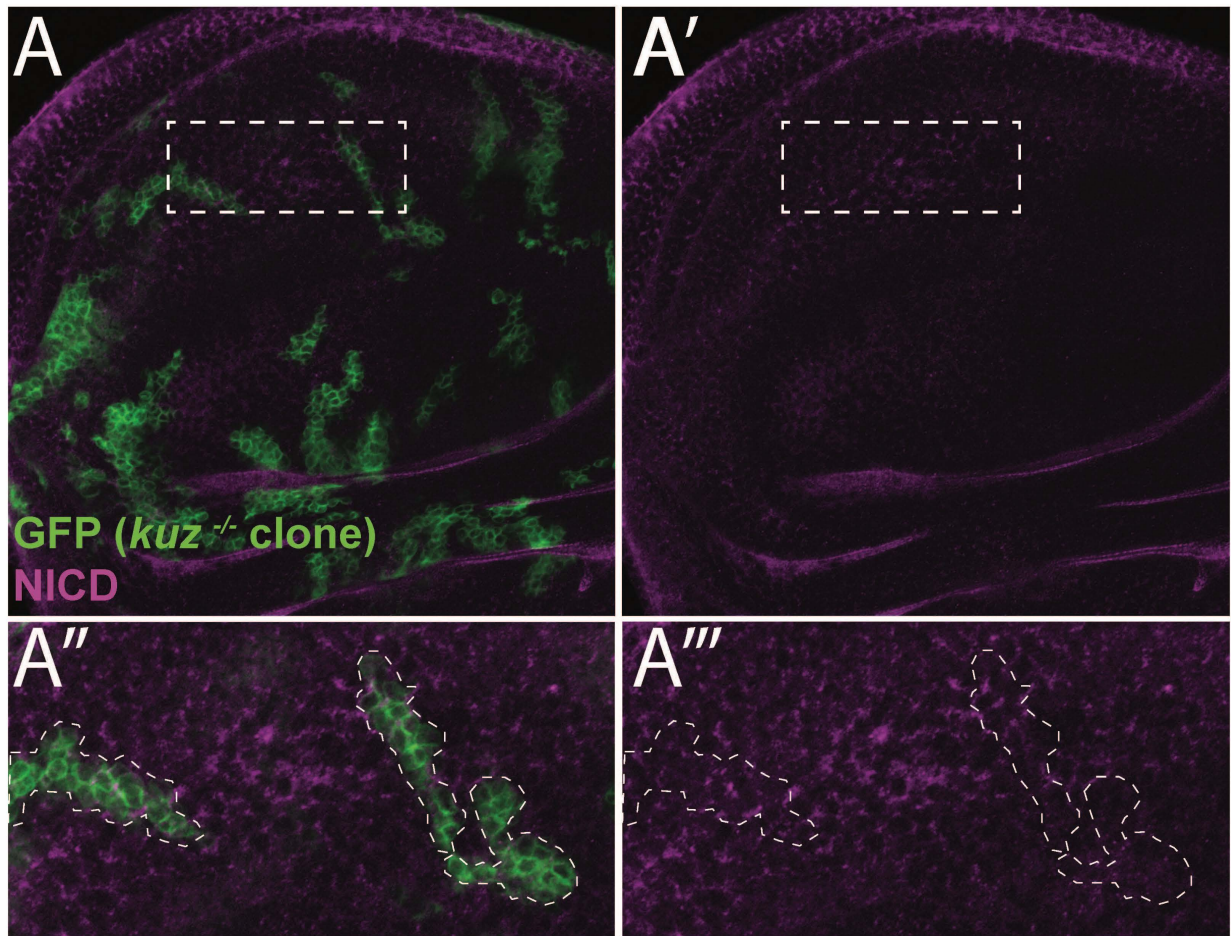

975

976 **Supplemental Figure 5. *kuz* (ADAM10) null mutant clones do not show Notch accumulation.** (A) *kuz*<sup>-</sup>  
977 <sup>-</sup> clones (positively marked by GFP, green) were generated by MARCM using a heat shock induced Fippase  
978 (*hs-FLP*). The expression level and gross subcellular localization of Notch (magenta) is not altered in *kuz*<sup>-</sup>  
979 <sup>-</sup> clones compared to control tissue (non-GFP cells). A'' and A''' show the boxed region in A and A'.

980 Supplemental Figure 6.

A

| Symbol                                                                                      |            | Name       |              | Annotation Symbol |        | FlyBase ID  |  |
|---------------------------------------------------------------------------------------------|------------|------------|--------------|-------------------|--------|-------------|--|
| amx                                                                                         |            | almondex   |              | CG12127           |        | FBgn0000077 |  |
| Gene FPKMs and Enrichments <span style="float: right;">SDs Whole Body Male v. Female</span> |            |            |              |                   |        |             |  |
| Tissue                                                                                      | Adult Male |            | Adult Female |                   | Larval |             |  |
|                                                                                             | FPKM       | Enrichment | FPKM         | Enrichment        | FPKM   | Enrichment  |  |
| Head                                                                                        | 4.9        | 1.5        | 6.3          | 1.0               |        |             |  |
| Eye                                                                                         | 5.7        | 1.8        | 6.8          | 1.1               |        |             |  |
| Brain / CNS                                                                                 | 5.6        | 1.7        | 6.4          | 1.0               | 2.9    | 0.8         |  |
| Thoracoabdominal ganglion                                                                   | 6.0        | 1.9        | 5.7          | 0.9               |        |             |  |
| Crop                                                                                        | 4.8        | 1.5        | 5.7          | 0.9               |        |             |  |
| Midgut                                                                                      | 5.9        | 1.8        | 4.2          | 0.7               | 6.6    | 1.8         |  |
| Hindgut                                                                                     | 4.1        | 1.3        | 4.6          | 0.7               | 3.7    | 1.0         |  |
| Malpighian Tubules                                                                          | 5.7        | 1.8        | 5.8          | 0.9               | 4.8    | 1.3         |  |
| Fat body                                                                                    | 5.0        | 1.5        | 5.4          | 0.9               | 4.4    | 1.2         |  |
| Salivary gland                                                                              | 6.2        | 1.9        | 6.0          | 1.0               | 4.6    | 1.2         |  |
| Heart                                                                                       | pending    | —          | pending      | —                 |        |             |  |
| Trachea                                                                                     |            |            |              |                   | 4.1    | 1.1         |  |
| Ovary                                                                                       |            |            | 7.2          | 1.2               |        |             |  |
| Virgin Spermatheca                                                                          |            |            | 4.3          | 0.7               |        |             |  |
| Mated Spermatheca                                                                           |            |            | 4.8          | 0.8               |        |             |  |
| Testis                                                                                      | 1.3        | 0.4        |              |                   |        |             |  |
| Accessory glands                                                                            | 7.7        | 2.4        |              |                   |        |             |  |
| Carcass                                                                                     | 6.1        | 1.9        | 6.2          | 1.0               | 3.1    | 0.8         |  |
| Rectal pad                                                                                  | 5.8        | 1.8        | 4.2          | 0.7               |        |             |  |

B

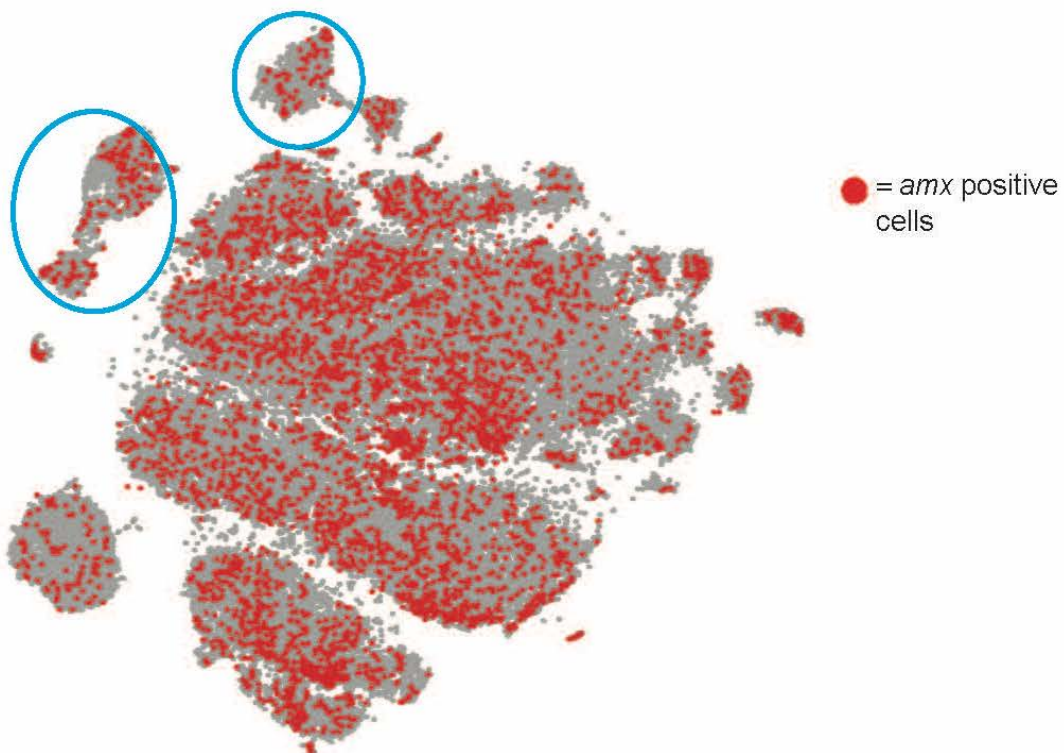

982 **Supplemental Figure 6. *amx* mRNA is expressed in nervous system of *Drosophila* according to**  
983 **transcriptomic databases.** (A) Summary table for *amx* transcript expression provided by FlyAtlas  
984 (<http://flyatlas.gla.ac.uk/FlyAtlas2/index.html?search=gene&gene=CG12127&idtype=cgnum#mobileTar>  
985 [getG](#)). *amx* transcript is found in the Brain/CNS of adult flies, as well as other tissues. (B) Single-cell  
986 transcript data shows *amx* expressed in many but not all cells in the adult fly brain based on (Davie et al.,  
987 2018). Clusters of cells positive for *repo* (glial marker) expression are circled in blue; the remaining cells  
988 are largely *elav* (neuronal marker) positive (<https://scope.aertslab.org/>). Red dots are cells positive for *amx*  
989 expression.



990 **Supplemental Figure 7.**

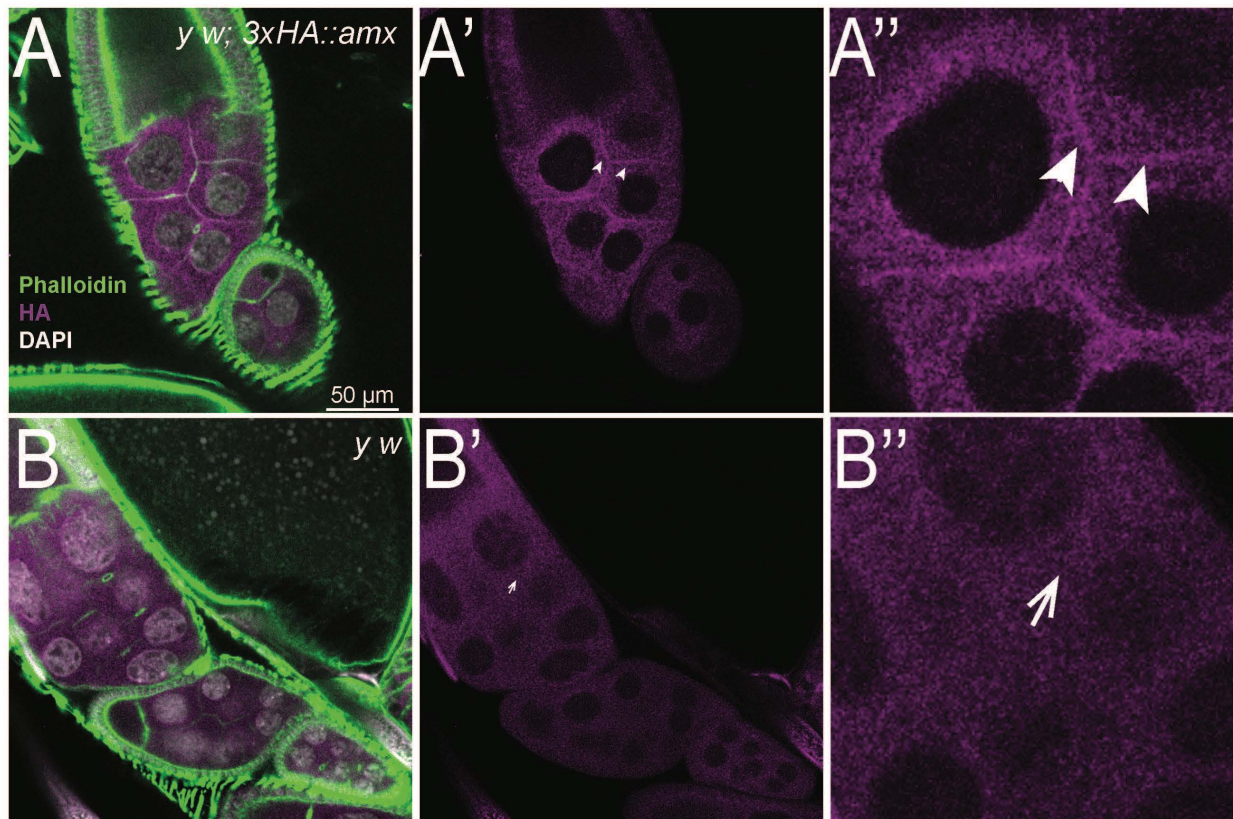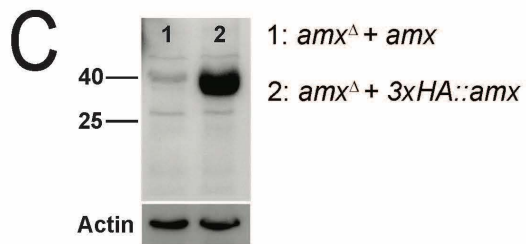

991



992 **Supplemental Figure 7. 3xHA::Amx is expressed in the *Drosophila* ovary and localizes to the cell**  
993 **membrane as well as intracellular puncta.** (A-B) 3xHA::Amx (magenta) localizes to the plasma  
994 membrane (marked by Phalloidin, green) separating nurse cells (arrow heads). The signal is relatively low  
995 but clearly above background levels of *y w* control (A'' vs. B''). The same membranous localization of HA  
996 staining is not seen in negative control (arrows). (C) Western blot on ovaries showing positive expression  
997 of 3xHA::Amx (lane 2, expected size 35 kDa) in *amx<sup>d</sup>* flies compared to untagged Amx control in the same  
998 genetic background (lane 1); two ovary pairs were loaded per lane.

999 Supplemental Figure 8.

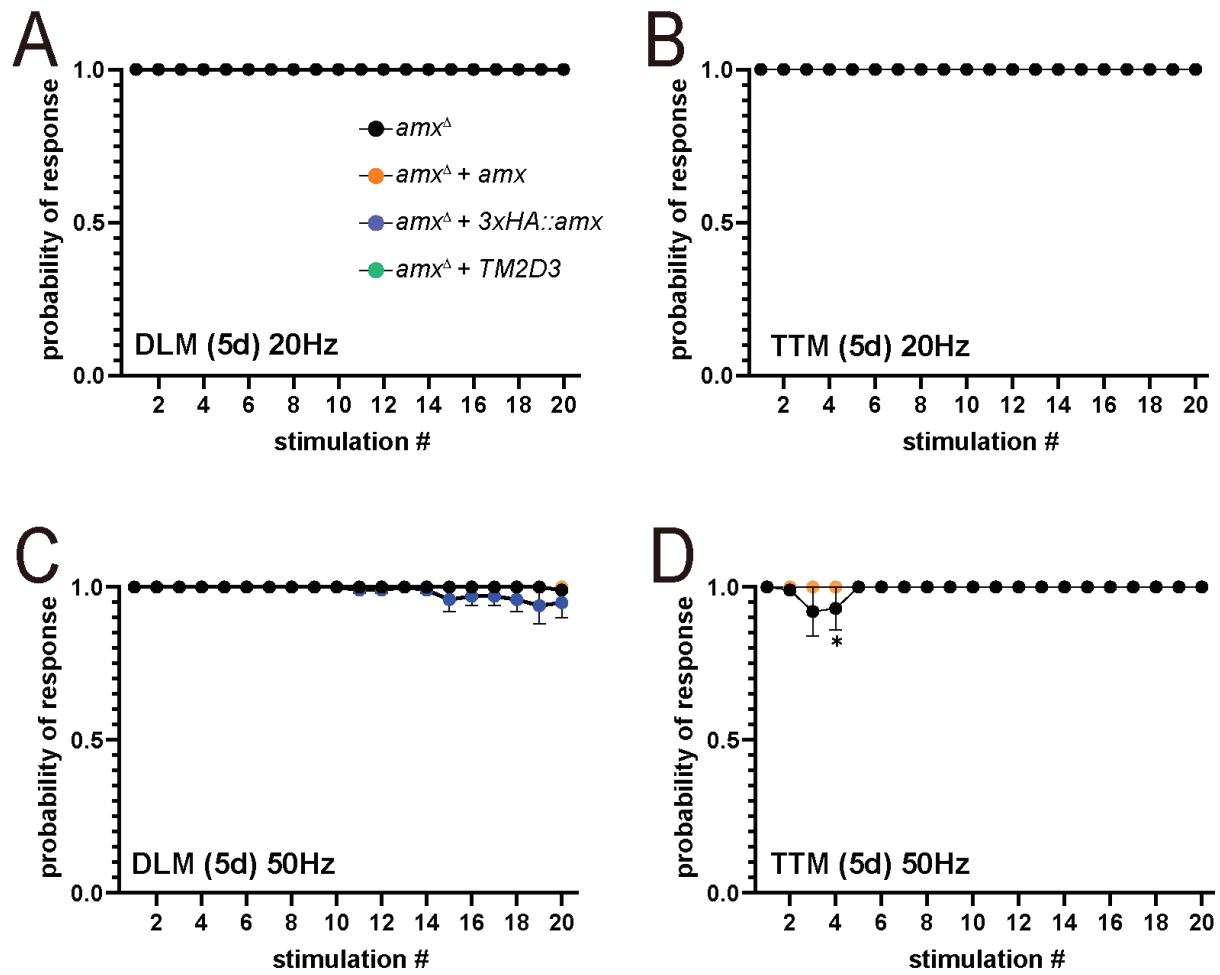

1000

1001 **Supplemental Figure 8. Giant fiber recordings from 5 day post eclosion flies stimulated at 20 and 50**  
1002 **Hz.** (A,C). DLM muscles of 5 day old *amx*<sup>Δ</sup> mutants (black) have a response similar to *amx*<sup>Δ</sup> + *amx* controls  
1003 (orange) at stimulation frequencies of 20 and 50 Hz. (B,D) TTM muscles show a small but significant  
1004 decrease in response probability at 50 Hz but not 20 Hz. *amx*<sup>Δ</sup> + *3xHA::amx* (blue) flies also perform as  
1005 well as controls (A-D). Multiple unpaired t-tests with Holm-Šídák correction for multiple comparisons. \*=  
1006 p<0.05. Error bars show SEM.

1007 Supplemental Figure 9.

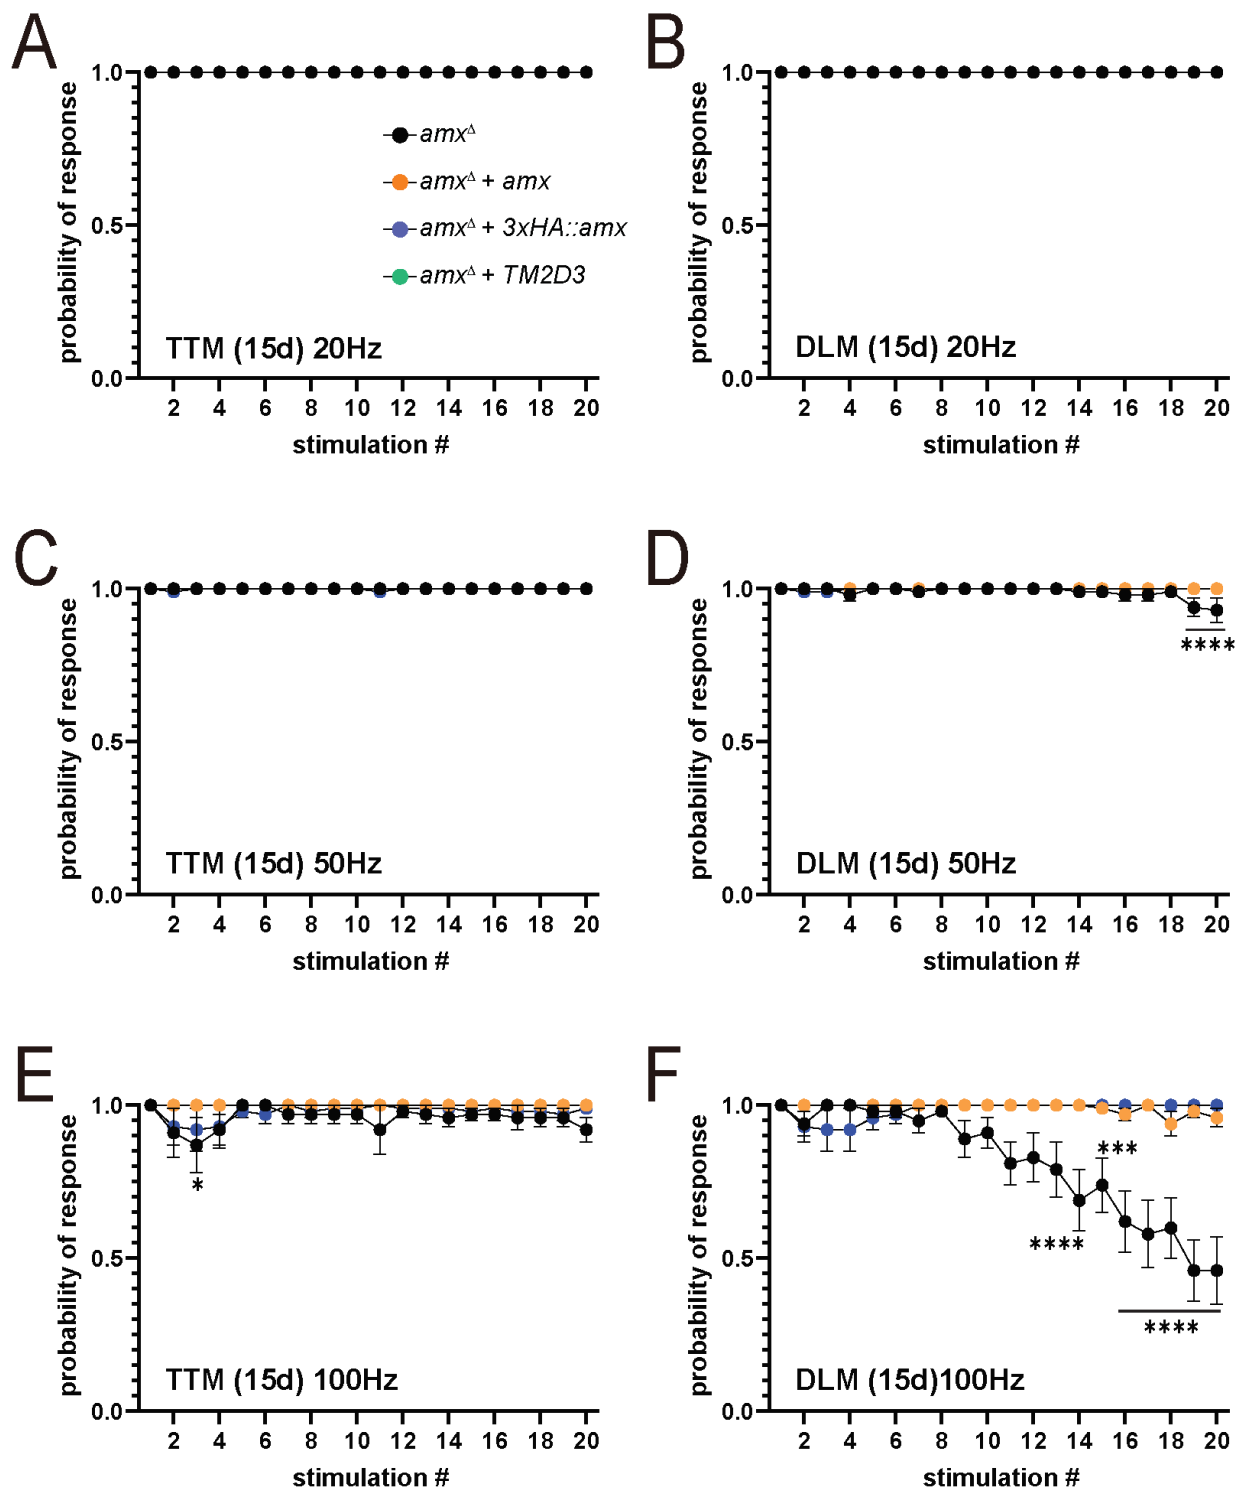

1008

1009 **Supplemental Figure 9. Giant fiber recordings from 15 day post eclosion flies stimulated at 20, 50**  
1010 **and 100 Hz.** (A,C,E) TTM failure rate at 20 and 50 Hz. Responses are similar between *amx<sup>Δ</sup>* mutants (black)  
1011 and *amx<sup>Δ</sup> + amx* controls (orange) (A, C), with slight but significant failures were observed at 100 Hz (E).  
1012 (B,D,F) DLM failure rate at 20 and 50 Hz. *amx<sup>Δ</sup>* mutants have a response similar to *amx<sup>Δ</sup> + amx* controls at  
1013 20 Hz (B) but begin to show significant failure to respond at 50 and 100 Hz (D,F). Multiple unpaired t-tests  
1014 with Holm-Šidák correction for multiple comparisons. \*\*\*=  $p < 0.001$ , \*\*\*\*=  $p < 0.0001$ . Error bars show  
1015 SEM.

1016 Supplemental Figure 10.

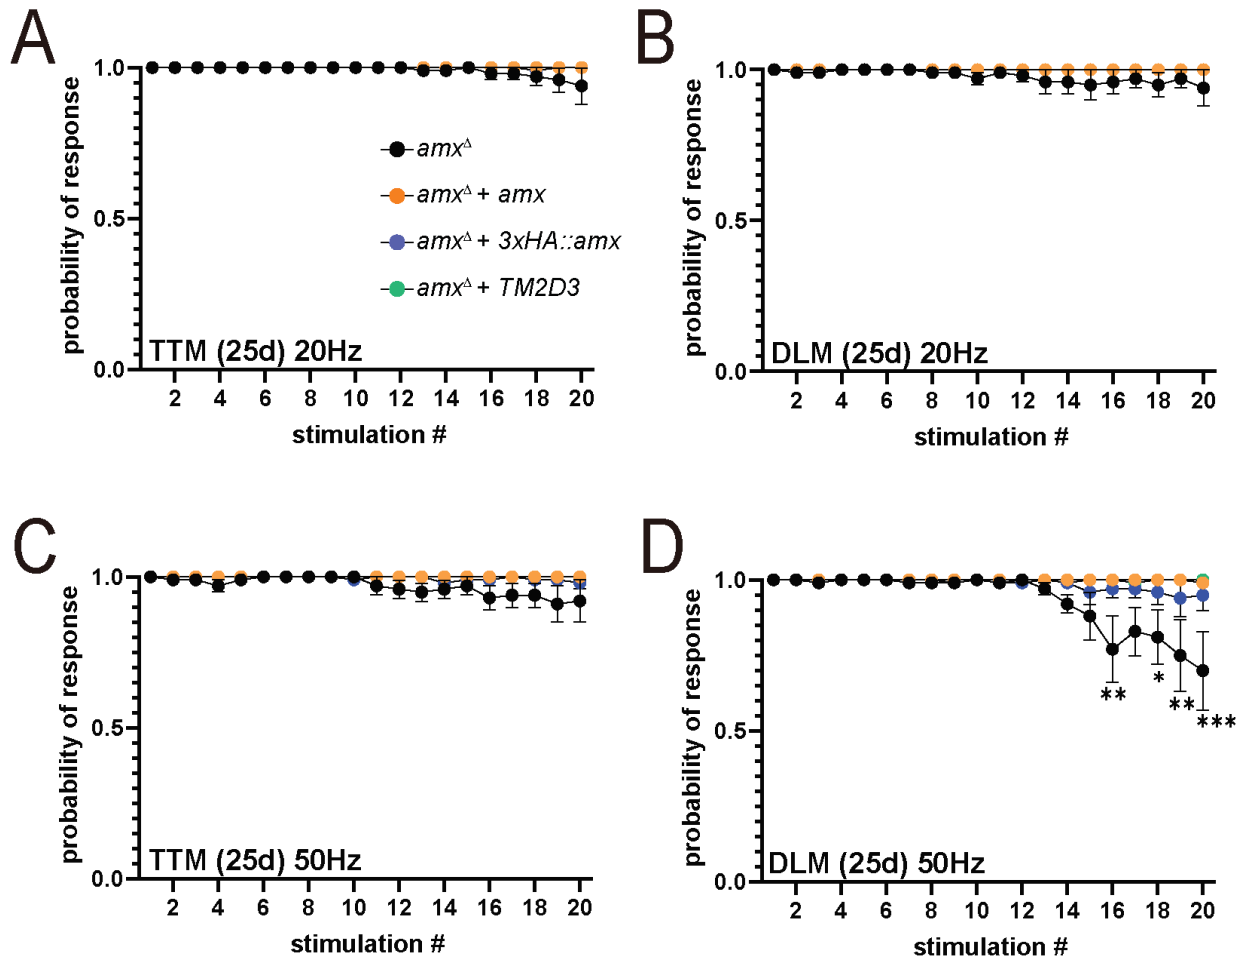

1017

1018

1019 **Supplemental Figure 10. Giant fiber recordings from 25 day post eclosion flies stimulated at 20 and**  
1020 **50 Hz.** (A,C) TTM response at 20 and 50 Hz of 25 day old *amx*<sup>Δ</sup> mutants is similar to controls and  
1021 animals carrying a human *TM2D3* rescue construct. (B,D) At 25d old, *amx*<sup>Δ</sup> mutants perform similarly to  
1022 controls at 20 Hz (B) but show a significant increase in response failure at 50 Hz (D). Human *TM2D3*  
1023 rescued flies again perform similarly to controls. Multiple unpaired t-tests with Holm-Šídák correction for  
1024 multiple comparisons. \*= p<0.05. \*\*= p<0.01, \*\*\*= p<0.001. Error bars show SEM.

1025 **Key Resources Table**

1026 PMID: PubMed ID (<https://pubmed.ncbi.nlm.nih.gov>), BDSC: Bloomington Drosophila Stock Center ID

1027 (<https://bdsc.indiana.edu>), DSHB: Developmental Studies Hybridoma Bank ID

1028 (<https://dshb.biology.uiowa.edu>)

| Reagent type (species) or resource                         | Designation                                                   | Source or reference                       | Identifiers (FlyBase)                                                                     | Additional information                                                                                                                    |
|------------------------------------------------------------|---------------------------------------------------------------|-------------------------------------------|-------------------------------------------------------------------------------------------|-------------------------------------------------------------------------------------------------------------------------------------------|
| Genetic reagent ( <i>D. melanogaster</i> )                 | <i>amx<sup>A</sup></i><br>(a.k.a. <i>amx<sup>ACDS</sup></i> ) | PMID:<br>30091705                         | FBal0341603                                                                               | knockout of <i>amx</i> using the <i>y<sup>wing2+</sup></i> marker                                                                         |
|                                                            | <i>amrt<sup>A</sup></i>                                       | This study                                |                                                                                           | knockout of <i>amrt</i> using the <i>y<sup>body+</sup></i> marker                                                                         |
|                                                            | <i>bisc<sup>A</sup></i>                                       | This study                                |                                                                                           | knockout of <i>bisc</i> using the <i>y<sup>body+</sup></i> marker                                                                         |
|                                                            | <i>pattB-amx</i><br>(a.k.a. <i>amx<sup>+3.325</sup></i> )     | PMID:<br>27764101                         | FBal0338083                                                                               | Untagged genomic rescue transgene for <i>amx</i>                                                                                          |
|                                                            | <i>pattB-3xHA::amx</i>                                        | This study                                |                                                                                           | 3xHA-tagged genomic rescue transgene for <i>amx</i>                                                                                       |
|                                                            | <i>pattB-TM2D3</i><br>(a.k.a. <i>TM2D3<sup>amx.1</sup></i> )  | PMID:<br>27764101                         | FBal0338084                                                                               | Humanized genomic rescue transgene for <i>amx</i>                                                                                         |
|                                                            | <i>pattB-amrt</i>                                             | This study                                |                                                                                           | Untagged genomic rescue transgene for <i>amrt</i>                                                                                         |
|                                                            | <i>bisc::GFP</i>                                              | This study                                |                                                                                           | GFP (and other epitope)-tagged genomic rescue transgene for <i>bisc</i> . Derived from fosmid: FlyFos021003 (PMID: 26896675)              |
|                                                            | <i>y, w, iso#6(X); attP2{nos-Cas9}</i>                        | PMID:<br>30091705                         |                                                                                           | CRISPR stock used to generate <i>amx<sup>A</sup></i> and <i>amrt<sup>A</sup></i> . Derived from RRID:BDSC_78782 (X-chromosome isogenized) |
|                                                            | <i>y, w; iso#2(2); attP2{nos-Cas9}</i>                        | PMID:<br>30091705                         |                                                                                           | CRISPR stock used to generate <i>bisc<sup>A</sup></i> . Derived from RRID:BDSC_78782 (2 <sup>nd</sup> chromosome isogenized)              |
|                                                            | <i>y, M{vas-int.Dm}ZH-2A, w; PBac{y[+]-attP-3B}VK00037</i>    | PMID:<br>17138868,<br>RRID:<br>BDSC 24872 | FBti0099694,<br>FBti0076455                                                               | phiC31 stock used to generate transgenes on the 2 <sup>nd</sup> chromosome (a.k.a. VK37).                                                 |
| <i>y, M{vas-int.Dm}ZH-2A, w; PBac{y[+]-attP-3B}VK00033</i> | PMID:<br>17138868,<br>RRID:<br>BDSC_24871                     | FBti0099694,<br>FBti0076453               | phiC31 stock used to generate transgenes on the 3 <sup>rd</sup> chromosome (a.k.a. VK33). |                                                                                                                                           |



|                                                                                                  |                                           |                                             |                                                                                               |
|--------------------------------------------------------------------------------------------------|-------------------------------------------|---------------------------------------------|-----------------------------------------------------------------------------------------------|
| <i>y, w; UAS-3xHA::Amx<sup>FL</sup></i>                                                          | This study                                |                                             | UAS transgene expressing full length 3xHA-tagged Amx, inserted into VK37                      |
| <i>y, w; UAS-3xHA::Amx<sup>ΔECD</sup></i>                                                        | This study                                |                                             | UAS transgene expressing truncated 3xHA-tagged Amx, inserted into VK37                        |
| <i>y, w; UAS-N<sup>FL</sup></i>                                                                  | This study                                |                                             | UAS transgene expressing full length Notch, inserted into VK37                                |
| <i>y, w; UAS-N<sup>ΔEGFI-18.LNR</sup></i>                                                        | This study                                |                                             | UAS transgene expressing Notch that depends on S2 and S3 cleavages, inserted into VK37        |
| <i>y, w; UAS-N<sup>EXT</sup></i>                                                                 | This study                                |                                             | UAS transgene expressing Notch that depends on S3 cleavage, inserted into VK37                |
| <i>y, w; UAS-N<sup>CD</sup></i>                                                                  | This study                                |                                             | UAS transgene expressing intracellular domain of Notch, inserted into VK37                    |
| <i>UAS-CD8::mCherry(2)</i><br>( <i>a.k.a. w;</i><br><i>P{w[+mC]=UAS-mCD8.ChRFP}2</i> )           | RRID:<br>BDSC_27391                       | FBst0027391                                 | UAS transgene expressing membrane tethered mCherry                                            |
| <i>UAS-CD8::mCherry(3)</i><br>( <i>a.k.a. w;</i><br><i>P{w[+mC]=UAS-mCD8.ChRFP}3</i> )           | RRID:<br>BDSC_27392                       | FBst0027392                                 | UAS transgene expressing membrane tethered mCherry                                            |
| <i>UAS-shPsn (a.k.a. UAS-Psn.shRNA.3)</i>                                                        | PMID:<br>28495961                         | FBal0327448                                 | UAS transgene expressing shRNA against <i>Psn</i> . Gift from Drs. Jongkyun Kang and Jie Shen |
| <i>UAS-LacZ</i>                                                                                  | PMID:<br>8223268                          | FBal0042106                                 | UAS transgene expressing LacZ (negative control). Gift from Dr. Hugo Bellen                   |
| <i>w; P{w[+mW.hs]=en2.4-GAL4}e16E,</i><br><i>P{w[+mC]=UAS-myr-mRFP}1, P{w[+m*]=NRE-EGFP.S}5A</i> | PMID:<br>22384384,<br>RRID:<br>BDSC_30729 | FBti0003572,<br>FBti0027895,<br>FBti0130022 | <i>en-GAL4</i> line with <i>UAS-RFP</i> and <i>NRE-GFP</i>                                    |
| <i>w; P{w[nub.PK]=nub-GAL4.K}2</i>                                                               | RRID:BDSC_<br>86108                       | FBti0150342                                 | <i>nub-GAL4</i> line                                                                          |
| <i>y, w;</i><br><i>P{w[+mW.hs]=GawB}pnr[MD237]/TM3,</i><br><i>P{w[+mC]=UAS-y.C}MC2, Ser[1]</i>   | RRID:BDSC_<br>3039                        | FBti0004011                                 | <i>pnr-GAL4</i> line                                                                          |
| <i>hsFLP; tub-Gal80[ts], FRT40A/CyO ; tub-Gal4, UAS-GFP/TM6b Tb</i>                              | PMID:<br>29773559                         |                                             | MARCM line. Gift from Dr. Wu-Min Deng                                                         |

|                    |                                                       |                                     |                                 |                                                                                     |
|--------------------|-------------------------------------------------------|-------------------------------------|---------------------------------|-------------------------------------------------------------------------------------|
|                    | <i>kuz<sup>e29-4</sup></i> , <i>FRT40A/CyO</i>        | This study                          | FBal0051471<br>,<br>FBti0002071 | <i>kuz<sup>e29-4</sup></i> (from RRID: BDSC_5804) was recombined onto <i>FRT40A</i> |
| Primary Antibody   | mouse anti-Notch intracellular domain (clone C17.9C6) | RRID:DSHB_C17.9C6                   |                                 | monoclonal antibody against the intracellular domain of Drosophila Notch            |
|                    | mouse anti-Cut (clone 2B10)                           | RRID: DSHB 2B10                     |                                 | monoclonal antibody against Drosophila Cut                                          |
|                    | rat anti-HA (clone 3F10)                              | Sigma-Aldrich: 11867423001          |                                 | monoclonal antibody against the HA peptide                                          |
| Secondary Antibody | donkey anti-rat IgG-Cy3                               | Jackson ImmunoResearch: 712-165-153 |                                 | secondary antibody for immunostaining                                               |
|                    | donkey anti-mouse IgG-Alexa-647                       | Jackson ImmunoResearch: 715-605-151 |                                 | secondary antibody for immunostaining                                               |
|                    | donkey anti-rat HRP                                   | Jackson ImmunoResearch: 712-035-150 |                                 | secondary antibody for Western blot                                                 |

1029

1030 **References Cited**

- 1031 Adzhubei IA, Schmidt S, Peshkin L, Ramensky VE, Gerasimova A, Bork P, Kondrashov AS, Sunyaev  
1032 SR. 2010. A method and server for predicting damaging missense mutations. *Nat Methods*.  
1033 doi:10.1038/nmeth0410-248
- 1034 Allen MJ, Godenschwege TA. 2010. Electrophysiological recordings from the *Drosophila* giant fiber  
1035 system (GFS). *Cold Spring Harb Protoc* 5:pdb.prot5453. doi:10.1101/pdb.prot5453
- 1036 Artavanis-Tsakonas S, Matsuno K, Fortini ME. 1995. Notch signaling. *Science (80- )* **268**:225–232.  
1037 doi:10.1126/science.7716513
- 1038 Artavanis-Tsakonas S, Muskavitch MAT. 2010. Notch: The past, the present, and the future, *Current*  
1039 *Topics in Developmental Biology*. doi:10.1016/S0070-2153(10)92001-2
- 1040 Ballatore C, Lee VMY, Trojanowski JQ. 2007. Tau-mediated neurodegeneration in Alzheimer’s disease  
1041 and related disorders. *Nat Rev Neurosci*. doi:10.1038/nrn2194
- 1042 Baron M. 2012. Endocytic routes to Notch activation. *Semin Cell Dev Biol*.  
1043 doi:10.1016/j.semcdb.2012.01.008
- 1044 Bellenguez C, Grenier-Boley B, Lambert JC. 2020. Genetics of Alzheimer’s disease: where we are, and  
1045 where we are going. *Curr Opin Neurobiol*. doi:10.1016/j.conb.2019.11.024
- 1046 Bier E, Harrison MM, O’connor-Giles KM, Wildonger J. 2018. Advances in engineering the fly genome  
1047 with the CRISPR-Cas system. *Genetics* **208**:1–18. doi:10.1534/genetics.117.1113
- 1048 Bischof J, Björklund M, Furger E, Schertel C, Taipale J, Basler K. 2012. A versatile platform for creating  
1049 a comprehensive UAS-ORFeome library in *Drosophila*. *Dev* **140**:2434–2442.  
1050 doi:10.1242/dev.088757
- 1051 Bischof J, Maeda RK, Hediger M, Karch F, Basler K. 2007. An optimized transgenesis system for

- 1052 *Drosophila* using germ-line-specific  $\phi$ C31 integrases. *Proc Natl Acad Sci U S A* **104**:3312–3317.
- 1053 doi:10.1073/pnas.0611511104
- 1054 Brand AH, Perrimon N. 1993. Targeted gene expression as a means of altering cell fates and generating  
1055 dominant phenotypes. *Development* **118**.
- 1056 Brown JB, Boley N, Eisman R, May GE, Stoiber MH, Duff MO, Booth BW, Wen J, Park S, Suzuki AM,  
1057 Wan KH, Yu C, Zhang D, Carlson JW, Cherbas L, Eads BD, Miller D, Mockaitis K, Roberts J,  
1058 Davis CA, Frise E, Hammonds AS, Olson S, Shenker S, Sturgill D, Samsonova AA, Weiszmann R,  
1059 Robinson G, Hernandez J, Andrews J, Bickel PJ, Carninci P, Cherbas P, Gingeras TR, Hoskins RA,  
1060 Kaufman TC, Lai EC, Oliver B, Perrimon N, Graveley BR, Celniker SE. 2014. Diversity and  
1061 dynamics of the *Drosophila* transcriptome. *Nature* **512**:393–399. doi:10.1038/nature12962
- 1062 Cacace R, Slegers K, Van Broeckhoven C. 2016. Molecular genetics of early-onset Alzheimer’s disease  
1063 revisited. *Alzheimer’s Dement.* doi:10.1016/j.jalz.2016.01.012
- 1064 Chintapalli VR, Wang J, Dow JAT. 2007. Using FlyAtlas to identify better *Drosophila melanogaster*  
1065 models of human disease. *Nat Genet.* doi:10.1038/ng2049
- 1066 Cochran JN, McKinley EC, Cochran M, Amaral MD, Moyers BA, Lasseigne BN, Gray DE, Lawlor JMJ,  
1067 Prokop JW, Geier EG, Holt JM, Thompson ML, Newberry JS, Yokoyama JS, Worthey EA,  
1068 Geldmacher DS, Love MN, Cooper GM, Myers RM, Roberson ED. 2019. Genome sequencing for  
1069 early-onset or atypical dementia: High diagnostic yield and frequent observation of multiple  
1070 contributory alleles. *Cold Spring Harb Mol Case Stud* **5**. doi:10.1101/mcs.a003491
- 1071 Córdoba S, Estella C. 2020. Role of Notch Signaling in Leg Development in *Drosophila*  
1072 *melanogaster* *Advances in Experimental Medicine and Biology*. Springer. pp. 103–127.  
1073 doi:10.1007/978-3-030-34436-8\_7
- 1074 Das P, Salazar JL, Li-Kroeger D, Yamamoto S, Nakamura M, Sasamura T, Inaki M, Masuda W,

- 1075 Kitagawa M, Yamakawa T, Matsuno K. 2020. Maternal almondex, a neurogenic gene, is required  
1076 for proper subcellular Notch distribution in early *Drosophila* embryogenesis. *Dev Growth Differ*  
1077 **62**:80–93. doi:10.1111/dgd.12639
- 1078 Davie K, Janssens J, Koldere D, De Waegeneer M, Pech U, Kreft L, Aibar S, Makhzami S, Christiaens V,  
1079 Bravo González-Blas C, Poovathingal S, Hulselmans G, Spanier KI, Moerman T, Vanspauwen B,  
1080 Geurs S, Voet T, Lammertyn J, Thienpont B, Liu S, Konstantinides N, Fiers M, Verstreken P, Aerts  
1081 S. 2018. A Single-Cell Transcriptome Atlas of the Aging *Drosophila* Brain. *Cell* **174**:982-998.e20.  
1082 doi:10.1016/j.cell.2018.05.057
- 1083 De Strooper B, Annaert W, Cupers P, Saftig P, Craessaerts K, Mumm JS, Schroeter EH, Schrijvers V,  
1084 Wolfe MS, Ray WJ, Goate A, Kopan R. 1999. A presenilin-1-dependent  $\gamma$ -secretase-like protease  
1085 mediates release of notch intracellular domain. *Nature* **398**:518–522. doi:10.1038/19083
- 1086 Dickinson ME, Flenniken AM, Ji X, Teboul L, Wong MD, White JK, Meehan TF, Weninger WJ,  
1087 Westerberg H, Adissu H, Baker CN, Bower L, Brown JM, Brianna Caddle L, Chiani F, Clary D,  
1088 Cleak J, Daly MJ, Denegre JM, Doe B, Dolan ME, Edie SM, Fuchs H, Gailus-Durner V, Galli A,  
1089 Gambadoro A, Gallegos J, Guo S, Horner NR, Hsu C wei, Johnson SJ, Kalaga S, Keith LC, Lanoue  
1090 L, Lawson TN, Lek M, Mark M, Marschall S, Mason J, McElwee ML, Newbigging S, Nutter LMJ,  
1091 Peterson KA, Ramirez-Solis R, Rowland DJ, Ryder E, Samocha KE, Seavitt JR, Selloum M, Szoke-  
1092 Kovacs Z, Tamura M, Trainor AG, Tudose I, Wakana S, Warren J, Wendling O, West DB, Wong L,  
1093 Yoshiki A, MacArthur DG, Tocchini-Valentini GP, Gao X, Flicek P, Bradley A, Skarnes WC,  
1094 Justice MJ, Parkinson HE, Moore M, Wells S, Braun RE, Svenson KL, Hrabe de Angelis M, Hraut  
1095 Y, Mohun T, Mallon AM, Mark Henkelman R, Brown SDM, Adams DJ, Kent Lloyd KC, McKerlie  
1096 C, Beaudet AL, Bucan M, Murray SA, McKay M, Urban B, Lund C, Froeter E, LaCasse T,  
1097 Mehalow A, Gordon E, Donahue LR, Taft R, Kutney P, Dion S, Goodwin L, Kales S, Urban R,  
1098 Palmer K, Pertuy F, Bitz D, Weber B, Goetz-Reiner P, Jacobs H, Le Marchand E, El Amri A, El  
1099 Fertak L, Ennah H, Ali-Hadji D, Ayadi A, Wattenhofer-Donze M, Jacquot S, André P, Birling MC,

- 1100 Pavlovic G, Sorg T, Morse I, Benso F, Stewart ME, Copley C, Harrison J, Joynson S, Guo R, Qu D,  
1101 Spring S, Yu L, Ellegood J, Morikawa L, Shang X, Feugas P, Creighton A, Penton PC, Danisment  
1102 O, Griggs N, Tudor CL, Green AL, Icoresi Mazzeo C, Siragher E, Lillistone C, Tuck E, Gleeson D,  
1103 Sethi D, Bayzatinova T, Burvill J, Habib B, Weavers L, Maswood R, Miklejewska E, Woods M,  
1104 Grau E, Newman S, Sinclair C, Brown E, Ayabe S, Iwama M, Murakami A. 2016. High-throughput  
1105 discovery of novel developmental phenotypes. *Nature* **537**:508–514. doi:10.1038/nature19356
- 1106 Doherty D, Feger G, Younger-Shepherd S, Jan LY, Jan YN. 1996. Delta is a ventral to dorsal signal  
1107 complementary to Serrate, another notch ligand, in *Drosophila* wing formation. *Genes Dev* **10**:421–  
1108 434. doi:10.1101/gad.10.4.421
- 1109 Duojia P, Rubin GM. 1997. Kuzbanian controls proteolytic processing of Notch and mediates lateral  
1110 inhibition during *Drosophila* and vertebrate neurogenesis. *Cell* **90**:271–280. doi:10.1016/S0092-  
1111 8674(00)80335-9
- 1112 Etchegaray JI, Elguero EJ, Tran JA, Sinatra V, Feany MB, McCall K. 2016. Defective phagocytic corpse  
1113 processing results in neurodegeneration and can be rescued by TORC1 activation. *J Neurosci*  
1114 **36**:3170–3183. doi:10.1523/JNEUROSCI.1912-15.2016
- 1115 Fehon RG, Kooh PJ, Rebay I, Regan CL, Xu T, Muskavitch MAT, Artavanis-Tsakonas S. 1990.  
1116 Molecular interactions between the protein products of the neurogenic loci Notch and Delta, two  
1117 EGF-homologous genes in *Drosophila*. *Cell* **61**:523–534. doi:10.1016/0092-8674(90)90534-L
- 1118 Feng R, Wang H, Wang J, Shrom D, Zeng X, Tsien JZ. 2004. Forebrain degeneration and ventricle  
1119 enlargement caused by double knockout of Alzheimer’s presenilin-1 and presenilin-2. *Proc Natl*  
1120 *Acad Sci U S A* **101**:8162–8167. doi:10.1073/pnas.0402733101
- 1121 Flatt T. 2011. Survival costs of reproduction in *Drosophila*. *Exp Gerontol* **46**:369–375.  
1122 doi:10.1016/j.exger.2010.10.008

- 1123 Fortini ME, Bilder D. 2009. Endocytic regulation of Notch signaling. *Curr Opin Genet Dev*.  
1124 doi:10.1016/j.gde.2009.04.005
- 1125 Fu R, Shen Q, Xu P, Luo JJ, Tang Y. 2014. Phagocytosis of microglia in the central nervous system  
1126 diseases. *Mol Neurobiol* **49**:1422–1434. doi:10.1007/s12035-013-8620-6
- 1127 Glasauer SMK, Neuhauss SCF. 2014. Whole-genome duplication in teleost fishes and its evolutionary  
1128 consequences. *Mol Genet Genomics*. doi:10.1007/s00438-014-0889-2
- 1129 Goldman JS, Hahn SE, Catania JW, Larusse-Eckert S, Butson MB, Rumbaugh M, Strecker MN, Roberts  
1130 JS, Burke W, Mayeux R, Bird T. 2011. Genetic counseling and testing for Alzheimer disease: Joint  
1131 practice guidelines of the American College of Medical Genetics and the National Society of  
1132 Genetic Counselors. *Genet Med* **13**:597–605. doi:10.1097/GIM.0b013e31821d69b8
- 1133 Guo Y, Livne-Bar I, Zhou L, Boulianne GL. 1999. Drosophila presenilin is required for neuronal  
1134 differentiation and affects notch subcellular localization and signaling. *J Neurosci* **19**:8435–8442.  
1135 doi:10.1523/jneurosci.19-19-08435.1999
- 1136 Hakim-Mishnaevski K, Flint-Brodsky N, Shklyar B, Levy-Adam F, Kurant E. 2019. Glial Phagocytic  
1137 Receptors Promote Neuronal Loss in Adult Drosophila Brain. *Cell Rep* **29**:1438-1448.e3.  
1138 doi:10.1016/j.celrep.2019.09.086
- 1139 Hampel H, Mesulam MM, Cuello AC, Farlow MR, Giacobini E, Grossberg GT, Khachaturian AS,  
1140 Vergallo A, Cavedo E, Snyder PJ, Khachaturian ZS. 2018. The cholinergic system in the  
1141 pathophysiology and treatment of Alzheimer’s disease. *Brain*. doi:10.1093/brain/awy132
- 1142 Haney MS, Bohlen CJ, Morgens DW, Ousey JA, Barkal AA, Tsui CK, Ego BK, Levin R, Kamber RA,  
1143 Collins H, Tucker A, Li A, Vorselen D, Labitigan L, Crane E, Boyle E, Jiang L, Chan J, Rincón E,  
1144 Greenleaf WJ, Li B, Snyder MP, Weissman IL, Theriot JA, Collins SR, Barres BA, Bassik MC.  
1145 2018. Identification of phagocytosis regulators using magnetic genome-wide CRISPR screens. *Nat*



- 1146 *Genet* **50**:1716–1727. doi:10.1038/s41588-018-0254-1
- 1147 Harnish J, Deal SL, Chao HT, Wangler MF, Yamamoto S. 2019. In vivo functional study of disease-  
1148 associated rare human variants using drosophila. *J Vis Exp* **2019**. doi:10.3791/59658
- 1149 Hori K, Sen A, Artavanis-Tsakonas S. 2013. Notch signaling at a glance. *J Cell Sci* **126**:2135–2140.  
1150 doi:10.1242/jcs.127308
- 1151 Housden BE, Millen K, Bray SJ. 2012. Drosophila reporter vectors compatible with  $\phi$ C31 integrase  
1152 transgenesis techniques and their use to generate new notch reporter fly lines. *G3 Genes, Genomes,*  
1153 *Genet* **2**:79–82. doi:10.1534/g3.111.001321
- 1154 Housden BE, Perrimon N. 2016. Design and generation of donor constructs for genome engineering in  
1155 Drosophila. *Cold Spring Harb Protoc* **2016**:789–793. doi:10.1101/pdb.prot090787
- 1156 Huttlin EL, Bruckner RJ, Paulo JA, Cannon JR, Ting L, Baltier K, Colby G, Gebreab F, Gygi MP, Parzen  
1157 H, Szpyt J, Tam S, Zarraga G, Pontano-Vaites L, Swarup S, White AE, Schweppe DK, Rad R,  
1158 Erickson BK, Obar RA, Guruharsha KG, Li K, Artavanis-Tsakonas S, Gygi SP, Wade Harper J.  
1159 2017. Architecture of the human interactome defines protein communities and disease networks.  
1160 *Nature* **545**:505–509. doi:10.1038/nature22366
- 1161 Jakobsdottir J, van der Lee SJ, Bis JC, Chouraki V, Li-Kroeger D, Yamamoto S, Grove ML, Naj A,  
1162 Vronskaya M, Salazar JL, DeStefano AL, Brody JA, Smith A V., Amin N, Sims R, Ibrahim-Verbaas  
1163 CA, Choi S-H, Satizabal CL, Lopez OL, Beiser A, Ikram MA, Garcia ME, Hayward C, Varga T V.,  
1164 Ripatti S, Franks PW, Hallmans G, Rolandsson O, Jansson J-H, Porteous DJ, Salomaa V,  
1165 Eiriksdottir G, Rice KM, Bellen HJ, Levy D, Uitterlinden AG, Emilsson V, Rotter JI, Aspelund T,  
1166 O’Donnell CJ, Fitzpatrick AL, Launer LJ, Hofman A, Wang L-S, Williams J, Schellenberg GD,  
1167 Boerwinkle E, Psaty BM, Seshadri S, Shulman JM, Gudnason V, van Duijn CM, Shulman JM,  
1168 Gudnason V, Duijn CM van. 2016. Rare Functional Variant in TM2D3 is Associated with Late-  
1169 Onset Alzheimer’s Disease. *PLOS Genet* **12**:e1006327. doi:10.1371/journal.pgen.1006327

- 1170 Kajkowski EM, Lo CF, Ning X, Walker S, Sofia HJ, Wang W, Edris W, Chanda P, Wagner E, Vile S,  
1171 Ryan K, McHendry-Rinde B, Smith SC, Wood A, Rhodes KJ, Kennedy JD, Bard J, Jacobsen JS,  
1172 Ozenberger BA. 2001.  $\beta$ -Amyloid Peptide-induced Apoptosis Regulated by a Novel Protein  
1173 Containing a G Protein Activation Module. *J Biol Chem* **276**:18748–18756.  
1174 doi:10.1074/jbc.M011161200
- 1175 Kang J, Shin S, Perrimon N, Shen J. 2017. An evolutionarily conserved role of presenilin in neuronal  
1176 protection in the aging drosophila brain. *Genetics* **206**:1479–1493. doi:10.1534/genetics.116.196881
- 1177 Karran E, Mercken M, Strooper B De. 2011. The amyloid cascade hypothesis for Alzheimer’s disease:  
1178 An appraisal for the development of therapeutics. *Nat Rev Drug Discov.* doi:10.1038/nrd3505
- 1179 Kasahara M. 2007. The 2R hypothesis: an update. *Curr Opin Immunol.* doi:10.1016/j.coi.2007.07.009
- 1180 Kircher M, Witten DM, Jain P, O’roak BJ, Cooper GM, Shendure J. 2014. A general framework for  
1181 estimating the relative pathogenicity of human genetic variants. *Nat Genet* **46**:310–315.  
1182 doi:10.1038/ng.2892
- 1183 Knott GJ, Doudna JA. 2018. CRISPR-Cas guides the future of genetic engineering. *Science (80- )*.  
1184 doi:10.1126/science.aat5011
- 1185 Koenen A, Babendreyer A, Schumacher J, Pasqualon T, Schwarz N, Seifert A, Deupi X, Ludwig A,  
1186 Drey Mueller D. 2017. The DRF motif of CXCR6 as chemokine receptor adaptation to adhesion.  
1187 *PLoS One* **12**. doi:10.1371/journal.pone.0173486
- 1188 Kopan R, Ilagan MXG. 2009. The Canonical Notch Signaling Pathway: Unfolding the Activation  
1189 Mechanism. *Cell* **137**:216–233. doi:https://doi.org/10.1016/j.cell.2009.03.045
- 1190 Kunkle BW, Grenier-Boley B, Sims R, Bis JC, Damotte V, Naj AC, Boland A, Vronskaya M, van der  
1191 Lee SJ, Amlie-Wolf A, Bellenguez C, Frizatti A, Chouraki V, Martin ER, Sleegers K,  
1192 Badarinarayan N, Jakobsdottir J, Hamilton-Nelson KL, Moreno-Grau S, O’Laso R, Raybould R, Chen

1193 Y, Kuzma AB, Hiltunen M, Morgan T, Ahmad S, Vardarajan BN, Epelbaum J, Hoffmann P, Boada  
1194 M, Beecham GW, Garnier JG, Harold D, Fitzpatrick AL, Valladares O, Moutet ML, Gerrish A,  
1195 Smith A V., Qu L, Bacq D, Denning N, Jian X, Zhao Y, Del Zompo M, Fox NC, Choi SH, Mateo I,  
1196 Hughes JT, Adams HH, Malamon J, Sanchez-Garcia F, Patel Y, Brody JA, Dombroski BA, Naranjo  
1197 MCD, Daniilidou M, Eiriksdottir G, Mukherjee S, Wallon D, Uphill J, Aspelund T, Cantwell LB,  
1198 Garzia F, Galimberti D, Hofer E, Butkiewicz M, Fin B, Scarpini E, Sarnowski C, Bush WS,  
1199 Meslage S, Kornhuber J, White CC, Song Y, Barber RC, Engelborghs S, Sordon S, Voijnovic D,  
1200 Adams PM, Vandenberghe R, Mayhaus M, Cupples LA, Albert MS, De Deyn PP, Gu W, Himali JJ,  
1201 Beekly D, Squassina A, Hartmann AM, Orellana A, Blacker D, Rodriguez-Rodriguez E, Lovestone  
1202 S, Garcia ME, Doody RS, Munoz-Fernandez C, Sussams R, Lin H, Fairchild TJ, Benito YA, Holmes  
1203 C, Karamujić-Čomić H, Frosch MP, Thonberg H, Maier W, Roschupkin G, Ghetti B, Giedraitis V,  
1204 Kawalia A, Li S, Huebinger RM, Kilander L, Moebus S, Hernández I, Kamboh MI, Brundin RM,  
1205 Turton J, Yang Q, Katz MJ, Concari L, Lord J, Beiser AS, Keene CD, Helisalmi S, Kloszewska I,  
1206 Kukull WA, Koivisto AM, Lynch A, Tarraga L, Larson EB, Haapasalo A, Lawlor B, Mosley TH,  
1207 Lipton RB, Solfrizzi V, Gill M, Longstreth WT, Montine TJ, Frisardi V, Diez-Fairen M,  
1208 Rivadeneira F, Petersen RC, Deramecourt V, Alvarez I, Salani F, Ciarabella A, Boerwinkle E,  
1209 Reiman EM, Fievet N, Rotter JI, Reisch JS, Hanon O, Cupidi C, Andre Uitterlinden AG, Royall DR,  
1210 Dufouil C, Maletta RG, de Rojas I, Sano M, Brice A, Cecchetti R, George-Hyslop PS, Ritchie K,  
1211 Tsolaki M, Tsuang DW, Dubois B, Craig D, Wu CK, Soininen H, Avramidou D, Albin RL,  
1212 Fratiglioni L, Germanou A, Apostolova LG, Keller L, Koutroumani M, Arnold SE, Panza F,  
1213 Gkatzima O, Asthana S, Hannequin D, Whitehead P, Atwood CS, Caffarra P, Hampel H, Quintela I,  
1214 Carracedo Á, Lannfelt L, Rubinsztein DC, Barnes LL, Pasquier F, Frölich L, Barral S, McGuinness  
1215 B, Beach TG, Johnston JA, Becker JT, Passmore P, Bigio EH, Schott JM, Bird TD, Warren JD,  
1216 Boeve BF, Lupton MK, Bowen JD, Proitsi P, Boxer A, Powell JF, Burke JR, Kauwe JSK, Burns  
1217 JM, Mancuso M, Buxbaum JD, Bonuccelli U, Cairns NJ, McQuillin A, Cao C, Livingston G,  
1218 Carlson CS, Bass NJ, Carlsson CM, Hardy J, Carney RM, Bras J, Carrasquillo MM, Guerreiro R,

1219 Allen M, Chui HC, Fisher E, Masullo C, Crocco EA, DeCarli C, Bisceglgio G, Dick M, Ma L, Duara  
1220 R, Graff-Radford NR, Evans DA, Hodges A, Faber KM, Scherer M, Fallon KB, Riemenschneider  
1221 M, Fardo DW, Heun R, Farlow MR, Kölsch H, Ferris S, Leber M, Foroud TM, Heuser I, Galasko  
1222 DR, Giegling I, Gearing M, Hüll M, Geschwind DH, Gilbert JR, Morris J, Green RC, Mayo K,  
1223 Growdon JH, Feulner T, Hamilton RL, Harrell LE, Drichel D, Honig LS, Cushion TD, Huentelman  
1224 MJ, Hollingworth P, Hulette CM, Hyman BT, Marshall R, Jarvik GP, Meggy A, Abner E, Menzies  
1225 GE, Jin LW, Leonenko G, Real LM, Jun GR, Baldwin CT, Grozeva D, Karydas A, Russo G, Kaye  
1226 JA, Kim R, Jessen F, Kowall NW, Vellas B, Kramer JH, Vardy E, LaFerla FM, Jöckel KH, Lah JJ,  
1227 Dichgans M, Leverenz JB, Mann D, Levey AI, Pickering-Brown S, Lieberman AP, Klopp N,  
1228 Lunetta KL, Wichmann HE, Lyketsos CG, Morgan K, Marson DC, Brown K, Martiniuk F, Medway  
1229 C, Mash DC, Nöthen MM, Masliah E, Hooper NM, McCormick WC, Daniele A, McCurry SM,  
1230 Bayer A, McDavid AN, Gallacher J, McKee AC, van den Bussche H, Mesulam M, Brayne C, Miller  
1231 BL, Riedel-Heller S, Miller CA, Miller JW, Al-Chalabi A, Morris JC, Shaw CE, Myers AJ,  
1232 Wiltfang J, O'Bryant S, Olichney JM, Alvarez V, Parisi JE, Singleton AB, Paulson HL, Collinge J,  
1233 Perry WR, Mead S, Peskind E, Cribbs DH, Rossor M, Pierce A, Ryan NS, Poon WW, Nacmias B,  
1234 Potter H, Sorbi S, Quinn JF, Sacchinelli E, Raj A, Spalletta G, Raskind M, Caltagirone C, Bossù P,  
1235 Orfei MD, Reisberg B, Clarke R, Reitz C, Smith AD, Ringman JM, Warden D, Roberson ED,  
1236 Wilcock G, Rogaeva E, Bruni AC, Rosen HJ, Gallo M, Rosenberg RN, Ben-Shlomo Y, Sager MA,  
1237 Mecocci P, Saykin AJ, Pastor P, Cuccaro ML, Vance JM, Schneider JA, Schneider LS, Slifer S,  
1238 Seeley WW, Smith AG, Sonnen JA, Spina S, Stern RA, Swerdlow RH, Tang M, Tanzi RE,  
1239 Trojanowski JQ, Troncoso JC, Van Deerlin VM, Van Eldik LJ, Vinters H V., Vonsattel JP,  
1240 Weintraub S, Welsh-Bohmer KA, Wilhelmsen KC, Williamson J, Wingo TS, Woltjer RL, Wright  
1241 CB, Yu CE, Yu L, Saba Y, Pilotto A, Bullido MJ, Peters O, Crane PK, Bennett D, Bosco P, Coto E,  
1242 Boccardi V, De Jager PL, Lleo A, Warner N, Lopez OL, Ingelsson M, Deloukas P, Cruchaga C,  
1243 Graff C, Gwilliam R, Fornage M, Goate AM, Sanchez-Juan P, Kehoe PG, Amin N, Ertekin-Taner  
1244 N, Berr C, Debette S, Love S, Launer LJ, Younkin SG, Dartigues JF, Corcoran C, Ikram MA,

- 1245 Dickson DW, Nicolas G, Champion D, Tschanz JA, Schmidt H, Hakonarson H, Clarimon J, Munger  
1246 R, Schmidt R, Farrer LA, Van Broeckhoven C, C. O'Donovan M, DeStefano AL, Jones L, Haines  
1247 JL, Deleuze JF, Owen MJ, Gudnason V, Mayeux R, Escott-Price V, Psaty BM, Ramirez A, Wang  
1248 LS, Ruiz A, van Duijn CM, Holmans PA, Seshadri S, Williams J, Amouyel P, Schellenberg GD,  
1249 Lambert JC, Pericak-Vance MA. 2019. Genetic meta-analysis of diagnosed Alzheimer's disease  
1250 identifies new risk loci and implicates A $\beta$ , tau, immunity and lipid processing. *Nat Genet* **51**:414–  
1251 430. doi:10.1038/s41588-019-0358-2
- 1252 Larkin A, Marygold SJ, Antonazzo G, Attrill H, Dos Santos G, Garapati P V., Goodman JL, Gramates  
1253 LS, Millburn G, Strelets VB, Tabone CJ, Thurmond J. 2021. FlyBase: updates to the *Drosophila*  
1254 *melanogaster* knowledge base. *Nucleic Acids Res* **49**:D899–D907. doi:10.1093/nar/gkaa1026
- 1255 Lee T, Luo L. 1999. Mosaic analysis with a repressible neurotechnique cell marker for studies of gene  
1256 function in neuronal morphogenesis. *Neuron* **22**:451–461. doi:10.1016/S0896-6273(00)80701-1
- 1257 Lee Y, Chang DJ, Lee YS, Chang KA, Kim H, Yoon JS, Lee S, Suh YH, Kaang BK. 2003.  $\beta$ -amyloid  
1258 peptide binding protein does not couple to G protein in a heterologous *Xenopus* expression system.  
1259 *J Neurosci Res* **73**:255–259. doi:10.1002/jnr.10652
- 1260 Lehmann R, Dietrich U, Jiménez F, Campos-Ortega JA. 1981. Mutations of early neurogenesis in  
1261 *Drosophila*. *Wilhelm Roux's Arch Dev Biol* **190**:226–229. doi:10.1007/BF00848307
- 1262 Lehmann R, Jiménez F, Dietrich U, Campos-Ortega JA. 1983. On the phenotype and development of  
1263 mutants of early neurogenesis in *Drosophila melanogaster*. *Wilhelm Roux's Arch Dev Biol* **192**:62–  
1264 74. doi:10.1007/BF00848482
- 1265 Lewis J. 1996. Neurogenic genes and vertebrate neurogenesis. *Curr Opin Neurobiol* **6**:3–10.  
1266 doi:10.1016/S0959-4388(96)80002-X
- 1267 Li-Kroeger D, Kanca O, Lee PT, Cowan S, Lee MT, Jaiswal M, Salazar JL, He Y, Zuo Z, Bellen HJ.

- 1268 2018. An expanded toolkit for gene tagging based on MiMIC and scarless CRISPR tagging in  
1269 *Drosophila*. *Elife* **7**. doi:10.7554/eLife.38709
- 1270 Li J, Housden BE, Bray SJ. 2014. Notch signaling assays in *Drosophila* cultured cell lines. *Methods Mol*  
1271 *Biol* **1187**:131–141. doi:10.1007/978-1-4939-1139-4\_10
- 1272 Lieber T, Kidd S, Young MW. 2002. Kuzbanian-mediated cleavage of *Drosophila* Notch. *Genes Dev*  
1273 **16**:209–221. doi:10.1101/gad.942302
- 1274 Linford NJ, Bilgir C, Ro J, Pletcher SD. 2013. Measurement of lifespan in *Drosophila melanogaster*. *J Vis*  
1275 *Exp*. doi:10.3791/50068
- 1276 Long JM, Holtzman DM. 2019. Alzheimer Disease: An Update on Pathobiology and Treatment  
1277 Strategies. *Cell*. doi:10.1016/j.cell.2019.09.001
- 1278 Lott IT, Head E. 2019. Dementia in Down syndrome: unique insights for Alzheimer disease research. *Nat*  
1279 *Rev Neurol*. doi:10.1038/s41582-018-0132-6
- 1280 Luan Z, Reddig K, Li HS. 2014. Loss of Na<sup>+</sup>/K<sup>+</sup>-ATPase in *Drosophila* photoreceptors leads to blindness  
1281 and age-dependent neurodegeneration. *Exp Neurol* **261**:791–801.  
1282 doi:10.1016/j.expneurol.2014.08.025
- 1283 Marcogliese PC, Shashi V, Spillmann RC, Stong N, Rosenfeld JA, Koenig MK, Martínez-Agosto Julián  
1284 A., Herzog M, Chen AH, Dickson PI, Lin HJ, Vera MU, Salamon N, Graham JM, Ortiz D, Infante  
1285 E, Steyaert W, Dermaut B, Poppe B, Chung HL, Zuo Z, Lee PT, Kanca O, Xia F, Yang Y, Smith  
1286 EC, Jasien J, Kansagra S, Spiridigliozzi G, El-Dairi M, Lark R, Riley K, Koeberl DD, Golden-Grant  
1287 K, Callens S, Coucke P, Dermaut B, Hemelsoet D, Poppe B, Steyaert W, Terry W, Van Coster R,  
1288 Adams DR, Alejandro ME, Allard P, Azamian MS, Bacino CA, Balasubramanyam A, Barseghyan  
1289 H, Batzli GF, Beggs AH, Behnam B, Bican A, Bick DP, Birch CL, Bonner D, Boone BE, Bostwick  
1290 BL, Briere LC, Brown DM, Brush M, Burke EA, Burrage LC, Chen S, Clark GD, Coakley TR,

- 1291 Cogan JD, Cooper CM, Cope H, Craigen WJ, D’Souza P, Davids M, Dayal JG, Dell’Angelica EC,  
1292 Dhar SU, Dillon A, Dipple KM, Donnell-Fink LA, Dorrani N, Dorset DC, Douine ED, Draper DD,  
1293 Eckstein DJ, Emrick LT, Eng CM, Eskin A, Esteves C, Estwick T, Ferreira C, Fogel BL, Friedman  
1294 ND, Gahl WA, Glanton E, Godfrey RA, Goldstein DB, Gould SE, Gourdine JPF, Groden CA,  
1295 Gropman AL, Haendel M, Hamid R, Hanchard NA, Handley LH, Herzog MR, Holm IA, Hom J,  
1296 Howerton EM, Huang Y, Jacob HJ, Jain M, Jiang Y hui, Johnston JM, Jones AL, Kohane IS,  
1297 Krasnewich DM, Krieg EL, Krier JB, Lalani SR, Lau CC, Lazar J, Lee BH, Lee H, Levy SE, Lewis  
1298 RA, Lincoln SA, Lipson A, Loo SK, Loscalzo J, Maas RL, Macnamara EF, MacRae CA, Maduro V  
1299 V., Majcherska MM, Malicdan MC V., Mamounas LA, Manolio TA, Markello TC, Marom R,  
1300 Martínez-Agosto Julian A., Marwaha S, May T, McConkie-Rosell A, McCormack CE, McCray AT,  
1301 Might M, Moretti PM, Morimoto M, Mulvihill JJ, Murphy JL, Muzny DM, Nehrebecky ME, Nelson  
1302 Stan F., Newberry JS, Newman JH, Nicholas SK, Novacic D, Orange JS, Pallais JC, Palmer CGS,  
1303 Papp JC, Parker NH, Pena LDM, Phillips JA, Posey JE, Postlethwait JH, Potocki L, Pusey BN,  
1304 Reuter CM, Robertson AK, Rodan LH, Rosenfeld JA, Sampson JB, Samson SL, Schoch K,  
1305 Schroeder MC, Scott DA, Sharma P, Shashi V, Signer R, Silverman EK, Sinsheimer JS, Smith KS,  
1306 Spillmann RC, Splinter K, Stoler JM, Stong N, Sullivan JA, Sweetser DA, Tiftt CJ, Toro C, Tran  
1307 AA, Urv TK, Valivullah ZM, Vilain E, Vogel TP, Wahl CE, Walley NM, Walsh CA, Ward PA,  
1308 Waters KM, Westerfield M, Wise AL, Wolfe LA, Worthey EA, Yamamoto S, Yang Y, Yu G,  
1309 Zastrow DB, Zheng A, Yamamoto S, Wangler MF, Mirzaa G, Hemelsoet D, Lee B, Nelson Stanley  
1310 F., Goldstein DB, Bellen HJ, Pena LDM. 2018. IRF2BPL Is Associated with Neurological  
1311 Phenotypes. *Am J Hum Genet* **103**:245–260. doi:10.1016/j.ajhg.2018.07.006
- 1312 Martínez VG, Javadi CS, Ngo E, Ngo L, Lagow RD, Zhang B. 2007. Age-related changes in climbing  
1313 behavior and neural circuit physiology in *Drosophila*. *Dev Neurobiol* **67**:778–791.  
1314 doi:10.1002/dneu.20388
- 1315 Melcarne C, Lemaitre B, Kurant E. 2019. Phagocytosis in *Drosophila*: From molecules and cellular



- 1316 machinery to physiology. *Insect Biochem Mol Biol* **109**:1–12. doi:10.1016/j.ibmb.2019.04.002
- 1317 Micchelli CA, Rulifson EJ, Blair SS. 1997. The function and regulation of cut expression on the wing  
1318 margin of *Drosophila*: Notch, Wingless and a dominant negative role for Delta and Serrate.  
1319 *Development* **124**:1485–1495.
- 1320 Michellod M-A, Forquignon F, Santamaria P, Randsholt NB. 2003. Differential requirements for the  
1321 neurogenic gene *almondex* during *Drosophila melanogaster* development. *genesis* **37**:113–122.  
1322 doi:10.1002/gene.10233
- 1323 Michellod MA, Randsholt NB. 2008. Implication of the *Drosophila* beta-amyloid peptide binding-like  
1324 protein AMX in Notch signaling during early neurogenesis. *Brain Res Bull* **75**:305–309.  
1325 doi:10.1016/j.brainresbull.2007.10.060
- 1326 Mumm JS, Schroeter EH, Saxena MT, Griesemer A, Tian X, Pan DJ, Ray WJ, Kopan R. 2000. A ligand-  
1327 induced extracellular cleavage regulates  $\gamma$ -secretase-like proteolytic activation of Notch1. *Mol Cell*  
1328 **5**:197–206. doi:10.1016/S1097-2765(00)80416-5
- 1329 O’Neill EM, Rebay I, Tjian R, Rubin GM. 1994. The activities of two Ets-related transcription factors  
1330 required for *drosophila* eye development are modulated by the Ras/MAPK pathway. *Cell* **78**:137–  
1331 147. doi:10.1016/0092-8674(94)90580-0
- 1332 Oughtred R, Rust J, Chang C, Breitkreutz BJ, Stark C, Willems A, Boucher L, Leung G, Kolas N, Zhang  
1333 F, Dolma S, Coulombe-Huntington J, Chatr-aryamontri A, Dolinski K, Tyers M. 2021. The  
1334 BioGRID database: A comprehensive biomedical resource of curated protein, genetic, and chemical  
1335 interactions. *Protein Sci* **30**:187–200. doi:10.1002/pro.3978
- 1336 Oyston LJ, Lin YQ, Khuong TM, Wang Q-P, Lau MT, Clark T, Neely GG. 2018. Neuronal Lamin  
1337 regulates motor circuit integrity and controls motor function and lifespan. *Cell Stress* **2**:225–232.  
1338 doi:10.15698/cst2018.09.152

- 1339 Port F, Chen HM, Lee T, Bullock SL. 2014. Optimized CRISPR/Cas tools for efficient germline and  
1340 somatic genome engineering in *Drosophila*. *Proc Natl Acad Sci U S A* **111**:E2967–E2976.  
1341 doi:10.1073/pnas.1405500111
- 1342 Rooke J, Pan D, Xu T, Rubin GM. 1996. KUZ, a conserved metalloprotease-disintegrin protein with two  
1343 roles in *Drosophila* neurogenesis. *Science (80- )* **273**:1227–1231.  
1344 doi:10.1126/science.273.5279.1227
- 1345 Sala Frigerio C, De Strooper B. 2016. Alzheimer’s Disease Mechanisms and Emerging Roads to Novel  
1346 Therapeutics. *Annu Rev Neurosci* **39**:57–79. doi:10.1146/annurev-neuro-070815-014015
- 1347 Salazar JL, Yamamoto S. 2018. Integration of *Drosophila* and human genetics to understand notch  
1348 signaling related diseases *Advances in Experimental Medicine and Biology*. Springer New York  
1349 LLC. pp. 141–185. doi:10.1007/978-3-319-89512-3\_8
- 1350 Salazar JL, Yang S-A, Yamamoto S. 2020. Post-developmental roles of notch signaling in the nervous  
1351 system. *Biomolecules* **10**. doi:10.3390/biom10070985
- 1352 Sarov M, Barz C, Jambor H, Hein MY, Schmied C, Suchold D, Stender B, Janosch S, Vinay Vikas KJ,  
1353 Krishnan RT, Krishnamoorthy A, Ferreira IRS, Ejsmont RK, Finkl K, Hasse S, Kämpfer P, Plewka  
1354 N, Vinis E, Schloissnig S, Knust E, Hartenstein V, Mann M, Ramaswami M, VijayRaghavan K,  
1355 Tomancak P, Schnorrer F. 2016. A genome-wide resource for the analysis of protein localisation in  
1356 *Drosophila*. *Elife* **5**. doi:10.7554/eLife.12068
- 1357 Saura CA, Choi SY, Beglopoulos V, Malkani S, Zhang D, Rao BSS, Chattarji S, Kelleher RJ, Kandel ER,  
1358 Duff K, Kirkwood A, Shen J. 2004. Loss of presenilin function causes impairments of memory and  
1359 synaptic plasticity followed by age-dependent neurodegeneration. *Neuron* **42**:23–36.  
1360 doi:10.1016/S0896-6273(04)00182-5
- 1361 Schnute B, Troost T, Klein T. 2018. Endocytic trafficking of the notch receptor *Advances in Experimental*

- 1362 Medicine and Biology. Springer New York LLC. pp. 99–122. doi:10.1007/978-3-319-89512-3\_6
- 1363 Schweisguth F. 2015. Asymmetric cell division in the *Drosophila* bristle lineage: From the polarization of  
1364 sensory organ precursor cells to Notch-mediated binary fate decision. *Wiley Interdiscip Rev Dev*  
1365 *Biol* **4**:299–309. doi:10.1002/wdev.175
- 1366 Serrano-Pozo A, Das S, Hyman BT. 2021. APOE and Alzheimer’s disease: advances in genetics,  
1367 pathophysiology, and therapeutic approaches. *Lancet Neurol*. doi:10.1016/S1474-4422(20)30412-9
- 1368 Shannon MP. 1973. The development of eggs produced by the female-sterile mutant almondex of  
1369 *Drosophila melanogaster*. *J Exp Zool* **183**:383–400. doi:10.1002/jez.1401830312
- 1370 Shannon MP. 1972. Characterization of the female-sterile mutant Almondex of *Drosophila melanogaster*.  
1371 *Genetica* **43**:244–256. doi:10.1007/BF00123632
- 1372 Sim NL, Kumar P, Hu J, Henikoff S, Schneider G, Ng PC. 2012. SIFT web server: Predicting effects of  
1373 amino acid substitutions on proteins. *Nucleic Acids Res* **40**:W452–W457. doi:10.1093/nar/gks539
- 1374 Sperling RA, Aisen PS, Beckett LA, Bennett DA, Craft S, Fagan AM, Iwatsubo T, Jack CR, Kaye J,  
1375 Montine TJ, Park DC, Reiman EM, Rowe CC, Siemers E, Stern Y, Yaffe K, Carrillo MC, Thies B,  
1376 Morrison-Bogorad M, Wagster M V., Phelps CH. 2011. Toward defining the preclinical stages of  
1377 Alzheimer’s disease: Recommendations from the National Institute on Aging-Alzheimer’s  
1378 Association workgroups on diagnostic guidelines for Alzheimer’s disease. *Alzheimer’s Dement*  
1379 **7**:280–292. doi:10.1016/j.jalz.2011.03.003
- 1380 Strittmatter WJ, Saunders AM, Schmechel D, Pericak-Vance M, Enghild J, Salvesen GS, Roses AD.  
1381 1993. Apolipoprotein E: High-avidity binding to  $\beta$ -amyloid and increased frequency of type 4 allele  
1382 in late-onset familial Alzheimer disease. *Proc Natl Acad Sci U S A* **90**:1977–1981.  
1383 doi:10.1073/pnas.90.5.1977
- 1384 Tabuchi K, Chen G, Südhof TC, Shen J. 2009. Conditional forebrain inactivation of nicastrin causes

- 1385 progressive memory impairment and age-related neurodegeneration. *J Neurosci* **29**:7290–301.  
1386 doi:10.1523/JNEUROSCI.1320-09.2009
- 1387 Tanouye MA, Wyman RJ. 1980. Motor outputs of giant nerve fiber in *Drosophila*. *J Neurophysiol*  
1388 **44**:405–421. doi:10.1152/jn.1980.44.2.405
- 1389 Tito AJ, Cheema S, Jiang M, Zhang S. 2016. A simple one-step dissection protocol for whole-mount  
1390 preparation of adult drosophila brains. *J Vis Exp* **2016**:55128. doi:10.3791/55128
- 1391 Venken KJT, He Y, Hoskins RA, Bellen HJ. 2006. P[acman]: A BAC transgenic platform for targeted  
1392 insertion of large DNA fragments in *D. melanogaster*. *Science (80- )* **314**:1747–1751.  
1393 doi:10.1126/science.1134426
- 1394 Watanabe H, Iqbal M, Zheng J, Wines-Samuelson M, Shen J. 2014. Partial loss of presenilin impairs age-  
1395 dependent neuronal survival in the cerebral cortex. *J Neurosci* **34**:15912–15922.  
1396 doi:10.1523/JNEUROSCI.3261-14.2014
- 1397 Watson MR, Lagow RD, Xu K, Zhang B, Bonini NM. 2008. A *Drosophila* model for amyotrophic lateral  
1398 sclerosis reveals motor neuron damage by human SOD1. *J Biol Chem* **283**:24972–24981.  
1399 doi:10.1074/jbc.M804817200
- 1400 Wharton KA, Johansen KM, Xu T, Artavanis-Tsakonas S. 1985. Nucleotide sequence from the  
1401 neurogenic locus Notch implies a gene product that shares homology with proteins containing EGF-  
1402 like repeats. *Cell* **43**:567–581. doi:10.1016/0092-8674(85)90229-6
- 1403 Wines-Samuelson M, Schulte EC, Smith MJ, Aoki C, Liu X, Kelleher RJ, Shen J. 2010. Characterization  
1404 of age-dependent and progressive cortical neuronal degeneration in Presenilin conditional mutant  
1405 mice. *PLoS One* **5**:10195. doi:10.1371/journal.pone.0010195
- 1406 Wu B, Yamaguchi H, Lai FA, Shen J. 2013. Presenilins regulate calcium homeostasis and presynaptic  
1407 function via ryanodine receptors in hippocampal neurons. *Proc Natl Acad Sci U S A* **110**:15091–

- 1408 15096. doi:10.1073/pnas.1304171110
- 1409 Yamamoto S, Charng WL, Bellen HJ. 2010. Endocytosis and intracellular trafficking of notch and its  
1410 ligands, *Current Topics in Developmental Biology*. *Curr Top Dev Biol*. doi:10.1016/S0070-  
1411 2153(10)92005-X
- 1412 Yamamoto S, Charng WL, Rana NA, Kakuda S, Jaiswal M, Bayat V, Xiong B, Zhang K, Sandoval H,  
1413 David G, Wang H, Haltiwanger RS, Bellen HJ. 2012. A mutation in EGF repeat-8 of notch  
1414 discriminates between serrate/jagged and delta family ligands. *Science (80- )* **338**:1229–1232.  
1415 doi:10.1126/science.1228745
- 1416 Yamamoto S, Schulze KL, Bellen HJ. 2014. Introduction to notch signaling. *Methods Mol Biol*.  
1417 doi:10.1007/978-1-4939-1139-4\_1
- 1418 Yang SA, Deng WM. 2018. Serrate/notch signaling regulates the size of the progenitor cell pool in  
1419 *Drosophila* imaginal rings. *Genetics* **209**:829–843. doi:10.1534/genetics.118.300963
- 1420 Zhang C, Wu B, Beglopoulos V, Wines-Samuelson M, Zhang D, Dragatsis I, Südhof TC, Shen J. 2009.  
1421 Presenilins are essential for regulating neurotransmitter release. *Nature* **460**:632–636.  
1422 doi:10.1038/nature08177
- 1423 Zhang S, Zhang M, Cai F, Song W. 2013. Biological function of Presenilin and its role in AD  
1424 pathogenesis. *Transl Neurodegener*. doi:10.1186/2047-9158-2-15
- 1425 Zhang Y, Chen K, Sloan SA, Bennett ML, Scholze AR, O’Keefe S, Phatnani HP, Guarnieri P, Caneda C,  
1426 Ruderisch N, Deng S, Liddelow SA, Zhang C, Daneman R, Maniatis T, Barres BA, Wu JQ. 2014.  
1427 An RNA-sequencing transcriptome and splicing database of glia, neurons, and vascular cells of the  
1428 cerebral cortex. *J Neurosci* **34**:11929–11947. doi:10.1523/JNEUROSCI.1860-14.2014
- 1429 Zhao XL, Wang WA, Tan JX, Huang JK, Zhang X, Zhang BZ, Wang YH, YangCheng HY, Zhu HL, Sun  
1430 XJ, Huang F De. 2010. Expression of  $\beta$ -amyloid induced age-dependent presynaptic and axonal

1431 changes in *Drosophila*. *J Neurosci* **30**:1512–1522. doi:10.1523/JNEUROSCI.3699-09.2010

1432
